# Supplementary material for: A copper-catalyzed four-component reaction of arylcyclopropanes, nitriles, carboxylic acids and N-fluorobenzenesulfonimide: facile synthesis of imide derivatives
Source: Royal Society of Chemistry journal article supplement (doi:10.1039/d2sc04913a), 2022-01-01

## *Supporting Information*

# **Copper-catalyzed four-component reaction of arylcyclopropanes, nitriles, carboxylic acids and *N*-fluorobenzenesulfonimide: facile synthesis of imide derivatives**

Shengbiao Yang,<sup>‡ab</sup> Chunyang Liu,<sup>‡a</sup> Xiaoyan Shangguan,<sup>a</sup> Yan Li,<sup>a\*</sup> and Qian Zhang<sup>ac</sup>

<sup>a</sup> Key Laboratory of Functional Organic Molecule Design & Synthesis of Jilin Province, Department of Chemistry, Northeast Normal University, Changchun, Jilin 130024, China.  
E-mail: liy078@nenu.edu.cn

<sup>b</sup> Heze Branch, Qilu University of Technology (Shandong Academy of Sciences), Biological Engineering Technology Innovation Center of Shandong Province, 274000, China.

<sup>c</sup> State Key Laboratory of Organometallic Chemistry, Shanghai Institute of Organic Chemistry, Chinese Academy of Sciences, Shanghai 200032, China.

<sup>‡</sup> These authors contributed equally.

## **Table of Contents**

|                                                                                |            |
|--------------------------------------------------------------------------------|------------|
| <b>I. General considerations.....</b>                                          | <b>S2</b>  |
| <b>II. Details for condition optimization.....</b>                             | <b>S2</b>  |
| <b>III. Experimental procedures.....</b>                                       | <b>S4</b>  |
| <b>IV. Preliminary mechanistic study.....</b>                                  | <b>S5</b>  |
| <b>V. Analytical data of new compounds.....</b>                                | <b>S7</b>  |
| <b>VI. References.....</b>                                                     | <b>S22</b> |
| <b>VII. <sup>1</sup>H and <sup>13</sup>C NMR Spectra of new compounds.....</b> | <b>S23</b> |

## I. General considerations

**General.** All reactions were performed under nitrogen atmosphere in flame dried flasks. All reactions were monitored by thin layer chromatography (TLC) using Macherey-Nagel 0.20 mm silica gel 60 plates. Flash column chromatography was performed on silica gel 60 (particle size 300-400 mesh ASTM, purchased from Taizhou, China).  $^1\text{H}$  and  $^{13}\text{C}$  nuclear magnetic resonance (NMR) spectra were recorded on Bruker AV- 600 NMR spectrometers or Bruker AV- 500 NMR spectrometers.  $^1\text{H}$  and  $^{13}\text{C}$  NMR spectra are reported in parts per million (ppm) downfield from an internal standard, tetramethylsilane (0 ppm for  $^1\text{H}$ ) and  $\text{CHCl}_3$  (77.0 ppm for  $^{13}\text{C}$ ), respectively. The chemical shifts are expressed in ppm and coupling constants are given in Hz. Data for  $^1\text{H}$  NMR are recorded as follows: chemical shift (ppm), multiplicity (s, singlet; d, doublet; t, triplet; q, quarter; m, multiplet; br, broad), coupling constant (Hz), integration. Data for  $^{13}\text{C}$  NMR are reported in terms of chemical shift ( $\delta$ , ppm). High-resolution mass spectra (HRMS) were recorded on Bruker microtof.

**Materials.** All commercially available compounds were purchased from Aldrich, Alfa Aesar or Adamas. Cyclopropane substrates were synthesized according to procedures described in the literature.<sup>1,2</sup> Reaction solvents  $\text{CH}_3\text{CN}$ , DCM (dichloromethane) and DCE (1,2-dichloroethane) were distilled over  $\text{CaH}_2$  and stored under nitrogen atmosphere. While MTBE (methyl *t*-butyl ether) was distilled over sodium and stored under nitrogen atmosphere.

## II. Details for condition optimization

**Table S1. Variation of reaction parameters <sup>a</sup>**

|       |                                        |    |                        |
|-------|----------------------------------------|----|------------------------|
|       |                                        |    |                        |
| 1a    | 2                                      | 3a | 4a                     |
|       |                                        |    |                        |
| Entry | Variation from the standard conditions |    | Yield (%) <sup>b</sup> |
| 1     | none                                   |    | 99                     |
| 2     | without ligand                         |    | trace                  |
| 3     | without LiO'Bu                         |    | 75                     |
| 4     | LiOMe instead of LiO'Bu                |    | 88                     |
| 5     | LiOH instead of LiO'Bu                 |    | 76                     |
| 6     | NaO'Bu instead of LiO'Bu               |    | 55                     |

|    |                                                                                     |       |
|----|-------------------------------------------------------------------------------------|-------|
| 7  | KO <sup>t</sup> Bu instead of LiO <sup>t</sup> Bu                                   | n. r. |
| 8  | CuBr instead of Cu(CH <sub>3</sub> CN) <sub>4</sub> PF <sub>6</sub>                 | 72    |
| 9  | CuOAc instead of Cu(CH <sub>3</sub> CN) <sub>4</sub> PF <sub>6</sub>                | 45    |
| 10 | CuBr instead of Cu(CH <sub>3</sub> CN) <sub>4</sub> PF <sub>6</sub>                 | 85    |
| 11 | Cu(OTf) <sub>2</sub> instead of Cu(CH <sub>3</sub> CN) <sub>4</sub> PF <sub>6</sub> | 91    |
| 12 | FeCl <sub>3</sub> instead of Cu(CH <sub>3</sub> CN) <sub>4</sub> PF <sub>6</sub>    | n. r. |
| 13 | air instead of N <sub>2</sub>                                                       | 20    |
| 14 | commercial CH <sub>3</sub> CN instead of anhydrous CH <sub>3</sub> CN               | 73    |
| 15 | 25 °C instead of 40 °C                                                              | 96    |
| 16 | 60 °C instead of 40 °C                                                              | 40    |
| 17 | <b>L2</b> instead of <b>L1</b>                                                      | n. r. |
| 18 | <b>L3</b> instead of <b>L1</b>                                                      | n. r. |
| 19 | <b>L4</b> instead of <b>L1</b>                                                      | 73    |

<sup>a</sup> Reaction was performed with **1a** (0.4 mmol, 2 equiv), NFSI (**2**, 0.5 mmol, 2.5 equiv), **3a** (0.2 mmol), Cu(CH<sub>3</sub>CN)<sub>4</sub>PF<sub>6</sub> (0.02 mmol, 10 mol%), ligand (0.024 mmol, 12 mol%) and LiO<sup>t</sup>Bu (0.2 mmol, 1 equiv) in CH<sub>3</sub>CN (2 mL) under N<sub>2</sub> atmosphere. <sup>b</sup> Yield was determined by <sup>1</sup>H NMR with α-methylstyrene as an internal standard. n. r. = not reaction.

**Table S2. Screening of the amount of CH<sub>3</sub>CN<sup>a</sup>**

| 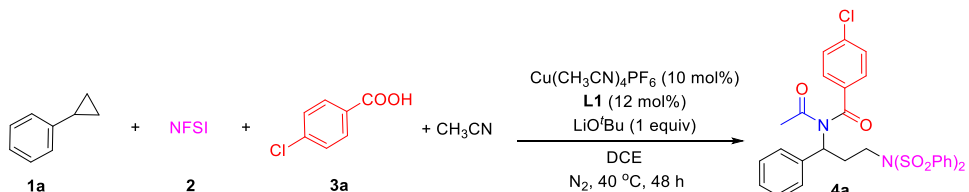 |                              |                        |
|-------------------------------------------------------------------------------------|------------------------------|------------------------|
| Entry                                                                               | CH <sub>3</sub> CN (x equiv) | Yield (%) <sup>b</sup> |
| 1                                                                                   | 3                            | 72                     |
| 2                                                                                   | 5                            | 82                     |
| 3                                                                                   | 10                           | 86                     |
| 4                                                                                   | 15                           | 91                     |

<sup>a</sup> Reaction was performed with **1a** (0.4 mmol, 2 equiv), NFSI (**2**, 0.5 mmol, 2.5 equiv), **3a** (0.2 mmol), Cu(CH<sub>3</sub>CN)<sub>4</sub>PF<sub>6</sub> (0.02 mmol, 10 mol%), ligand (0.024 mmol, 12 mol%) and LiO<sup>t</sup>Bu (0.2 mmol, 1 equiv) in DCE (2 mL) and CH<sub>3</sub>CN (x equiv) under N<sub>2</sub> atmosphere. <sup>b</sup> Yield was determined by <sup>1</sup>H NMR with α-methylstyrene as an internal standard. DCE = ethylenedichloride.

**Table S3. Screening of the solvents<sup>a</sup>**

| 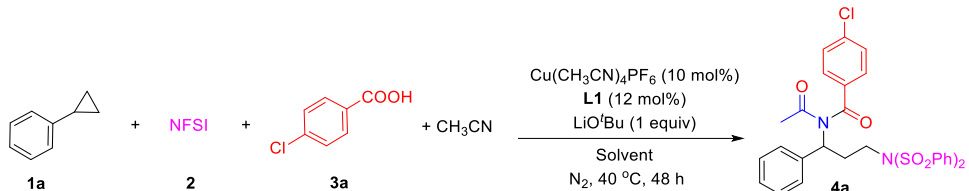 |                   |                        |
|--------------------------------------------------------------------------------------|-------------------|------------------------|
| Entry                                                                                | Solvent           | Yield (%) <sup>b</sup> |
| 1                                                                                    | MTBE              | trace                  |
| 2                                                                                    | PhCF <sub>3</sub> | 63                     |
| 3                                                                                    | DCM               | 99                     |
| 4                                                                                    | CCl <sub>4</sub>  | 69                     |
| 5                                                                                    | DCE               | 91                     |

<sup>a</sup> Reaction was performed with **1a** (0.4 mmol, 2 equiv), NFSI (**2**, 0.5 mmol, 2.5 equiv), **3a** (0.2 mmol), Cu(CH<sub>3</sub>CN)<sub>4</sub>PF<sub>6</sub> (0.02 mmol, 10 mol%), ligand (0.024 mmol, 12 mol%) and LiO<sup>t</sup>Bu (0.2 mmol, 1 equiv) in the solvent (2 mL) and CH<sub>3</sub>CN (15 equiv) under N<sub>2</sub> atmosphere. <sup>b</sup> Yield was determined by <sup>1</sup>H NMR with α-methylstyrene as an internal standard. MTBE = methyl tert-butyl ether. DCM = dichloromethane.

### III. Experimental procedures

#### (1) General procedure for copper-catalyzed four-component reaction of arylcyclopropanes

##### 1) The method A: Take 4a as an example

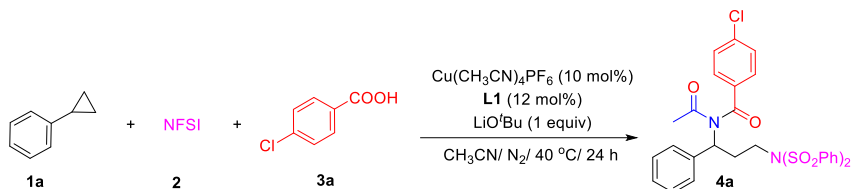

In a nitrogen-filled glove box, a flame-dried screw-cap reaction tube equipped with a Teflon-coated magnetic stir bar was charged with  $\text{Cu}(\text{CH}_3\text{CN})_4\text{PF}_6$  (10 mol%), **L1** (12 mol%). Anhydrous acetonitrile (2 mL) was added and the reaction mixture was stirred for 10 min, then cyclopropane **1a** (0.4 mmol, 50  $\mu\text{L}$ , 2 equiv), **3a** (0.2 mmol) and  $\text{LiO}^t\text{Bu}$  (1 equiv) were added at room temperature. After stirring for 10 min, NFSI (0.5 mmol, 2.5 equiv) was added. The tube was sealed with a Thermo Scientific PTFE screw cap equipped with a septum, and removed from the glove box. Then, the sealed tube was then stirred at 40  $^\circ\text{C}$ . Upon completion (monitored by TLC). The reaction was quenched with water, extracted with DCM (3 $\times$ 10 mL), and the combined organic layers were concentrated in vacuo. The resulting crude product was purified by flash column chromatography on silica gel (ethyl acetate/petroleum ether, 1:4) to obtain product **4a**.

##### 2) The method B: Take 7a as an example

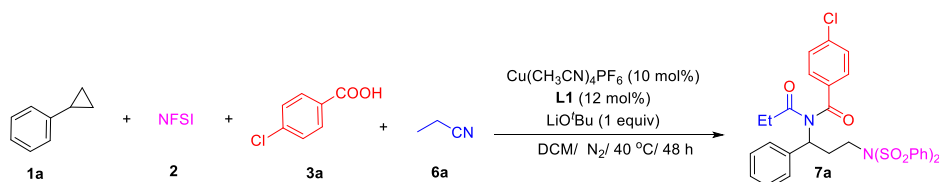

In a nitrogen-filled glove box, a flame-dried screw-cap reaction tube equipped with a Teflon-coated magnetic stir bar was charged with  $\text{Cu}(\text{CH}_3\text{CN})_4\text{PF}_6$  (10 mol%), **L1** (12 mol%). Anhydrous DCM (2 mL) and **6a** (15 equiv) were added, the reaction mixture was stirred for 10 min, then cyclopropane **1a** (0.4 mmol, 50  $\mu\text{L}$ , 2 equiv), **3a** (0.2 mmol) and  $\text{LiO}^t\text{Bu}$  (1 equiv) were added at room temperature. After stirring for 10 min, NFSI (0.5 mmol, 2.5 equiv) was added. The tube was sealed with a Thermo Scientific PTFE screw cap equipped with a septum, and removed from the glove box. Then, the sealed tube was then stirred at 40  $^\circ\text{C}$ . Upon completion (monitored by TLC). The reaction was quenched with water, extracted with DCM (3 $\times$ 10 mL), and the combined organic layers were concentrated

in vacuo. The resulting crude product was purified by flash column chromatography on silica gel (ethyl acetate/petroleum ether, 1:4) to obtain product **7a**.

## (2) The procedure for gram-scale synthesis of **4a**

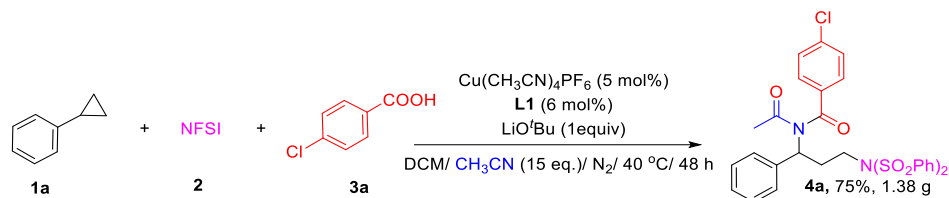

In a nitrogen-filled glove box, a flame-dried screw-cap reaction tube equipped with a Teflon-coated magnetic stir bar was charged with  $\text{Cu}(\text{CH}_3\text{CN})_4\text{PF}_6$  (5 mol%), **L1** (6 mol%). Anhydrous DCM (8 mL) and  $\text{CH}_3\text{CN}$  (15 equiv) were added, the reaction mixture was stirred for 10 min, then cyclopropane **1a** (6 mmol, 750  $\mu\text{L}$ , 2 equiv), **3a** (3 mmol) and  $\text{LiO}^t\text{Bu}$  (1 equiv) were added at room temperature. After stirring for 10 min, NFSI (7.5 mmol, 2.5 equiv) was added. The tube was sealed with a Thermo Scientific PTFE screw cap equipped with a septum, and removed from the glove box. Then, the sealed tube was then stirred at 40 °C. Upon completion (monitored by TLC). The reaction was quenched with water, extracted with DCM (3×50 mL), and the combined organic layers were concentrated in vacuo. The resulting crude product was purified by flash column chromatography on silica gel (ethyl acetate/petroleum ether, 1:4) to obtain product **4a** (75%, 1.38 g).

## IV. Preliminary mechanistic study

### (1) TEMPO or BHT was added at the standard conditions

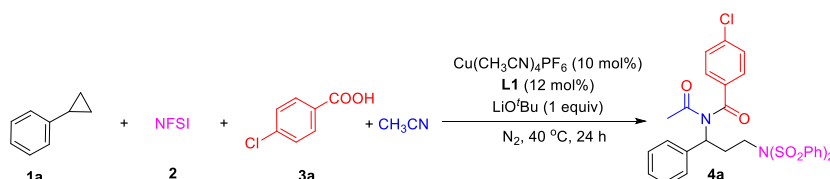

| Radical inhibitor (2 equiv) | Yield (%) of <b>4a</b> |
|-----------------------------|------------------------|
| TEMPO                       | 10                     |
| BHT                         | trace                  |

In a nitrogen-filled glove box, a flame-dried screw-cap reaction tube equipped with a Teflon-coated magnetic stir bar was charged with  $\text{Cu}(\text{CH}_3\text{CN})_4\text{PF}_6$  (10 mol%), **L1** (12 mol%). Anhydrous acetonitrile (2 mL) was added and the reaction mixture was stirred for 10 min, then cyclopropane **1a** (0.4 mmol, 50  $\mu\text{L}$ , 2 equiv), **3a** (0.2 mmol) and  $\text{LiO}^t\text{Bu}$  (1

equiv) were added at room temperature. After stirring for 10 min, NFSI (0.5 mmol, 2.5 equiv) was added. Then BHT (0.4 mmol, 2 equiv) or TEMPO (0.4 mmol, 2 equiv) was added. The tube was sealed with a Thermo Scientific PTFE screw cap equipped with a septum, and removed from the glove box. Then, the sealed tube was then stirred at 40 °C. Upon completion (monitored by TLC). The reaction was quenched with water, extracted with DCM (3×10 mL), and the combined organic layers were concentrated in vacuo. The resulting crude product was purified by flash column chromatography on silica gel (ethyl acetate/petroleum ether, 1:4) to obtain product **4a**.

### (2) With compound **8** as the substrate

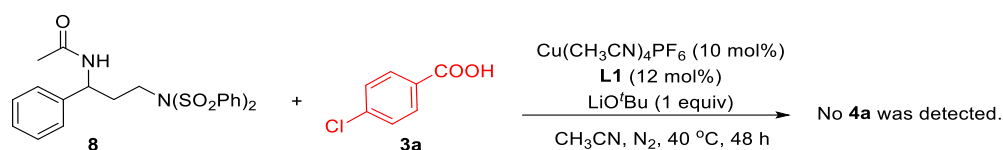

In a nitrogen-filled glove box, a flame-dried screw-cap reaction tube equipped with a Teflon-coated magnetic stir bar was charged with  $\text{Cu}(\text{CH}_3\text{CN})_4\text{PF}_6$  (10 mol%), **L1** (12 mol%). Anhydrous acetonitrile (2 mL) was added and the reaction mixture was stirred for 10 min, then **3a** (0.2 mmol) and  $\text{LiO}^t\text{Bu}$  (1 equiv) were added at room temperature. After stirring for 10 min, **8** (0.2 mmol) was added. The tube was sealed with a Thermo Scientific PTFE screw cap equipped with a septum, and removed from the glove box. Then, the sealed tube was then stirred at 40 °C. The reaction was quenched with water, extracted with DCM (3×10 mL), and the combined organic layers were concentrated in vacuo. No **4a** was detected.

### (3) With compound **9** as the substrate

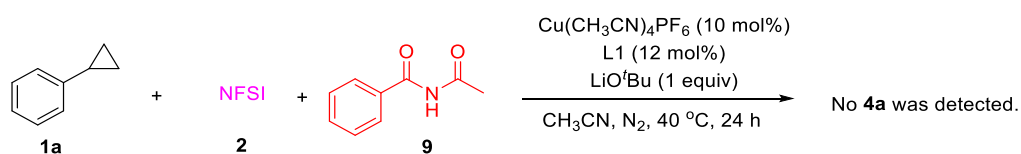

In a nitrogen-filled glove box, a flame-dried screw-cap reaction tube equipped with a Teflon-coated magnetic stir bar was charged with  $\text{Cu}(\text{CH}_3\text{CN})_4\text{PF}_6$  (10 mol%), **L1** (12 mol%). Anhydrous acetonitrile (2 mL) was added and the reaction mixture was stirred for 10 min, then **9** (0.2 mmol) and  $\text{LiO}^t\text{Bu}$  (1 equiv) were added at room temperature. After stirring for 10 min, cyclopropane **1a** (0.4 mmol, 50  $\mu\text{L}$ , 2 equiv) and NFSI (0.5 mmol, 2.5 equiv) was added. The tube was sealed with a Thermo Scientific PTFE screw cap equipped with a septum, and removed from the glove box. Then, the sealed tube was then stirred at 40 °C.

The reaction was quenched with water, extracted with DCM (3×10 mL), and the combined organic layers were concentrated in vacuo. No **4a** was detected.

## V. Analytical data of new compounds

### *N*-acetyl-4-chloro-*N*-(1-phenyl-3-(*N*-(phenylsulfonyl)phenylsulfonamido)propyl)benzamide (**4a**)

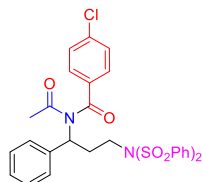

This compound was obtained in 99% (121 mg) yield as white solid by the general procedure. mp. 56 – 57 °C. <sup>1</sup>H NMR (600 MHz, CDCl<sub>3</sub>) δ = 8.02 (d, *J* = 7.8 Hz, 4H), 7.65 (t, *J* = 7.8 Hz, 2H), 7.57 – 7.50 (m, 6H), 7.40 – 7.33 (m, 4H), 7.29 (t, *J* = 7.2 Hz, 2H), 7.24 (t, *J* = 7.8 Hz, 1H), 5.65 (t, *J* = 7.8 Hz, 1H), 3.86 – 3.66 (m, 2H), 2.76 (dd, *J* = 15.6, 7.8 Hz, 2H), 1.85 (s, 3H). <sup>13</sup>C NMR (150 MHz, CDCl<sub>3</sub>) δ = 173.2, 172.6, 139.5, 139.5, 138.0, 134.6, 133.9, 130.2, 129.3, 129.1, 128.4, 128.2, 128.0, 127.9, 57.5, 47.0, 32.2, 27.4. HRMS (ESI-TOF) (*m/z*): Calcd for C<sub>30</sub>H<sub>27</sub>ClN<sub>2</sub>O<sub>6</sub>S<sub>2</sub> ([M + Na]<sup>+</sup>), 633.0891 found 633.0894.

### *N*-acetyl-4-chloro-*N*-(1-(4-chlorophenyl)-3-(*N*-(phenylsulfonyl)phenylsulfonamido)propyl)benzamide (**4b**)

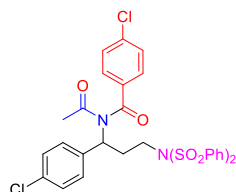

This compound was obtained in 86% (111 mg) yield as white solid by the general procedure, mp 118 – 119 °C. <sup>1</sup>H NMR (600 MHz, CDCl<sub>3</sub>) δ = 8.01 (d, *J* = 8.4 Hz, 4H), 7.66 (t, *J* = 7.8 Hz, 2H), 7.59 – 7.50 (m, 6H), 7.41 (d, *J* = 8.4 Hz, 2H), 7.32 (d, *J* = 8.4 Hz, 2H), 7.29 – 7.24 (m, 2H), 5.60 (t, *J* = 7.8 Hz, 1H), 3.83 – 3.73 (m, 1H), 3.73 – 3.64 (m, 1H), 2.78 – 2.65 (m, 2H), 1.84 (s, 3H). <sup>13</sup>C NMR (150 MHz, CDCl<sub>3</sub>) δ = 173.1, 172.6, 139.9, 139.6, 136.7, 134.5, 134.0, 133.9, 130.2, 129.6, 129.5, 129.2, 128.6, 128.2, 56.9, 6.9, 32.1, 27.7. HRMS (ESI-TOF) (*m/z*): Calcd for C<sub>30</sub>H<sub>26</sub>ClN<sub>2</sub>O<sub>6</sub>S<sub>2</sub> ([M + Na]<sup>+</sup>), 667.0502, found 667.0492.

### Methyl-4-(1-(*N*-acetyl-4-chlorobenzamido)-3-(*N*-(phenylsulfonyl)phenylsulfonamido)propyl)benzoate (**4c**)

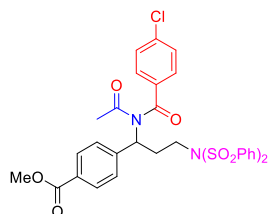

This compound was obtained in 37% (50 mg) yield as colorless oil the general procedure. **<sup>1</sup>H NMR** (600 MHz, CDCl<sub>3</sub>)  $\delta$  = 8.02 (d,  $J$  = 7.8 Hz, 4H), 7.98 (d,  $J$  = 7.8 Hz, 2H), 7.66 (t,  $J$  = 7.2 Hz, 2H), 7.59 – 7.52 (m, 6H), 7.44 – 7.39 (m, 4H), 5.73 – 5.62 (m, 1H), 3.90 (s, 3H), 3.83 – 3.68 (m, 2H), 2.84 – 2.65 (m, 2H), 1.85 (s, 3H). **<sup>13</sup>C NMR** (150 MHz, CDCl<sub>3</sub>)  $\delta$  = 173.0, 172.7, 166.6, 143.3, 139.9, 139.6, 134.4, 134.0, 130.2, 129.7, 129.7, 129.5, 129.2, 128.2, 128.1, 57.1, 52.1, 46.8, 31.9, 27.6. **HRMS** (ESI-TOF) (m/z): Calcd for C<sub>32</sub>H<sub>29</sub>ClN<sub>2</sub>O<sub>8</sub>S<sub>2</sub> ([M + Na]<sup>+</sup>), 691.0946, found 691.0937.

***N*-acetyl-*N*-(1-(4-(*tert*-butyl)phenyl)-3-(*N*-(phenylsulfonyl)phenylsulfonamido)propyl)-4-chlorobenzamide (4d)**

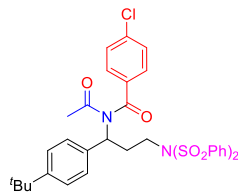

This compound was obtained in 80% (107 mg) yield as white solid by the general procedure. mp. 165 – 166 °C. **<sup>1</sup>H NMR** (600 MHz, CDCl<sub>3</sub>)  $\delta$  = 8.02 (d,  $J$  = 7.8 Hz, 4H), 7.66 (t,  $J$  = 7.8 Hz, 2H), 7.55 (t,  $J$  = 7.8 Hz, 4H), 7.51 (d,  $J$  = 8.4 Hz, 2H), 7.37 (d,  $J$  = 8.4 Hz, 2H), 7.30 (d,  $J$  = 8.4 Hz, 2H), 7.27 – 7.24 (m, 2H), 5.61 (t,  $J$  = 7.8 Hz, 1H), 3.81 – 3.66 (m, 2H), 2.78 – 2.66 (m, 2H), 1.87 (s, 3H), 1.28 (s, 9H). **<sup>13</sup>C NMR** (150 MHz, CDCl<sub>3</sub>)  $\delta$  = 173.4, 172.7, 150.9, 139.7, 139.5, 135.0, 134.7, 133.9, 130.3, 129.3, 129.1, 128.2, 127.8, 125.4, 57.3, 47.1, 34.5, 32.2, 31.2, 27.4. **HRMS** (ESI-TOF) (m/z): Calcd for C<sub>34</sub>H<sub>35</sub>ClN<sub>2</sub>O<sub>6</sub>S<sub>2</sub> ([M + Na]<sup>+</sup>), 689.1517, found 689.1511.

***N*-acetyl-4-chloro-*N*-(3-(*N*-(phenylsulfonyl)phenylsulfonamido)-1-(*p*-tolyl)propyl)benzamide (4e)**

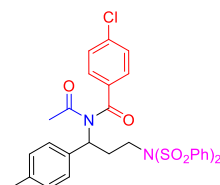

This compound was obtained in 32% (40 mg) yield as white solid by the general procedure. mp. 56 – 57 °C. **<sup>1</sup>H NMR** (600 MHz, CDCl<sub>3</sub>)  $\delta$  = 8.03 (d,  $J$  = 7.8 Hz, 4H), 7.66 (t,  $J$  = 7.8 Hz, 2H), 7.55 (t,  $J$  = 7.8 Hz, 4H), 7.52 (d,  $J$  = 7.8 Hz, 2H), 7.38 (d,  $J$  = 8.4 Hz, 2H), 7.23 (d,  $J$  = 7.8 Hz, 2H), 7.10 (d,  $J$  = 7.8 Hz, 2H), 5.61 (t,  $J$  = 7.8 Hz, 1H), 3.83 – 3.66 (m, 2H), 2.73 (dd,  $J$  = 15.6, 7.8 Hz, 2H), 2.30 (s, 3H), 1.85 (s, 3H). **<sup>13</sup>C NMR** (150 MHz, CDCl<sub>3</sub>)  $\delta$  = 173.3, 172.6, 139.7, 139.6, 137.8, 135.0, 134.8, 133.9, 130.3, 129.3, 129.1, 128.2, 128.1, 57.4, 47.1, 32.3, 27.5, 21.1. **HRMS** (ESI-TOF) (m/z): Calcd for C<sub>31</sub>H<sub>29</sub>ClN<sub>2</sub>O<sub>6</sub>S<sub>2</sub> ([M + Na]<sup>+</sup>), 647.1048, found 647.1037.

**3-(*N*-(phenylsulfonyl)phenylsulfonamido)-1-(*p*-tolyl)propyl 4-chlorobenzoate (4e')**



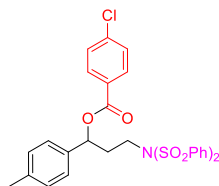

This compound was obtained in 24% (28 mg) yield as white solid by the general procedure. mp. 47 – 48 °C. **<sup>1</sup>H NMR** (600 MHz, CDCl<sub>3</sub>)  $\delta$  8.01 = (d,  $J$  = 7.8 Hz, 2H), 7.93 (d,  $J$  = 8.4 Hz, 4H), 7.64 (t,  $J$  = 7.2 Hz, 2H), 7.51 (t,  $J$  = 7.2 Hz, 4H), 7.43 (d,  $J$  = 8.4 Hz, 2H), 7.23 (d,  $J$  = 7.8 Hz, 2H), 7.17 (d,  $J$  = 7.8 Hz, 2H), 5.90 (dd,  $J$  = 8.4, 4.8 Hz, 1H), 3.85 – 3.69 (m, 2H), 2.53 – 2.43 (m, 1H), 2.39 – 2.29 (m, 4H). **<sup>13</sup>C NMR** (125 MHz, CDCl<sub>3</sub>)  $\delta$  = 164.8, 139.6, 139.5, 138.3, 136.0, 133.9, 131.1, 129.4, 129.1, 128.8, 128.5, 128.2, 126.3, 74.1, 45.7, 36.4, 21.2. **HRMS** (ESI-TOF) ( $m/z$ ): Calcd for C<sub>29</sub>H<sub>26</sub>ClNO<sub>6</sub>S<sub>2</sub> ([M + Na]<sup>+</sup>), 606.0782, found 606.0769.

**1-(4-methoxyphenyl)-3-(N-(phenylsulfonyl)phenylsulfonamido)propyl 4-chlorobenzoate (4f')**

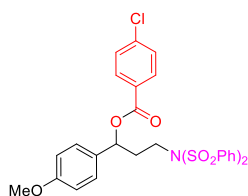

This compound was obtained in 63% (76 mg) yield as white solid by the general procedure. mp. 115 – 116 °C. **<sup>1</sup>H NMR** (600 MHz, CDCl<sub>3</sub>)  $\delta$  = 8.00 (d,  $J$  = 8.4 Hz, 2H), 7.94 (d,  $J$  = 7.8 Hz, 4H), 7.63 (t,  $J$  = 7.2 Hz, 2H), 7.51 (t,  $J$  = 7.8 Hz, 4H), 7.42 (d,  $J$  = 8.4 Hz, 2H), 7.29 (d,  $J$  = 8.4 Hz, 2H), 6.89 (d,  $J$  = 8.4 Hz, 2H), 5.89 (dd,  $J$  = 8.4, 4.8 Hz, 1H), 3.84 – 3.76 (m, 4H), 3.76 – 3.69 (m, 1H), 2.54 – 2.44 (m, 1H), 2.41 – 2.31 (m, 1H). **<sup>13</sup>C NMR** (150 MHz, CDCl<sub>3</sub>)  $\delta$  = 164.8, 159.6, 139.6, 139.5, 133.9, 131.0, 129.1, 128.8, 128.1, 127.8, 114.1, 73.9, 55.3, 45.7, 36.2. **HRMS** (ESI-TOF) ( $m/z$ ): Calcd for C<sub>29</sub>H<sub>26</sub>ClNO<sub>7</sub>S<sub>2</sub> ([M + Na]<sup>+</sup>), 622.0731, found 622.0670.

**N-acetyl-4-chloro-N-(1-(3-chlorophenyl)-3-(N-(phenylsulfonyl)phenylsulfonamido)propyl)benzamide (4g)**

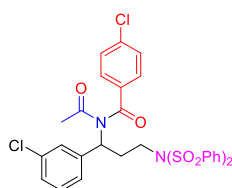

This compound was obtained in 72% (93 mg) yield as colorless oil by the general procedure. **<sup>1</sup>H NMR** (600 MHz, CDCl<sub>3</sub>)  $\delta$  = 8.02 (d,  $J$  = 7.8 Hz, 4H), 7.67 (t,  $J$  = 7.2 Hz, 2H), 7.59 – 7.53 (m, 6H), 7.42 (d,  $J$  = 8.4 Hz, 2H), 7.34 (s, 1H), 7.28 – 7.21 (m, 4H), 5.59 (t,  $J$  = 7.8 Hz, 1H), 3.83 – 3.74 (m, 1H), 3.74 – 3.65 (m, 1H), 2.78 – 2.60 (m, 2H), 1.85 (s, 3H). **<sup>13</sup>C NMR** (125 MHz, CDCl<sub>3</sub>)  $\delta$  = 173.0, 172.6, 140.3, 139.9, 139.6, 134.5, 134.4, 134.0, 130.3, 129.7, 129.5, 129.2, 128.4, 128.2, 126.3, 57.0, 46.8, 32.0, 27.6. **HRMS** (ESI-TOF) ( $m/z$ ): Calcd for C<sub>30</sub>H<sub>26</sub>Cl<sub>2</sub>N<sub>2</sub>O<sub>6</sub>S<sub>2</sub> ([M + Na]<sup>+</sup>), 667.0502, found 667.0492.

***N*-acetyl-4-chloro-*N*-(3-(*N*-(phenylsulfonyl)phenylsulfonamido)-1-(*m*-tolyl)propyl)benzamide (4h)**

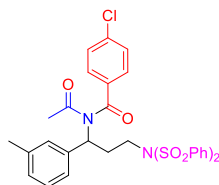

This compound was obtained in 81% (101 mg) yield as white solid by the general procedure. mp. 58 – 59 °C. **<sup>1</sup>H NMR** (600 MHz, CDCl<sub>3</sub>)  $\delta$  = 8.02 (d,  $J$  = 8.4 Hz, 4H), 7.66 (t,  $J$  = 7.2 Hz, 2H), 7.56 (t,  $J$  = 7.8 Hz, 4H), 7.52 (d,  $J$  = 7.8 Hz, 2H), 7.38 (d,  $J$  = 7.8 Hz, 2H), 7.18 (t,  $J$  = 7.8 Hz, 1H), 7.14 (s, 2H), 7.05 (d,  $J$  = 7.8 Hz, 1H), 5.61 (t,  $J$  = 7.8 Hz, 1H), 3.85 – 3.65 (m, 2H), 2.73 (dd,  $J$  = 15.6, 7.8 Hz, 2H), 2.31 (s, 3H), 1.87 (s, 3H). **<sup>13</sup>C NMR** (150 MHz, CDCl<sub>3</sub>)  $\delta$  = 173.4, 172.7, 139.7, 139.6, 138.1, 138.0, 134.8, 133.9, 130.3, 129.3, 129.1, 128.8, 128.7, 128.4, 128.3, 125.1, 57.5, 47.1, 32.3, 27.4, 21.4. **HRMS** (ESI-TOF) ( $m/z$ ): Calcd for C<sub>31</sub>H<sub>29</sub>ClN<sub>2</sub>O<sub>6</sub>S<sub>2</sub> ([M + Na]<sup>+</sup>), 6647.1048, found 647.1017.

***N*-acetyl-4-chloro-*N*-(1-(2-chlorophenyl)-3-(*N*-(phenylsulfonyl)phenylsulfonamido)propyl)benzamide (4i)**

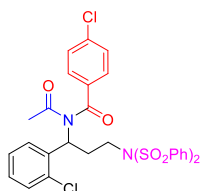

This compound was obtained in 82% (106 mg) yield as white solid by the general procedure. mp. 84 – 85 °C. **<sup>1</sup>H NMR** (600 MHz, CDCl<sub>3</sub>)  $\delta$  = 8.03 (d,  $J$  = 7.8 Hz, 4H), 7.66 (t,  $J$  = 7.8 Hz, 2H), 7.62 – 7.53 (m, 7H), 7.38 (d,  $J$  = 8.4 Hz, 2H), 7.33 (d,  $J$  = 7.8 Hz, 1H), 7.26 (t,  $J$  = 7.8 Hz, 1H), 7.20 (t,  $J$  = 7.8 Hz, 1H), 5.84 (t,  $J$  = 7.8 Hz, 1H), 3.89 – 3.72 (m, 2H), 2.89 – 2.70 (m, 2H), 1.90 (s, 3H). **<sup>13</sup>C NMR** (150 MHz, CDCl<sub>3</sub>)  $\delta$  = 173.3, 171.8, 139.7, 139.6, 134.9, 134.6, 134.2, 133.9, 130.8, 130.4, 129.6, 129.4, 129.2, 129.1, 128.2, 126.6, 54.9, 46.8, 32.1, 27.2. **HRMS** (ESI-TOF) ( $m/z$ ): Calcd for C<sub>30</sub>H<sub>29</sub>Cl<sub>2</sub>N<sub>2</sub>O<sub>6</sub>S<sub>2</sub> ([M + Na]<sup>+</sup>), 667.0502, found 667.0492.

***N*-acetyl-4-chloro-*N*-(1-(2-isopropylphenyl)-3-(*N*-(phenylsulfonyl)phenylsulfonamido)propyl)benzamide (4j)**

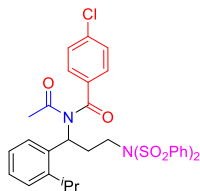

This compound was obtained in 83% (108 mg) yield as white solid by the general procedure. mp. 58 – 59 °C. **<sup>1</sup>H NMR** (600 MHz, CDCl<sub>3</sub>)  $\delta$  = 8.02 (d,  $J$  = 8.4 Hz, 4H), 7.65 (t,  $J$  = 7.2 Hz, 2H), 7.55 (t,  $J$  = 7.8 Hz, 4H), 7.45 (d,  $J$  = 7.8 Hz, 2H), 7.32 (t,  $J$  = 8.4 Hz, 3H), 7.26 (d,  $J$  = 8.4 Hz, 1H), 7.21 (t,  $J$  = 7.8 Hz, 1H), 7.07 (t,  $J$  = 7.2 Hz, 1H), 5.99 (t,  $J$  = 7.8 Hz, 1H), 3.79 – 3.68 (m, 2H), 3.31 – 3.22 (m, 1H), 2.81 – 2.73 (m, 1H), 2.72 – 2.62 (m, 1H), 1.87 (s, 3H), 1.28 (d,  $J$  = 6.6 Hz, 3H), 1.22 (d,  $J$  = 6.6 Hz, 3H). **<sup>13</sup>C NMR** (150 MHz, CDCl<sub>3</sub>)  $\delta$  = 173.2, 171.9, 147.5, 139.8, 139.7, 134.7, 133.9, 133.4, 130.3,

129.18, 129.1, 128.7, 128.5, 128.2, 125.6, 125.5, 53.2, 47.1, 33.7, 28.1, 27.0, 25.4, 23.0. **HRMS** (ESI-TOF) (m/z): Calcd for  $C_{33}H_{33}ClN_2O_6S_2$  ( $[M + Na]^+$ ), 65.1361, found 675.1363.

***N*-acetyl-4-chloro-*N*-(3-(*N*-(phenylsulfonyl)phenylsulfonamido)-1-(*o*-tolyl)propyl)benzamide (4k)**

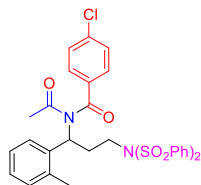

This compound was obtained in 95% (119 mg) yield as white solid by the general procedure. mp. 96 – 97 °C. **<sup>1</sup>H NMR** (600 MHz,  $CDCl_3$ )  $\delta$  = 8.02 (d,  $J$  = 7.8 Hz, 4H), 7.65 (t,  $J$  = 7.8 Hz, 2H), 7.55 (t,  $J$  = 7.8 Hz, 4H), 7.43 (d,  $J$  = 8.4 Hz, 2H), 7.33 (d,  $J$  = 8.4 Hz, 2H), 7.27 (d,  $J$  = 7.8 Hz, 1H), 7.15 – 7.11 (m, 2H), 7.10 – 7.06 (m, 1H), 5.87 (dd,  $J$  = 8.4, 6.6 Hz, 1H), 3.82 – 3.69 (m, 2H), 2.81 – 2.71 (m, 1H), 2.69 – 2.62 (m, 1H), 2.35 (s, 3H), 1.90 (s, 3H). **<sup>13</sup>C NMR** (150 MHz,  $CDCl_3$ )  $\delta$  = 173.4, 172.2, 139.7, 139.6, 136.8, 135.2, 134.7, 133.9, 130.7, 130.2, 129.2, 129.1, 128.5, 128.2, 128.1, 125.8, 54.0, 47.0, 33.2, 26.8, 19.5. **HRMS** (ESI-TOF) (m/z): Calcd for  $C_{31}H_{29}ClN_2O_6S_2$  ( $[M + Na]^+$ ), 647.1048, found 647.1063.

***N*-(1-([1,1'-biphenyl]-2-yl)-3-(*N*-(phenylsulfonyl)phenylsulfonamido)propyl)-*N*-acetyl-4-chlorobenzamide (4l)**

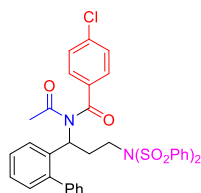

This compound was obtained in 78% (107 mg) yield as white solid by the general procedure. mp. 64 – 65 °C. **<sup>1</sup>H NMR** (600 MHz,  $CDCl_3$ )  $\delta$  = 7.98 – 7.92 (m, 4H), 7.66 – 7.61 (m, 3H), 7.52 (t,  $J$  = 7.8 Hz, 4H), 7.43 – 7.38 (m, 5H), 7.34 – 7.32 (m, 2H), 7.32 – 7.27 (m, 4H), 7.19 – 7.14 (m, 1H), 5.75 (dd,  $J$  = 9.0, 6.0 Hz, 1H), 3.65 – 3.49 (m, 2H), 2.74 – 2.56 (m, 2H), 1.70 (s, 3H). **<sup>13</sup>C NMR** (150 MHz,  $CDCl_3$ )  $\delta$  = 172.8, 172.5, 142.1, 140.5, 139.5, 139.4, 135.8, 134.4, 133.8, 130.5, 130.3, 129.2, 129.1, 129.0, 128.4, 128.4, 128.1, 127.8, 127.6, 127.4, 55.3, 46.8, 33.2, 26.7. **HRMS** (ESI-TOF) (m/z): Calcd for  $C_{36}H_{31}ClN_2O_6S_2$  ( $[M + Na]^+$ ), 709.1204, found 729.1204.

***N*-acetyl-4-chloro-*N*-(1-(2,5-dimethylphenyl)-3-(*N*-(phenylsulfonyl)phenylsulfonamido)propyl)benzamide (4m)**

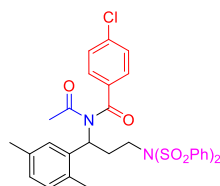

This compound was obtained in 47% (60 mg) yield as white solid by the general procedure. mp. 55 – 56 °C. **<sup>1</sup>H NMR** (600 MHz, CDCl<sub>3</sub>)  $\delta$  = 8.01 (d,  $J$  = 7.8 Hz, 4H), 7.65 (t,  $J$  = 7.2 Hz, 2H), 7.55 (t,  $J$  = 7.8 Hz, 4H), 7.38 (d,  $J$  = 8.4 Hz, 2H), 7.32 (d,  $J$  = 8.4 Hz, 2H), 7.00 (d,  $J$  = 7.8 Hz, 1H), 6.97 (s, 1H), 6.93 (d,  $J$  = 7.2 Hz, 1H), 5.87 – 5.76 (m, 1H), 3.80 – 3.70 (m, 2H), 2.77 – 2.68 (m, 1H), 2.68 – 2.57 (m, 1H), 2.28 (s, 3H), 2.20 (s, 3H), 1.95 (s, 3H). **<sup>13</sup>C NMR** (150 MHz, CDCl<sub>3</sub>)  $\delta$  = 173.6, 172.2, 139.6, 139.4, 135.2, 134.8, 134.8, 133.9, 133.6, 130.6, 130.1, 129.2, 129.1, 129.0, 128.8, 128.2, 53.8, 47.0, 33.2, 26.6, 21.0, 19.0. **HRMS** (ESI-TOF) ( $m/z$ ): Calcd for C<sub>32</sub>H<sub>31</sub>ClN<sub>2</sub>O<sub>6</sub>S<sub>2</sub> ([M + Na]<sup>+</sup>), 661.1204, found 661.1200.

***N*-acetyl-4-bromo-*N*-(1-phenyl-3-(*N*-(phenylsulfonyl)phenylsulfonamido)propyl)benzamide (5a)**

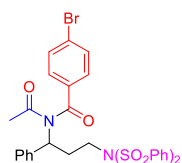

This compound was obtained in 99% (130 mg) yield as white solid by the general procedure. mp. 117 – 118 °C. **<sup>1</sup>H NMR** (600 MHz, CDCl<sub>3</sub>)  $\delta$  = 8.02 (dd,  $J$  = 8.4, 1.2 Hz, 4H), 7.66 (t,  $J$  = 7.8 Hz, 2H), 7.59 – 7.53 (m, 6H), 7.46 – 7.41 (m, 2H), 7.35 (d,  $J$  = 7.2 Hz, 2H), 7.30 (t,  $J$  = 7.2 Hz, 2H), 7.25 – 7.22 (m, 1H), 5.64 (t,  $J$  = 7.8 Hz, 1H), 3.84 – 3.68 (m, 2H), 2.79 – 2.67 (m, 2H), 1.86 (s, 3H). **<sup>13</sup>C NMR** (150 MHz, CDCl<sub>3</sub>)  $\delta$  = 173.4, 172.7, 139.7, 138.1, 135.2, 133.9, 132.3, 130.3, 129.2, 128.5, 128.2, 128.2, 128.1, 128.0, 57.5, 47.0, 32.2, 27.5. **HRMS** (ESI-TOF) ( $m/z$ ): Calcd for C<sub>30</sub>H<sub>27</sub>BrN<sub>2</sub>O<sub>6</sub>S ([M + Na]<sup>+</sup>), 678.4690, found 678.4692.

***N*-acetyl-4-iodo-*N*-(1-phenyl-3-(*N*-(phenylsulfonyl)phenylsulfonamido)propyl)benzamide (5b)**

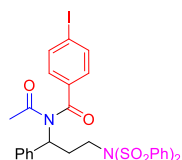

This compound was obtained in 94% (132 mg) yield as white solid by the general procedure. mp. 57 – 58 °C. **<sup>1</sup>H NMR** (600 MHz, CDCl<sub>3</sub>)  $\delta$  = 8.02 (d,  $J$  = 7.8 Hz, 4H), 7.76 (d,  $J$  = 7.8 Hz, 2H), 7.65 (t,  $J$  = 7.2 Hz, 2H), 7.55 (t,  $J$  = 7.8 Hz, 4H), 7.35 (d,  $J$  = 7.8 Hz, 2H), 7.32 – 7.27 (m, 4H), 7.24 (t,  $J$  = 7.8 Hz, 1H), 5.64 (t,  $J$  = 7.8 Hz, 1H), 3.84 – 3.67 (m, 2H), 2.75 (dd,  $J$  = 15.6, 7.8 Hz, 2H), 1.86 (s, 3H). **<sup>13</sup>C NMR** (150 MHz, CDCl<sub>3</sub>)  $\delta$  = 173.6, 172.6, 139.6, 138.2, 138.1, 135.7, 133.9, 130.1, 129.1, 128.5, 128.2, 128.1, 128.0, 100.8, 57.5, 47.0, 32.2, 27.5. **HRMS** (ESI-TOF) ( $m/z$ ): Calcd for C<sub>30</sub>H<sub>27</sub>IN<sub>2</sub>O<sub>6</sub>S<sub>2</sub> ([M + Na]<sup>+</sup>), 725.0247, found 725.0258.

***N*-acetyl-4-formyl-*N*-(1-phenyl-3-(*N*-(phenylsulfonyl)phenylsulfonamido)propyl)benzamide (5c)**

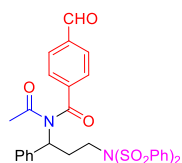

This compound was obtained in 91% (110 mg) yield as white solid by the general procedure. mp. 32 – 33 °C. **<sup>1</sup>H NMR** (600 MHz, CDCl<sub>3</sub>)  $\delta$  = 10.06 (s, 1H), 8.02 (d,  $J$  = 7.8 Hz, 4H), 7.91 (d,  $J$  = 7.8 Hz, 2H), 7.71 (d,  $J$  = 7.8 Hz, 2H), 7.66 (t,  $J$  = 7.2 Hz, 2H), 7.56 (t,  $J$  = 7.8 Hz, 4H), 7.36 (d,  $J$  = 7.8 Hz, 2H), 7.31 (t,  $J$  = 7.2 Hz, 2H), 7.28 – 7.23 (m, 1H), 5.67 (t,  $J$  = 7.2 Hz, 1H), 3.84 – 3.71 (m, 2H), 2.85 – 2.71 (m, 2H), 1.88 (s, 3H). **<sup>13</sup>C NMR** (150 MHz, CDCl<sub>3</sub>)  $\delta$  = 191.0, 173.3, 172.9, 141.3, 139.6, 138.7, 138.0, 134.0, 130.0, 129.2, 129.1, 128.5, 128.2, 128.1, 128.0, 57.5, 47.0, 32.2, 27.5. **HRMS** (ESI-TOF) ( $m/z$ ): Calcd for C<sub>31</sub>H<sub>28</sub>N<sub>2</sub>O<sub>7</sub>S<sub>2</sub> ([M + Na]<sup>+</sup>), 627.1330, found 627.1332.

***N*,4-diacetyl-*N*-(1-phenyl-3-(*N*-(phenylsulfonyl)phenylsulfonamido)propyl)benzamide (5d)**

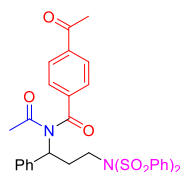

This compound was obtained in 92% (114 mg) yield as colorless oil the general procedure. **<sup>1</sup>H NMR** (600 MHz, CDCl<sub>3</sub>)  $\delta$  = 8.03 (d,  $J$  = 8.4 Hz, 4H), 7.97 (d,  $J$  = 8.4 Hz, 2H), 7.69 – 7.63 (m, 4H), 7.56 (t,  $J$  = 7.8 Hz, 4H), 7.36 (d,  $J$  = 7.8 Hz, 2H), 7.31 (t,  $J$  = 7.8 Hz, 2H), 7.25 (t,  $J$  = 7.2 Hz, 1H), 5.67 (t,  $J$  = 7.8 Hz, 1H), 3.87 – 3.68 (m, 2H), 2.78 (dd,  $J$  = 15.6, 7.8 Hz, 2H), 2.61 (s, 3H), 1.86 (s, 3H). **<sup>13</sup>C NMR** (150 MHz, CDCl<sub>3</sub>)  $\delta$  = 196.9, 173.4, 172.9, 140.1, 139.9, 139.6, 138.0, 133.9, 129.1, 128.8, 128.7, 128.5, 128.2, 128.0, 57.5, 47.0, 32.1, 27.6, 26.8. **HRMS** (ESI-TOF) ( $m/z$ ): Calcd for C<sub>32</sub>H<sub>30</sub>N<sub>2</sub>O<sub>7</sub>S<sub>2</sub> ([M + Na]<sup>+</sup>), 641.1387, found 641.1392.

***N*-acetyl-4-nitro-*N*-(1-phenyl-3-(*N*-(phenylsulfonyl)phenylsulfonamido)propyl)benzamide (5e)**

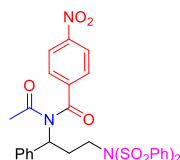

This compound was obtained in 91% (113 mg) yield as white solid by the general procedure. mp. 57 – 58 °C. **<sup>1</sup>H NMR** (600 MHz, CDCl<sub>3</sub>)  $\delta$  = 8.24 (d,  $J$  = 8.4 Hz, 2H), 8.01 (d,  $J$  = 7.8 Hz, 4H), 7.74 – 7.63 (m, 4H), 7.56 (t,  $J$  = 7.8 Hz, 4H), 7.32 (d,  $J$  = 4.2 Hz, 4H), 7.29 – 7.26 (m, 1H), 5.63 (t,  $J$  = 7.8 Hz, 1H), 3.77 (t,  $J$  = 7.8 Hz, 2H), 2.89 – 2.68 (m, 2H), 1.95 (s, 3H). **<sup>13</sup>C NMR** (150 MHz, CDCl<sub>3</sub>)  $\delta$  = 173.0, 172.5, 149.8, 141.7, 139.5, 137.8, 134.0, 129.3, 129.2, 128.7, 128.2, 128.2, 127.9, 124.0, 57.6, 46.9, 32.3, 27.3. **HRMS** (ESI-TOF) ( $m/z$ ): Calcd for C<sub>30</sub>H<sub>27</sub>N<sub>3</sub>O<sub>8</sub>S<sub>2</sub> ([M + Na]<sup>+</sup>), 644.1132, found 644.1140.

***N*-acetyl-4-cyano-*N*-(1-phenyl-3-(*N*-(phenylsulfonyl)phenylsulfonamido)propyl)benzamide (5f)**

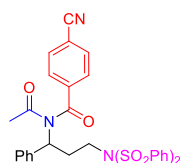

This compound was obtained in 98% (118 mg) yield as white solid by the general procedure. mp. 54 – 55 °C. **<sup>1</sup>H NMR** (600 MHz, CDCl<sub>3</sub>)  $\delta$  = 8.03 – 7.98 (m, 4H), 7.70 – 7.61 (m, 6H), 7.55 (t,  $J$  = 7.8 Hz, 4H), 7.33 – 7.29 (m, 4H), 7.28 – 7.24 (m, 1H), 5.63 (dd,  $J$  = 8.4, 6.6 Hz, 1H), 3.76 (t,  $J$  = 7.8 Hz, 2H), 2.84 – 2.65 (m, 2H), 1.91 (s, 3H). **<sup>13</sup>C NMR** (150 MHz, CDCl<sub>3</sub>)  $\delta$  = 172.9, 172.7, 140.1, 139.5, 137.8, 134.0, 132.6, 129.2, 128.9, 128.6, 128.2, 127.9, 117.5, 116.0, 57.5, 46.9, 32.2, 27.3. **HRMS** (ESI-TOF) (m/z): Calcd for C<sub>31</sub>H<sub>27</sub>N<sub>3</sub>O<sub>6</sub>S<sub>2</sub> ([M + Na]<sup>+</sup>), 624.1233, found 624.1229.

***N*-acetyl-*N*-(1-phenyl-3-(*N*-(phenylsulfonyl)phenylsulfonamido)propyl)benzamide (5g)**

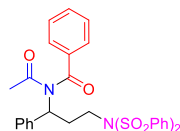

This compound was obtained in 81% (93 mg) yield as colorless oil by the general procedure. **<sup>1</sup>H NMR** (600 MHz, CDCl<sub>3</sub>)  $\delta$  = 8.03 (d,  $J$  = 8.4 Hz, 4H), 7.64 (t,  $J$  = 7.8 Hz, 2H), 7.58 (d,  $J$  = 7.8 Hz, 2H), 7.57 – 7.51 (m, 5H), 7.44 – 7.36 (m, 4H), 7.30 (t,  $J$  = 7.2 Hz, 2H), 7.24 (t,  $J$  = 7.8 Hz, 1H), 5.69 (t,  $J$  = 7.8 Hz, 1H), 3.88 – 3.79 (m, 1H), 3.79 – 3.70 (m, 1H), 2.86 – 2.69 (m, 2H), 1.81 (s, 3H). **<sup>13</sup>C NMR** (150 MHz, CDCl<sub>3</sub>)  $\delta$  = 174.3, 172.9, 139.7, 138.3, 136.4, 133.9, 133.1, 129.1, 129.0, 128.9, 128.4, 128.2, 128.2, 127.8, 57.4, 47.1, 32.1, 27.6. **HRMS** (ESI-TOF) (m/z): Calcd for C<sub>30</sub>H<sub>28</sub>N<sub>2</sub>O<sub>6</sub>S<sub>2</sub> ([M + Na]<sup>+</sup>), 599.1281, found 599.1285.

***N*-acetyl-4-methoxy-*N*-(1-phenyl-3-(*N*-(phenylsulfonyl)phenylsulfonamido)propyl)benzamide (5h)**

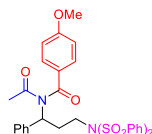

This compound was obtained in 46% (56 mg) yield as colorless oil by the general procedure. **<sup>1</sup>H NMR** (600 MHz, CDCl<sub>3</sub>)  $\delta$  = 8.03 (d,  $J$  = 7.8 Hz, 4H), 7.65 (t,  $J$  = 7.2 Hz, 2H), 7.59 – 7.52 (m, 6H), 7.38 (d,  $J$  = 7.8 Hz, 2H), 7.28 (t,  $J$  = 7.8 Hz, 2H), 7.23 (t,  $J$  = 7.2 Hz, 1H), 6.88 (d,  $J$  = 9.0 Hz, 2H), 5.69 – 5.62 (m, 1H), 3.88 – 3.79 (m, 4H), 3.77 – 3.68 (m, 1H), 2.84 – 2.66 (m, 2H), 1.83 (s, 3H). **<sup>13</sup>C NMR** (150 MHz, CDCl<sub>3</sub>)  $\delta$  = 173.7, 172.3, 163.8, 139.8, 138.4, 133.9, 131.6, 129.1, 128.5, 128.4, 128.3, 128.3, 127.8, 114.3, 57.4, 55.5, 47.2, 32.3, 27.2. **HRMS** (ESI-TOF) (m/z): Calcd for C<sub>31</sub>H<sub>30</sub>N<sub>2</sub>O<sub>6</sub>S<sub>2</sub> ([M + Na]<sup>+</sup>), 629.1387, found 629.1376.

***N*-acetyl-4-ethyl-*N*-(1-phenyl-3-(*N*-(phenylsulfonyl)phenylsulfonamido)propyl)benzamide (5i)**

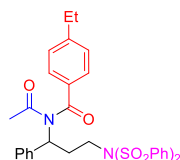

This compound was obtained in 74% (90 mg) yield as white solid by the general procedure, mp 115 – 116 °C. **<sup>1</sup>H NMR** (600 MHz, CDCl<sub>3</sub>)  $\delta$  = 8.04 (d,  $J$  = 7.8 Hz, 4H), 7.65 (t,  $J$  = 7.2 Hz, 2H), 7.59 – 7.48 (m, 6H), 7.39 (d,  $J$  = 7.2 Hz, 2H), 7.29 (t,  $J$  = 7.8 Hz, 2H), 7.25 – 7.20 (m, 3H), 5.67 (t,  $J$  = 7.2 Hz, 1H),

3.88 – 3.78 (m, 1H), 3.78 – 3.68 (m, 1H), 2.85 – 2.72 (m, 2H), 2.68 (q,  $J = 7.2$  Hz, 2H), 1.82 (s, 3H), 1.23 (t,  $J = 7.2$  Hz, 3H).  $^{13}\text{C}$  NMR (150 MHz,  $\text{CDCl}_3$ )  $\delta = 174.3, 172.8, 150.3, 139.8, 138.4, 133.9, 133.8, 129.2, 129.1, 128.5, 128.4, 128.2, 128.2, 127.8, 57.4, 47.2, 32.2, 28.9, 27.5, 15.0$ . HRMS (ESI-TOF) ( $m/z$ ): Calcd for  $\text{C}_{32}\text{H}_{32}\text{N}_2\text{O}_6\text{S}_2$  ( $[\text{M} + \text{Na}]^+$ ), 627.1203, found 627.1205.

***N*-acetyl-3-chloro-*N*-(1-phenyl-3-(*N*-(phenylsulfonyl)phenylsulfonamido)propyl)benzamide (5j)**

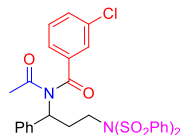

This compound was obtained in 81% (99 mg) yield as white solid by the general procedure. mp. 33 – 34 °C.  $^1\text{H}$  NMR (600 MHz,  $\text{CDCl}_3$ )  $\delta = 8.03$  (d,  $J = 8.4$  Hz, 4H), 7.65 (t,  $J = 7.2$  Hz, 2H), 7.58 – 7.53 (m, 5H), 7.50 (d,  $J = 7.8$  Hz, 1H), 7.42 (d,  $J = 7.8$  Hz, 1H), 7.38 – 7.33 (m, 3H), 7.31 (t,  $J = 7.8$  Hz, 2H), 7.27 – 7.23 (m, 1H), 5.66 (t,  $J = 7.8$  Hz, 1H), 3.84 – 3.67 (m, 2H), 2.81 – 2.67 (m, 2H), 1.87 (s, 3H).  $^{13}\text{C}$  NMR (150 MHz,  $\text{CDCl}_3$ )  $\delta = 172.9, 172.7, 139.6, 138.00, 137.99, 135.2, 133.9, 133.0, 130.2, 129.1, 128.8, 128.5, 128.2, 128.1, 128.0, 126.7, 57.5, 47.0, 32.1, 27.5$ . HRMS (ESI-TOF) ( $m/z$ ): Calcd for  $\text{C}_{30}\text{H}_{27}\text{ClN}_2\text{O}_6\text{S}_2$  ( $[\text{M} + \text{Na}]^+$ ), 633.0891, found 633.0893.

***N*-acetyl-3-methyl-*N*-(1-phenyl-3-(*N*-(phenylsulfonyl)phenylsulfonamido)propyl)benzamide (5k)**

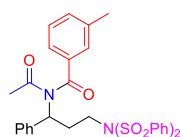

This compound was obtained in 53% (63 mg) yield as white solid by the general procedure. mp. 77 – 78 °C.  $^1\text{H}$  NMR (600 MHz,  $\text{CDCl}_3$ )  $\delta = 8.04$  (d,  $J = 8.2$  Hz, 4H), 7.65 (t,  $J = 7.8$  Hz, 2H), 7.55 (t,  $J = 7.8$  Hz, 4H), 7.43 – 7.33 (m, 5H), 7.33 – 7.27 (m, 3H), 7.24 (t,  $J = 7.2$  Hz, 1H), 5.68 (t,  $J = 7.8$  Hz, 1H), 3.89 – 3.79 (m, 1H), 3.79 – 3.66 (m, 1H), 2.85 – 2.69 (m, 2H), 2.35 (s, 3H), 1.82 (s, 3H).  $^{13}\text{C}$  NMR (150 MHz,  $\text{CDCl}_3$ )  $\delta = 174.5, 173.0, 139.7, 139.1, 138.3, 136.4, 133.9, 133.9, 129.4, 129.1, 128.8, 128.4, 128.2, 128.2, 127.8, 126.1, 57.4, 47.2, 32.1, 27.6, 21.2$ . HRMS (ESI-TOF) ( $m/z$ ): Calcd for  $\text{C}_{31}\text{H}_{32}\text{N}_2\text{O}_6\text{S}_2$  ( $[\text{M} + \text{Na}]^+$ ), 613.1108, found 627.1105.

***N*-acetyl-2-chloro-*N*-(1-phenyl-3-(*N*-(phenylsulfonyl)phenylsulfonamido)propyl)benzamide (5l)**

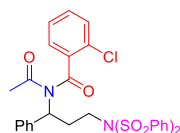

This compound was obtained in 45% (55 mg) yield as white solid by the general procedure. mp. 43 – 44 °C.  $^1\text{H}$  NMR (600 MHz,  $\text{CDCl}_3$ )  $\delta = 8.03$  (d,  $J = 8.4$  Hz, 4H), 7.66 (t,  $J = 7.2$  Hz, 2H), 7.56 (t,  $J = 7.8$  Hz, 4H), 7.45 – 7.36 (m, 4H), 7.32 (t,  $J = 7.2$  Hz, 2H), 7.30 – 7.24 (m, 2H), 7.21 (d,  $J = 7.8$  Hz, 1H), 5.61 (t,  $J = 7.2$  Hz, 1H), 3.81 – 3.68 (m, 2H), 2.90 – 2.79 (m, 1H), 2.79 – 2.67 (m, 1H), 1.96 (s,

3H). **<sup>13</sup>C NMR** (150 MHz, CDCl<sub>3</sub>)  $\delta$  = 173.4, 170.5, 139.7, 137.9, 136.4, 133.9, 131.9, 131.3, 130.5, 129.2, 128.6, 128.4, 128.2, 128.2, 127.9, 127.2, 57.0, 47.1, 32.0, 27.2. **HRMS** (ESI-TOF) (m/z): Calcd for C<sub>30</sub>H<sub>27</sub>ClN<sub>2</sub>O<sub>6</sub>S<sub>2</sub> ([M + Na]<sup>+</sup>), 633.0891, found 633.0878.

***N*-acetyl-2,4-dichloro-*N*-(1-phenyl-3-(*N*-(phenylsulfonyl)phenylsulfonamido)propyl)benzamide (5m)**

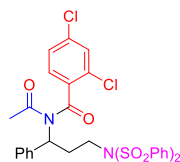

This compound was obtained in 72% (93 mg) yield as colorless oil the general procedure. **<sup>1</sup>H NMR** (600 MHz, CDCl<sub>3</sub>)  $\delta$  = 8.02 (d, *J* = 7.8 Hz, 4H), 7.66 (t, *J* = 7.2 Hz, 2H), 7.56 (t, *J* = 7.8 Hz, 4H), 7.43 (s, 1H), 7.37 – 7.31 (m, 4H), 7.30 – 7.24 (m, 2H), 7.16 (d, *J* = 8.4 Hz, 1H), 5.58 (t, *J* = 7.2 Hz, 1H), 3.79 – 3.67 (m, 2H), 2.90 – 2.79 (m, 1H), 2.75 – 2.65 (m, 1H), 2.00 (s, 3H). **<sup>13</sup>C NMR** (150 MHz, CDCl<sub>3</sub>)  $\delta$  = 173.3, 169.7, 139.6, 137.7, 137.4, 134.9, 134.0, 132.2, 130.4, 129.5, 129.2, 128.5, 128.2, 128.1, 128.0, 127.6, 57.0, 47.0, 32.0, 27.1. **HRMS** (ESI-TOF) (m/z): Calcd for C<sub>30</sub>H<sub>26</sub>Cl<sub>2</sub>N<sub>2</sub>O<sub>6</sub>S<sub>2</sub> ([M + Na]<sup>+</sup>), 667.0502, found 667.0500.

***(E)*-*N*-acetyl-*N*-(1-phenyl-3-(*N*-(phenylsulfonyl)phenylsulfonamido)propyl)but-2-enamide (5n)**

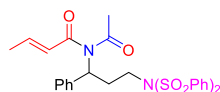

This compound was obtained in 57% (62 mg) yield as white solid the general procedure, mp. 110 – 111 °C. **<sup>1</sup>H NMR** (600 MHz, CDCl<sub>3</sub>)  $\delta$  = 7.99 (d, *J* = 7.8 Hz, 4H), 7.66 (t, *J* = 7.2 Hz, 2H), 7.55 (t, *J* = 7.8 Hz, 4H), 7.35 – 7.30 (m, 2H), 7.28 – 7.23 (m, 3H), 6.98 – 6.88 (m, 1H), 6.11 (dd, *J* = 15.0, 1.2 Hz, 1H), 5.61 (dd, *J* = 9.0, 6.0 Hz, 1H), 3.80 – 3.73 (m, 1H), 3.73 – 3.64 (m, 1H), 2.76 – 2.66 (m, 1H), 2.65 – 2.52 (m, 1H), 2.28 (s, 3H), 1.86 (dd, *J* = 6.6, 1.2 Hz, 3H). **<sup>13</sup>C NMR** (150 MHz, CDCl<sub>3</sub>)  $\delta$  = 173.4, 170.4, 145.7, 139.6, 138.9, 133.9, 129.1, 128.5, 128.2, 127.6, 127.1, 126.3, 55.4, 47.0, 32.0, 26.7, 18.3. **HRMS** (ESI-TOF) (m/z): Calcd for C<sub>27</sub>H<sub>28</sub>N<sub>2</sub>O<sub>6</sub>S<sub>2</sub> ([M + Na]<sup>+</sup>), 563.1281, found 563.1273.

***N*-acetyl-2-(4-chlorophenyl)-*N*-(1-phenyl-3-(*N*-(phenylsulfonyl)phenylsulfonamido)propyl)acetamide (5o)**

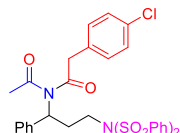

This compound was obtained in 65% (81 mg) yield as colorless oil the general procedure. **<sup>1</sup>H NMR** (600 MHz, CDCl<sub>3</sub>)  $\delta$  = 7.94 (d, *J* = 7.8 Hz, 4H), 7.67 (t, *J* = 7.2 Hz, 2H), 7.54 (t, *J* = 7.8 Hz, 4H), 7.37 – 7.31 (m, 2H), 7.31 – 7.27 (m, 1H), 7.23 – 7.20 (m, 2H), 7.17 (d, *J* = 7.8 Hz, 2H), 6.99 (d, *J* = 8.4 Hz, 2H), 5.60 (dd, *J* = 9.0, 6.6 Hz, 1H), 3.88 (dd, *J* = 37.2, 15.6 Hz, 2H), 3.81 – 3.73 (m, 1H), 3.65 – 3.56 (m, 1H), 2.84 – 2.75 (m, 1H), 2.58 – 2.48 (m, 1H), 2.23 (s, 3H). **<sup>13</sup>C NMR** (150 MHz, CDCl<sub>3</sub>)  $\delta$  = 175.5, 174.5, 139.3, 138.5, 134.1, 133.0, 132.6, 130.9, 129.2, 128.9, 128.6, 128.2, 127.8, 126.7, 55.1,



46.8, 44.3, 32.4, 26.5. **HRMS** (ESI-TOF) ( $m/z$ ): Calcd for  $C_{31}H_{29}ClN_2O_6S_2$  ( $[M + Na]^+$ ), 647.1048, found 647.1019.

***N*-acetyl-2-(11-oxo-6,11-dihydrodibenzo[*b,e*]oxepin-2-yl)-*N*-(1-phenyl-3-(*N*-(phenylsulfonyl)phenylsulfonamido)propyl)acetamide (5p)**

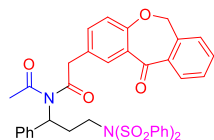

This compound was obtained in 41% (59 mg) yield as white solid by the general procedure. mp. 58 – 59 °C. **<sup>1</sup>H NMR** (600 MHz,  $CDCl_3$ )  $\delta$  = 7.96 (d,  $J$  = 7.8 Hz, 4H), 7.93 (s, 1H), 7.87 (d,  $J$  = 7.8 Hz, 1H), 7.65 (t,  $J$  = 7.8 Hz, 2H), 7.57 – 7.52 (m, 5H), 7.46 (t,  $J$  = 7.8 Hz, 1H), 7.34 (t,  $J$  = 8.4 Hz, 3H), 7.28 (t,  $J$  = 7.2 Hz, 1H), 7.24 – 7.18 (m, 3H), 6.96 (d,  $J$  = 8.4 Hz, 1H), 5.65 – 5.56 (m, 1H), 5.15 (s, 2H), 3.91 (dd,  $J$  = 27.0, 16.2 Hz, 2H), 3.85 – 3.76 (m, 1H), 3.67 – 3.57 (m, 1H), 2.84 – 2.74 (m, 1H), 2.59 – 2.49 (m, 1H), 2.28 (s, 3H). **<sup>13</sup>C NMR** (150 MHz,  $CDCl_3$ )  $\delta$  = 190.6, 175.8, 174.5, 160.4, 140.4, 139.4, 138.6, 136.6, 135.5, 134.1, 132.7, 132.6, 129.5, 129.2, 129.2, 128.9, 128.2, 127.9, 127.8, 127.8, 126.7, 125.1, 121.0, 73.6, 55.2, 46.9, 44.1, 32.4, 26.6. **HRMS** (ESI-TOF) ( $m/z$ ): Calcd for  $C_{39}H_{34}N_2O_8S_2$  ( $[M + Na]^+$ ), 745.1649, found 745.1655.

***N*-acetyl-*N*-(1-phenyl-3-(*N*-(phenylsulfonyl)phenylsulfonamido)propyl)decanamide (5q)**

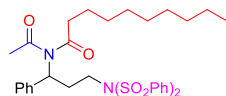

This compound was obtained in 22% (28 mg) yield as colorless oil the general procedure. **<sup>1</sup>H NMR** (600 MHz,  $CDCl_3$ )  $\delta$  = 8.01 – 7.94 (m, 4H), 7.67 (t,  $J$  = 7.8 Hz, 2H), 7.56 (t,  $J$  = 7.8 Hz, 4H), 7.34 (t,  $J$  = 7.8 Hz, 2H), 7.27 (t,  $J$  = 7.2 Hz, 1H), 7.21 (d,  $J$  = 7.8 Hz, 2H), 5.64 (dd,  $J$  = 8.4, 6.6 Hz, 1H), 3.86 – 3.76 (m, 1H), 3.68 – 3.60 (m, 1H), 2.84 – 2.72 (m, 1H), 2.57 – 2.40 (m, 3H), 2.28 (s, 3H), 1.57 – 1.43 (m, 2H), 1.33 – 1.11 (m, 12H), 0.87 (t,  $J$  = 7.2 Hz, 3H). **<sup>13</sup>C NMR** (150 MHz,  $CDCl_3$ )  $\delta$  = 177.9, 174.3, 139.5, 138.9, 134.0, 129.2, 128.7, 128.2, 127.6, 126.7, 54.5, 47.0, 38.7, 32.3, 31.8, 29.4, 29.3, 29.2, 29.0, 26.8, 25.1, 22.6, 14.1. **HRMS** (ESI-TOF) ( $m/z$ ): Calcd for  $C_{33}H_{42}N_2O_6S_2$  ( $[M + Na]^+$ ), 649.2376, found 649.2367.

**4-chloro-*N*-(1-phenyl-3-(*N*-(phenylsulfonyl)phenylsulfonamido)propyl)-*N*-propionylbenzamide (7a)**

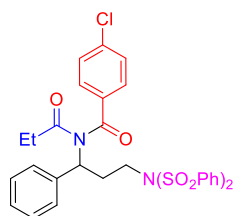

This compound was obtained in 82% (103 mg) yield as white solid by the general procedure. mp. 45 – 46 °C. **<sup>1</sup>H NMR** (600 MHz,  $CDCl_3$ )  $\delta$  = 8.03 (d,  $J$  = 7.8 Hz, 4H), 7.65 (t,  $J$  = 7.2 Hz, 2H), 7.55 (t,  $J$  = 7.8 Hz, 4H), 7.51 (d,  $J$  = 8.4 Hz, 2H), 7.40 – 7.34 (m, 4H), 7.30 (t,  $J$  = 7.8 Hz, 2H), 7.24 (t,  $J$  = 7.2 Hz, 1H), 5.70 – 5.59 (m, 1H), 3.86 – 3.77 (m, 1H), 3.77 – 3.67 (m, 1H), 2.84 – 2.64 (m, 2H), 2.09 – 1.90

(m, 2H), 0.87 (t,  $J = 7.3$  Hz, 3H).  $^{13}\text{C}$  NMR (150 MHz,  $\text{CDCl}_3$ )  $\delta = 177.2, 173.1, 139.7, 139.5, 138.1, 134.8, 133.9, 130.1, 129.3, 129.1, 128.4, 128.2, 128.1, 128.0, 57.6, 47.1, 33.5, 32.3, 9.6$ . HRMS (ESI-TOF) ( $m/z$ ): Calcd for  $\text{C}_{31}\text{H}_{29}\text{ClN}_2\text{O}_6\text{S}_2$  ( $[\text{M} + \text{Na}]^+$ ), 647.1048, found 647.1049.

**4-chloro-*N*-isobutyryl-*N*-(1-phenyl-3-(*N*-(phenylsulfonyl)phenylsulfonamido)propyl)benzamide (7b)**

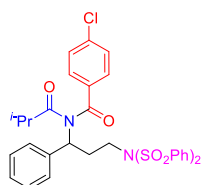

This compound was obtained in 90% (115 mg) yield as white solid by the general procedure. mp. 108 – 109 °C.  $^1\text{H}$  NMR (600 MHz,  $\text{CDCl}_3$ )  $\delta = 8.02$  (d,  $J = 7.8$  Hz, 4H), 7.64 (t,  $J = 7.2$  Hz, 2H), 7.58 – 7.49 (m, 6H), 7.43 – 7.36 (m, 4H), 7.29 (t,  $J = 7.5$  Hz, 2H), 7.24 (t,  $J = 7.2$  Hz, 1H), 5.68 (t,  $J = 7.8$  Hz, 1H), 3.85 – 3.74 (m, 1H), 3.74 – 3.62 (m, 1H), 2.85 – 2.65 (m, 2H), 2.26 – 2.12 (m, 1H), 0.79 (d,  $J = 6.6$  Hz, 3H), 0.75 (d,  $J = 6.6$  Hz, 3H).  $^{13}\text{C}$  NMR (150 MHz,  $\text{CDCl}_3$ )  $\delta = 181.1, 172.8, 139.7, 139.5, 137.7, 134.9, 133.9, 130.2, 129.3, 129.1, 128.6, 128.4, 128.2, 128.1, 57.8, 47.1, 38.6, 32.6, 19.5, 18.8$ . HRMS (ESI-TOF) ( $m/z$ ): Calcd for  $\text{C}_{32}\text{H}_{31}\text{ClN}_2\text{O}_6\text{S}_2$  ( $[\text{M} + \text{Na}]^+$ ), 661.1204, found 661.1186.

**4-chloro-*N*-(1-phenyl-3-(*N*-(phenylsulfonyl)phenylsulfonamido)propyl)-*N*-(2-phenylacetyl)benzamide (7c)**

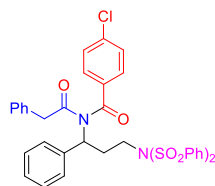

This compound was obtained in 52% (72 mg) yield as white solid by the general procedure. mp. 52 – 53 °C.  $^1\text{H}$  NMR (600 MHz,  $\text{CDCl}_3$ )  $\delta = 7.99$  (d,  $J = 7.8$  Hz, 4H), 7.65 (t,  $J = 7.2$  Hz, 2H), 7.54 (t,  $J = 7.8$  Hz, 4H), 7.44 (d,  $J = 8.4$  Hz, 2H), 7.32 (d,  $J = 7.8$  Hz, 2H), 7.29 (d,  $J = 7.2$  Hz, 2H), 7.26 – 7.21 (m, 3H), 7.18 – 7.12 (m, 3H), 6.82 (d,  $J = 7.2$  Hz, 2H), 5.60 (t,  $J = 7.8$  Hz, 1H), 3.78 – 3.69 (m, 1H), 3.69 – 3.62 (m, 1H), 3.44 (dd,  $J = 25.8, 9.0$  Hz, 2H), 2.77 – 2.66 (m, 2H).  $^{13}\text{C}$  NMR (150 MHz,  $\text{CDCl}_3$ )  $\delta = 174.2, 173.2, 139.7, 139.6, 137.7, 134.6, 133.9, 133.3, 130.3, 129.3, 129.1, 129.0, 128.5, 128.4, 128.3, 128.2, 128.0, 127.2, 58.0, 47.0, 46.0, 32.4$ . HRMS (ESI-TOF) ( $m/z$ ): Calcd for  $\text{C}_{36}\text{H}_{31}\text{ClN}_2\text{O}_6\text{S}_2$  ( $[\text{M} + \text{Na}]^+$ ), 709.1204, found 709.1197.

**4-chloro-*N*-(2-cyclopropylacetyl)-*N*-(1-phenyl-3-(*N*-(phenylsulfonyl)phenylsulfonamido)propyl)benzamide (7d)**

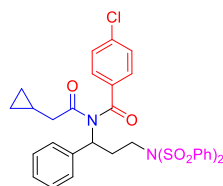

This compound was obtained in 32% (42 mg) yield as colorless oil the general procedure. **<sup>1</sup>H NMR** (600 MHz, CDCl<sub>3</sub>)  $\delta$  = 8.03 (d,  $J$  = 7.8 Hz, 4H), 7.66 (t,  $J$  = 7.2 Hz, 2H), 7.56 (t,  $J$  = 7.8 Hz, 4H), 7.51 (d,  $J$  = 8.4 Hz, 2H), 7.37 (d,  $J$  = 8.4 Hz, 4H), 7.29 (t,  $J$  = 7.8 Hz, 2H), 7.24 (t,  $J$  = 7.2 Hz, 1H), 5.67 (t,  $J$  = 7.8 Hz, 1H), 3.87 – 3.77 (m, 1H), 3.77 – 3.68 (m, 1H), 2.86 – 2.66 (m, 2H), 2.02 – 1.83 (m, 2H), 0.82 – 0.74 (m, 1H), 0.33 (d,  $J$  = 7.8 Hz, 2H), -0.14 – -0.23 (m, 2H). **<sup>13</sup>C NMR** (150 MHz, CDCl<sub>3</sub>)  $\delta$  = 176.3, 173.0, 139.7, 139.6, 138.1, 134.8, 133.9, 130.3, 129.3, 129.2, 128.4, 128.3, 128.2, 128.0, 57.7, 47.1, 45.0, 32.4, 7.6, 4.3, 4.2. **HRMS** (ESI-TOF) ( $m/z$ ): Calcd for C<sub>33</sub>H<sub>31</sub>ClN<sub>2</sub>O<sub>6</sub>S<sub>2</sub> ([M + Na]<sup>+</sup>), 673.1204, found 673.1200.

**4-chloro-*N*-(4-methoxybenzoyl)-*N*-(1-phenyl-3-(*N*-(phenylsulfonyl)phenylsulfonamido)propyl)benzamide (7e)**

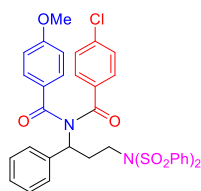

This compound was obtained in 99% (139 mg) yield as white solid by the general procedure. mp. 155 – 156 °C. **<sup>1</sup>H NMR** (600 MHz, CDCl<sub>3</sub>)  $\delta$  = 8.05 (d,  $J$  = 7.8 Hz, 4H), 7.64 (t,  $J$  = 7.8 Hz, 2H), 7.57 – 7.50 (m, 6H), 7.34 – 7.28 (m, 4H), 7.28 – 7.23 (m, 3H), 7.07 (d,  $J$  = 8.4 Hz, 2H), 6.60 (d,  $J$  = 9.0 Hz, 2H), 5.84 (dd,  $J$  = 9.0, 6.0 Hz, 1H), 4.01 – 3.92 (m, 1H), 3.84 – 3.76 (m, 1H), 3.71 (s, 3H), 3.09 – 2.99 (m, 1H), 2.86 – 2.75 (m, 1H). **<sup>13</sup>C NMR** (150 MHz, CDCl<sub>3</sub>)  $\delta$  = 173.3, 172.5, 162.8, 139.7, 138.2, 137.9, 135.8, 133.9, 131.1, 129.7, 129.5, 129.1, 128.5, 128.5, 128.4, 128.2, 128.1, 113.7, 58.5, 55.4, 47.3, 32.5. **HRMS** (ESI-TOF) ( $m/z$ ): Calcd for C<sub>36</sub>H<sub>31</sub>ClN<sub>2</sub>O<sub>7</sub>S<sub>2</sub> ([M + Na]<sup>+</sup>), 725.1193, found 725.1190.

**4-chloro-*N*-(4-methylbenzoyl)-*N*-(1-phenyl-3-(*N*-(phenylsulfonyl)phenylsulfonamido)propyl)benzamide (7f)**

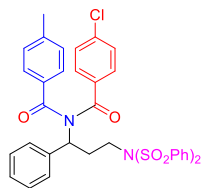

This compound was obtained in 83% (114 mg) yield as white solid by the general procedure. mp. 70 – 71 °C. **<sup>1</sup>H NMR** (600 MHz, CDCl<sub>3</sub>)  $\delta$  = 8.05 (d,  $J$  = 7.8 Hz, 4H), 7.64 (t,  $J$  = 7.2 Hz, 2H), 7.57 – 7.48 (m, 6H), 7.32 (t,  $J$  = 7.8 Hz, 2H), 7.26 – 7.18 (m, 5H), 7.05 (d,  $J$  = 8.4 Hz, 2H), 6.91 (d,  $J$  = 7.8 Hz, 2H), 5.85 (dd,  $J$  = 9.0, 6.0 Hz, 1H), 4.03 – 3.87 (m, 1H), 3.88 – 3.71 (m, 1H), 3.09 – 2.94 (m, 1H), 2.86 – 2.75 (m, 1H), 2.21 (s, 3H). **<sup>13</sup>C NMR** (150 MHz, CDCl<sub>3</sub>)  $\delta$  = 173.8, 172.8, 143.1, 139.8, 138.1, 138.0, 135.8, 134.4, 133.9, 129.9, 129.1, 129.1, 128.9, 128.5, 128.4, 128.4, 128.3, 128.1, 58.5, 47.3, 32.5, 21.5. **HRMS** (ESI-TOF) ( $m/z$ ): Calcd for C<sub>36</sub>H<sub>31</sub>ClN<sub>2</sub>O<sub>6</sub>S<sub>2</sub> ([M + Na]<sup>+</sup>), 709.1204, found 709.1212.

***N*-(4-chlorobenzoyl)-3-methyl-*N*-(1-phenyl-3-(*N*-(phenylsulfonyl)phenylsulfonamido)propyl)benzamide (7g)**

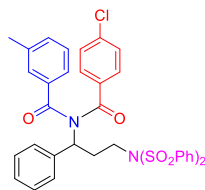

This compound was obtained in 83% (114 mg) yield as white solid by the general procedure. mp. 65 – 66 °C. **<sup>1</sup>H NMR** (600 MHz, CDCl<sub>3</sub>)  $\delta$  = 8.05 (dd,  $J$  = 8.4, 1.2 Hz, 4H), 7.64 (t,  $J$  = 7.8 Hz, 2H), 7.57 – 7.50 (m, 6H), 7.33 (t,  $J$  = 7.8 Hz, 2H), 7.28 – 7.23 (m, 1H), 7.21 – 7.16 (m, 2H), 7.11 – 7.06 (m, 2H), 7.06 – 7.01 (m, 3H), 6.99 (t,  $J$  = 7.8 Hz, 1H), 5.86 (dd,  $J$  = 9.0, 6.0 Hz, 1H), 4.03 – 3.92 (m, 1H), 3.88 – 3.74 (m, 1H), 3.10 – 2.96 (m, 1H), 2.89 – 2.76 (m, 1H), 2.17 (s, 3H). **<sup>13</sup>C NMR** (150 MHz, CDCl<sub>3</sub>)  $\delta$  = 173.9, 172.9, 139.8, 138.3, 138.1, 137.9, 137.1, 135.9, 133.9, 132.9, 129.8, 129.3, 129.1, 128.5, 128.4, 128.4, 128.2, 128.2, 125.8, 58.4, 47.3, 32.5, 21.0. **HRMS** (ESI-TOF) ( $m/z$ ): Calcd for C<sub>36</sub>H<sub>31</sub>ClN<sub>2</sub>O<sub>6</sub>S<sub>2</sub> ([M + Na]<sup>+</sup>), 709.1204, found 709.1211.

***N*-(4-chlorobenzoyl)-2-methyl-*N*-(1-phenyl-3-(*N*-(phenylsulfonyl)phenylsulfonamido)propyl)benzamide (7h)**

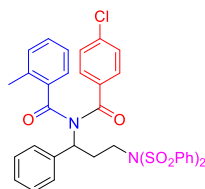

This compound was obtained in 65% (89 mg) yield as white solid by the general procedure. mp. 96 – 97 °C. **<sup>1</sup>H NMR** (600 MHz, CDCl<sub>3</sub>)  $\delta$  = 8.06 (d,  $J$  = 7.8 Hz, 4H), 7.64 (t,  $J$  = 7.2 Hz, 2H), 7.59 – 7.51 (m, 6H), 7.35 (t,  $J$  = 7.8 Hz, 2H), 7.28 (t,  $J$  = 7.2 Hz, 1H), 7.12 (d,  $J$  = 8.4 Hz, 2H), 7.07 – 7.02 (m, 3H), 6.97 (d,  $J$  = 7.2 Hz, 1H), 6.93 (t,  $J$  = 7.8 Hz, 1H), 6.83 (d,  $J$  = 7.8 Hz, 1H), 5.86 (t,  $J$  = 7.8 Hz, 1H), 4.02 – 3.90 (m, 1H), 3.86 – 3.73 (m, 1H), 3.10 – 2.94 (m, 1H), 2.93 – 2.83 (m, 1H), 2.19 (s, 3H). **<sup>13</sup>C NMR** (150 MHz, CDCl<sub>3</sub>)  $\delta$  = 173.5, 172.7, 139.7, 137.8, 137.7, 136.5, 136.5, 133.9, 131.2, 131.1, 129.1, 128.9, 128.7, 128.5, 128.3, 128.2, 127.7, 125.4, 57.9, 47.3, 19.7. **HRMS** (ESI-TOF) ( $m/z$ ): Calcd for C<sub>36</sub>H<sub>31</sub>ClN<sub>2</sub>O<sub>6</sub>S<sub>2</sub> ([M + Na]<sup>+</sup>), 709.1204, found 709.1196.

***N*-benzoyl-4-chloro-*N*-(1-phenyl-3-(*N*-(phenylsulfonyl)phenylsulfonamido)propyl)benzamide (7i)**

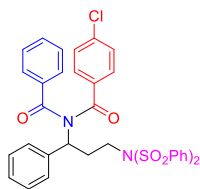

This compound was obtained in 86% (116 mg) yield as white solid by the general procedure. mp. 61 – 62 °C. **<sup>1</sup>H NMR** (600 MHz, CDCl<sub>3</sub>)  $\delta$  = 8.05 (d,  $J$  = 7.2 Hz, 4H), 7.63 (t,  $J$  = 7.8 Hz, 2H), 7.57 – 7.50 (m, 6H), 7.33 (t,  $J$  = 7.8 Hz, 2H), 7.30 – 7.19 (m, 6H), 7.10 (t,  $J$  = 7.8 Hz, 2H), 7.03 (d,  $J$  = 8.4 Hz, 2H), 5.88 (dd,  $J$  = 9.0, 6.0 Hz, 1H), 4.05 – 3.90 (m, 1H), 3.86 – 3.75 (m, 1H), 3.10 – 2.97 (m, 1H), 2.91 – 2.78 (m, 1H). **<sup>13</sup>C NMR** (150 MHz, CDCl<sub>3</sub>)  $\delta$  = 173.7, 172.9, 139.7, 138.1, 138.0, 137.1, 135.7,

133.9, 132.1, 129.9, 129.1, 128.6, 128.5, 128.4, 128.4, 128.3, 128.2, 128.2, 58.5, 47.2, 32.4. **HRMS** (ESI-TOF) (m/z): Calcd for C<sub>35</sub>H<sub>29</sub>ClN<sub>2</sub>O<sub>6</sub>S<sub>2</sub> ([M + Na]<sup>+</sup>), 695.1048, found 695.1057.

**4-chloro-*N*-(4-chlorobenzoyl)-*N*-(1-phenyl-3-(*N*-(phenylsulfonyl)phenylsulfonamido)propyl)benzamide (7j)**

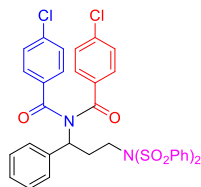

This compound was obtained in 75% (106 mg) yield as white solid by the general procedure. mp. 60 – 61 °C. **<sup>1</sup>H NMR** (600 MHz, CDCl<sub>3</sub>)  $\delta$  = 8.05 (d, *J* = 7.8 Hz, 4H), 7.64 (t, *J* = 7.2 Hz, 2H), 7.56 – 7.50 (m, 6H), 7.33 (t, *J* = 7.8 Hz, 2H), 7.28 – 7.25 (m, 1H), 7.23 (d, *J* = 8.4 Hz, 4H), 7.09 (d, *J* = 8.4 Hz, 4H), 5.84 (dd, *J* = 9.0, 6.0 Hz, 1H), 3.99 – 3.88 (m, 1H), 3.84 – 3.73 (m, 1H), 3.09 – 2.97 (m, 1H), 2.87 – 2.77 (m, 1H). **<sup>13</sup>C NMR** (150 MHz, CDCl<sub>3</sub>)  $\delta$  = 172.6, 139.7, 138.6, 137.8, 135.5, 133.9, 129.9, 129.1, 128.7, 128.6, 128.4, 128.3, 128.2, 58.7, 47.1, 32.5. **HRMS** (ESI-TOF) (m/z): Calcd for C<sub>35</sub>H<sub>28</sub>Cl<sub>2</sub>N<sub>2</sub>O<sub>6</sub>S<sub>2</sub> ([M + Na]<sup>+</sup>), 729.0658, found 729.0670.

**4-bromo-*N*-(4-chlorobenzoyl)-*N*-(1-phenyl-3-(*N*-(phenylsulfonyl)phenylsulfonamido)propyl)benzamide (7k)**

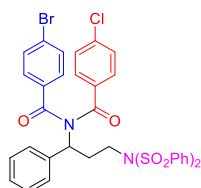

This compound was obtained in 74% (111 mg) yield as white solid by the general procedure. mp. 122 – 123 °C. **<sup>1</sup>H NMR** (600 MHz, CDCl<sub>3</sub>)  $\delta$  = 8.04 (d, *J* = 7.2 Hz, 4H), 7.63 (t, *J* = 7.8 Hz, 2H), 7.56 – 7.50 (m, 6H), 7.32 (t, *J* = 7.8 Hz, 2H), 7.27 – 7.21 (m, 5H), 7.15 (d, *J* = 8.4 Hz, 2H), 7.09 (d, *J* = 8.4 Hz, 2H), 5.84 (dd, *J* = 9.6, 6.0 Hz, 1H), 3.99 – 3.98 (m, 1H), 3.85 – 3.72 (m, 1H), 3.09 – 2.95 (m, 1H), 2.89 – 2.79 (m, 1H). **<sup>13</sup>C NMR** (150 MHz, CDCl<sub>3</sub>)  $\delta$  = 172.7, 172.6, 139.7, 138.6, 137.8, 135.9, 135.5, 133.9, 131.7, 130.0, 129.9, 129.2, 129.1, 128.7, 128.6, 128.4, 128.3, 128.2, 127.1, 58.7, 47.1, 32.5. **HRMS** (ESI-TOF) (m/z): Calcd for C<sub>35</sub>H<sub>28</sub>BrClN<sub>2</sub>O<sub>6</sub>S<sub>2</sub> ([M + Na]<sup>+</sup>), 773.0153, found 773.0158.

**4-chloro-*N*-cinnamoyl-*N*-(1-phenyl-3-(*N*-(phenylsulfonyl)phenylsulfonamido)propyl)benzamide (7l)**

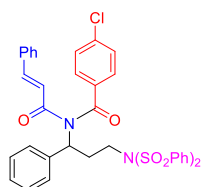

This compound was obtained in 92% (129 mg) yield as white solid by the general procedure. mp. 52 – 53 °C. **<sup>1</sup>H NMR** (600 MHz, CDCl<sub>3</sub>)  $\delta$  = 8.03 (d, *J* = 7.2 Hz, 4H), 7.63 (t, *J* = 7.2 Hz, 2H), 7.57 – 7.49 (m, 6H), 7.46 – 7.40 (m, 3H), 7.35 – 7.29 (m, 5H), 7.28 – 7.24 (m, 3H), 7.09 (d, *J* = 7.2 Hz, 2H), 6.04

(d,  $J = 15.0$  Hz, 1H), 5.83 (dd,  $J = 9.0, 6.0$  Hz, 1H), 3.93 – 3.71 (m, 2H), 2.97 – 2.85 (m, 1H), 2.84 – 2.70 (m, 1H).  **$^{13}\text{C}$  NMR** (150 MHz,  $\text{CDCl}_3$ )  $\delta = 172.1, 169.5, 143.9, 139.7, 139.3, 138.5, 135.2, 134.0, 133.9, 130.6, 130.3, 129.2, 129.1, 128.9, 128.5, 128.2, 128.1, 127.9, 122.4, 57.4, 47.1, 32.1$ . **HRMS** (ESI-TOF) ( $m/z$ ): Calcd for  $\text{C}_{37}\text{H}_{31}\text{ClN}_2\text{O}_6\text{S}_2$  ( $[\text{M} + \text{Na}]^+$ ), 721.1204, found 721.1208.

## VI. References

- 1 C. R. Pitts, Arther, B. Ling, J. A. Snyder, A. E. Bragg and T. Lectka, *J. Am. Chem. Soc.* **2016**, *138*, 6598.
- 2 Z. Yang, J. C. Lorenz and Y. Shi. *Tetrahedron Lett.* **1998**, *39*, 8621.

## VII. $^1\text{H}$ and $^{13}\text{C}$ NMR Spectra of new compounds

Compound **4a**

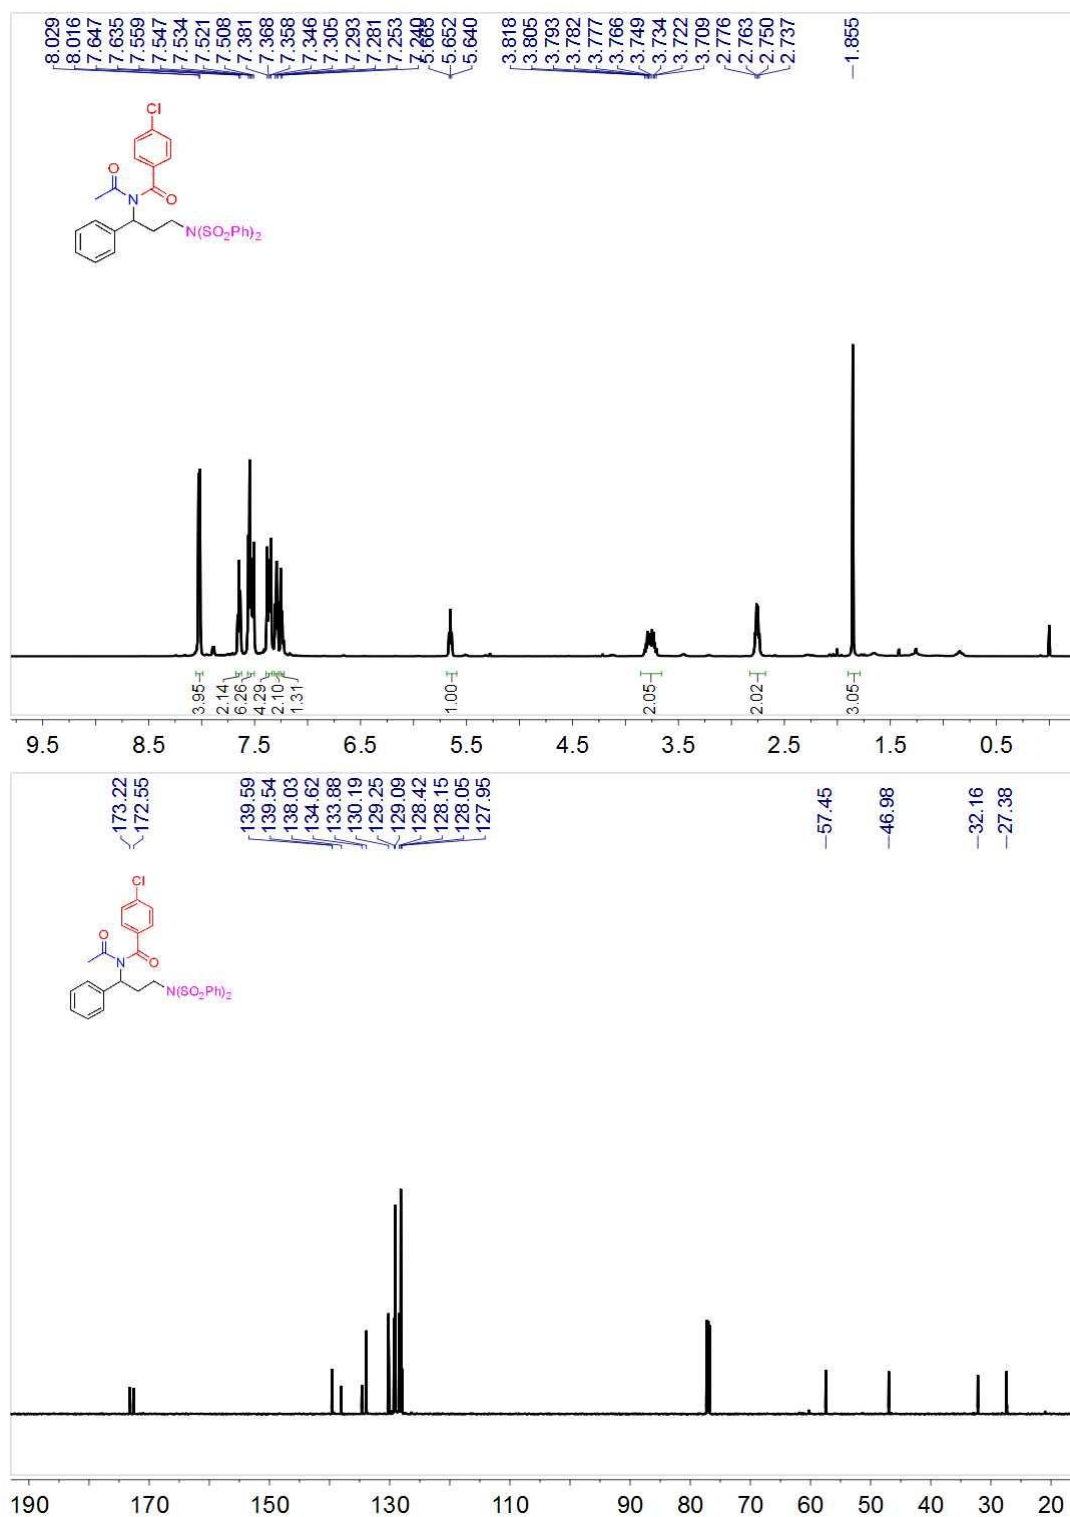

Compound **4b**

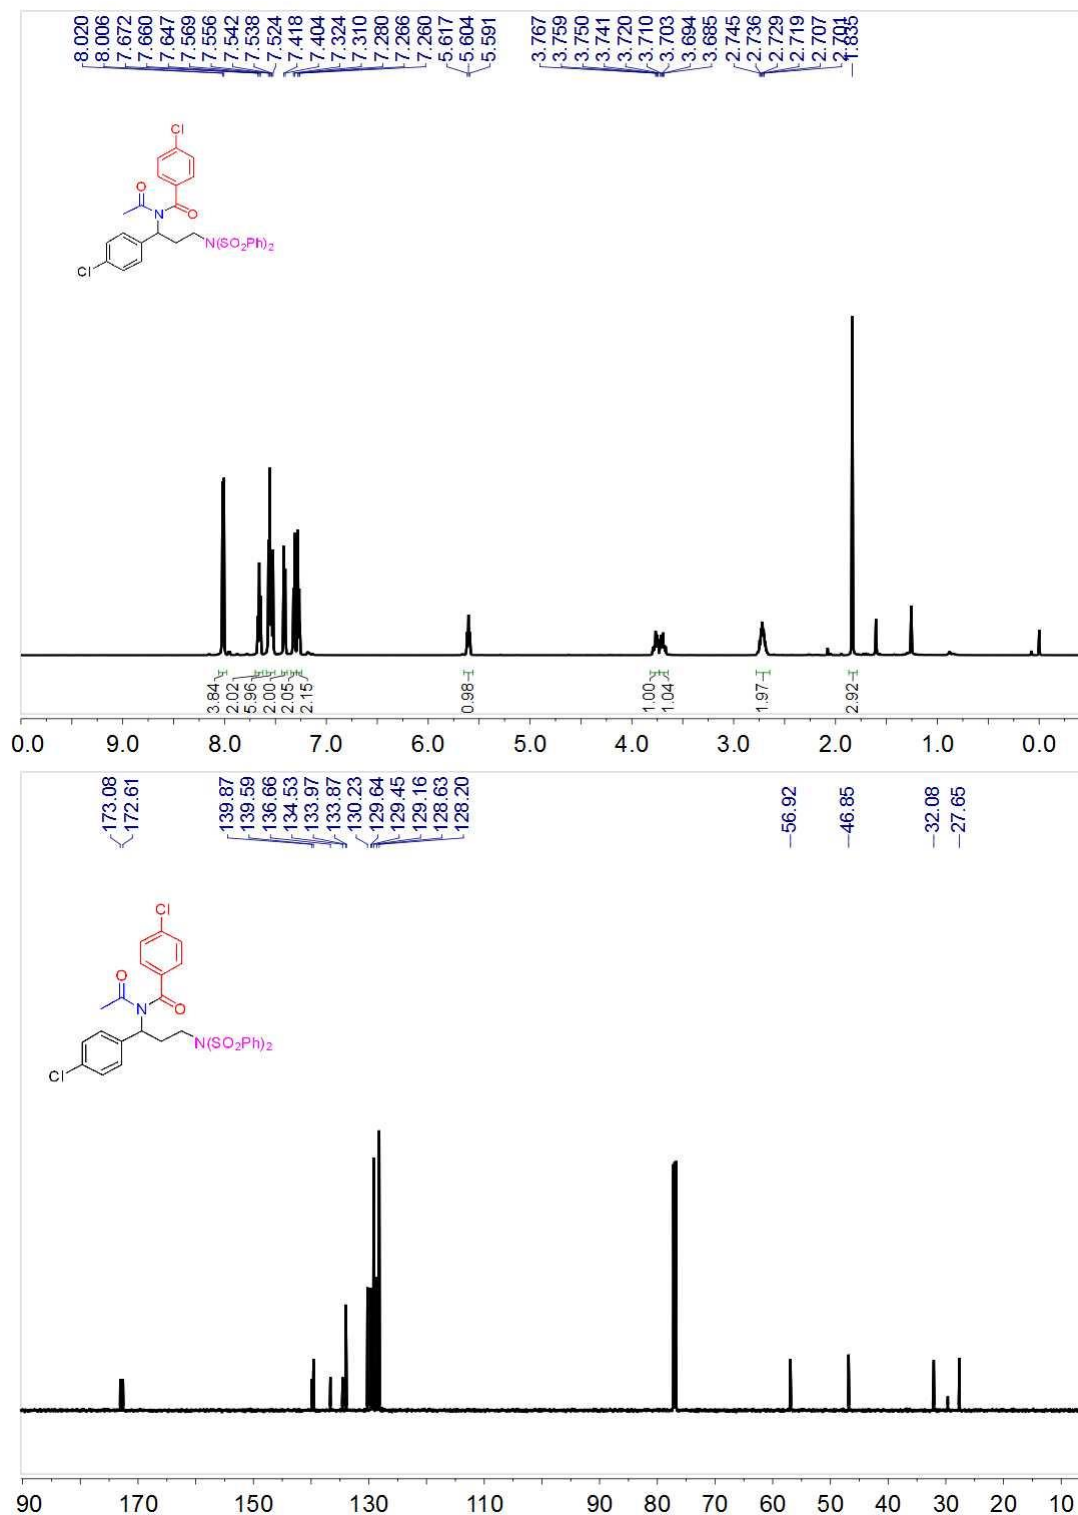



Compound **4c**

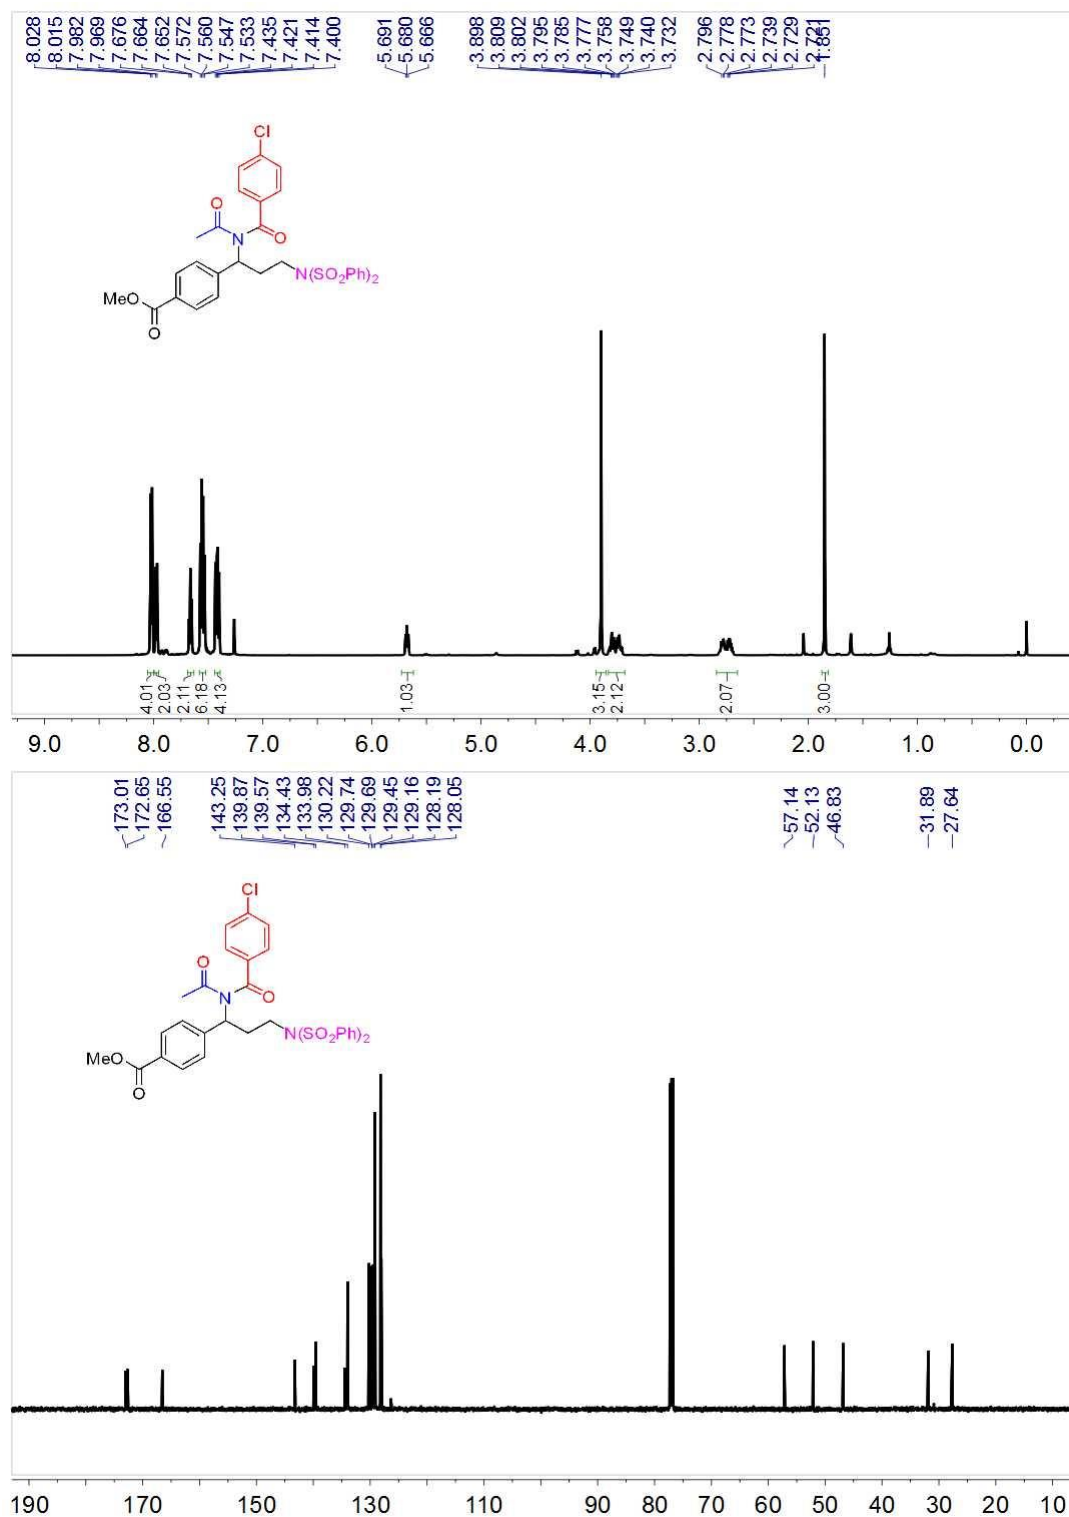

Compound **4d**

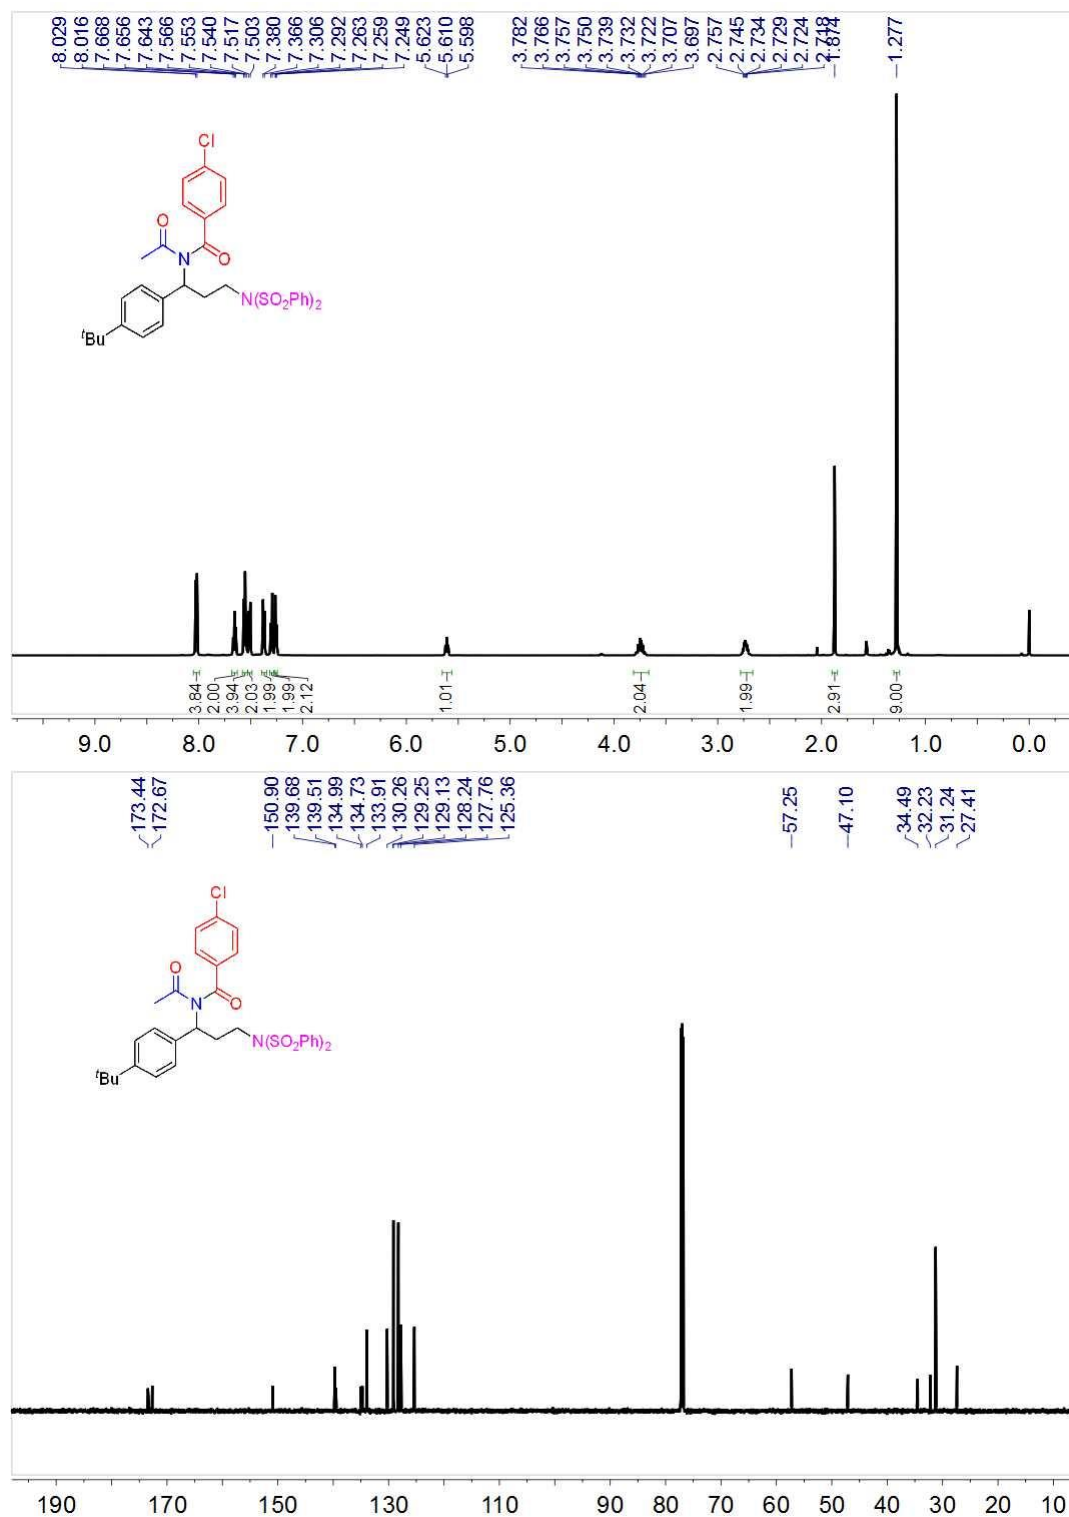

The figure displays the <sup>1</sup>H and <sup>13</sup>C NMR spectra of compound 10, which is 4-(4-chlorobenzoyl)-N-(4-methylphenyl)-2-(dimethylphenylsulfonio)ethanamide. The chemical structure is shown in the top left corner of each spectrum.

**<sup>1</sup>H NMR Spectrum (Top):** The spectrum shows peaks in the aromatic region (6.5–8.1 ppm) and aliphatic region (1.8–3.8 ppm). The chemical shifts (ppm) are listed above the peaks: 8.032, 8.019, 7.668, 7.655, 7.643, 7.567, 7.555, 7.542, 7.522, 7.509, 7.389, 7.375, 7.240, 7.227, 7.103, 7.090, 5.621, 5.608, 5.596, 3.794, 3.783, 3.769, 3.757, 3.741, 3.736, 3.723, 3.709, 3.697, 2.749, 2.736, 2.723, 2.710, 2.295, and 1.849. Integration values are shown below the peaks: 3.87, 2.06, 2.14, 2.07, 2.04, 2.00, 1.05, 2.14, 2.07, 3.10, and 3.03.

**<sup>13</sup>C NMR Spectrum (Bottom):** The spectrum shows peaks in the aromatic region (128–174 ppm) and aliphatic region (21–58 ppm). The chemical shifts (ppm) are listed above the peaks: 173.33, 172.64, 139.72, 139.57, 137.75, 135.01, 134.78, 133.90, 130.26, 129.31, 129.14, 128.24, 128.05, 57.36, 47.11, 32.29, 27.47, and 21.06.

Compound **4e'**

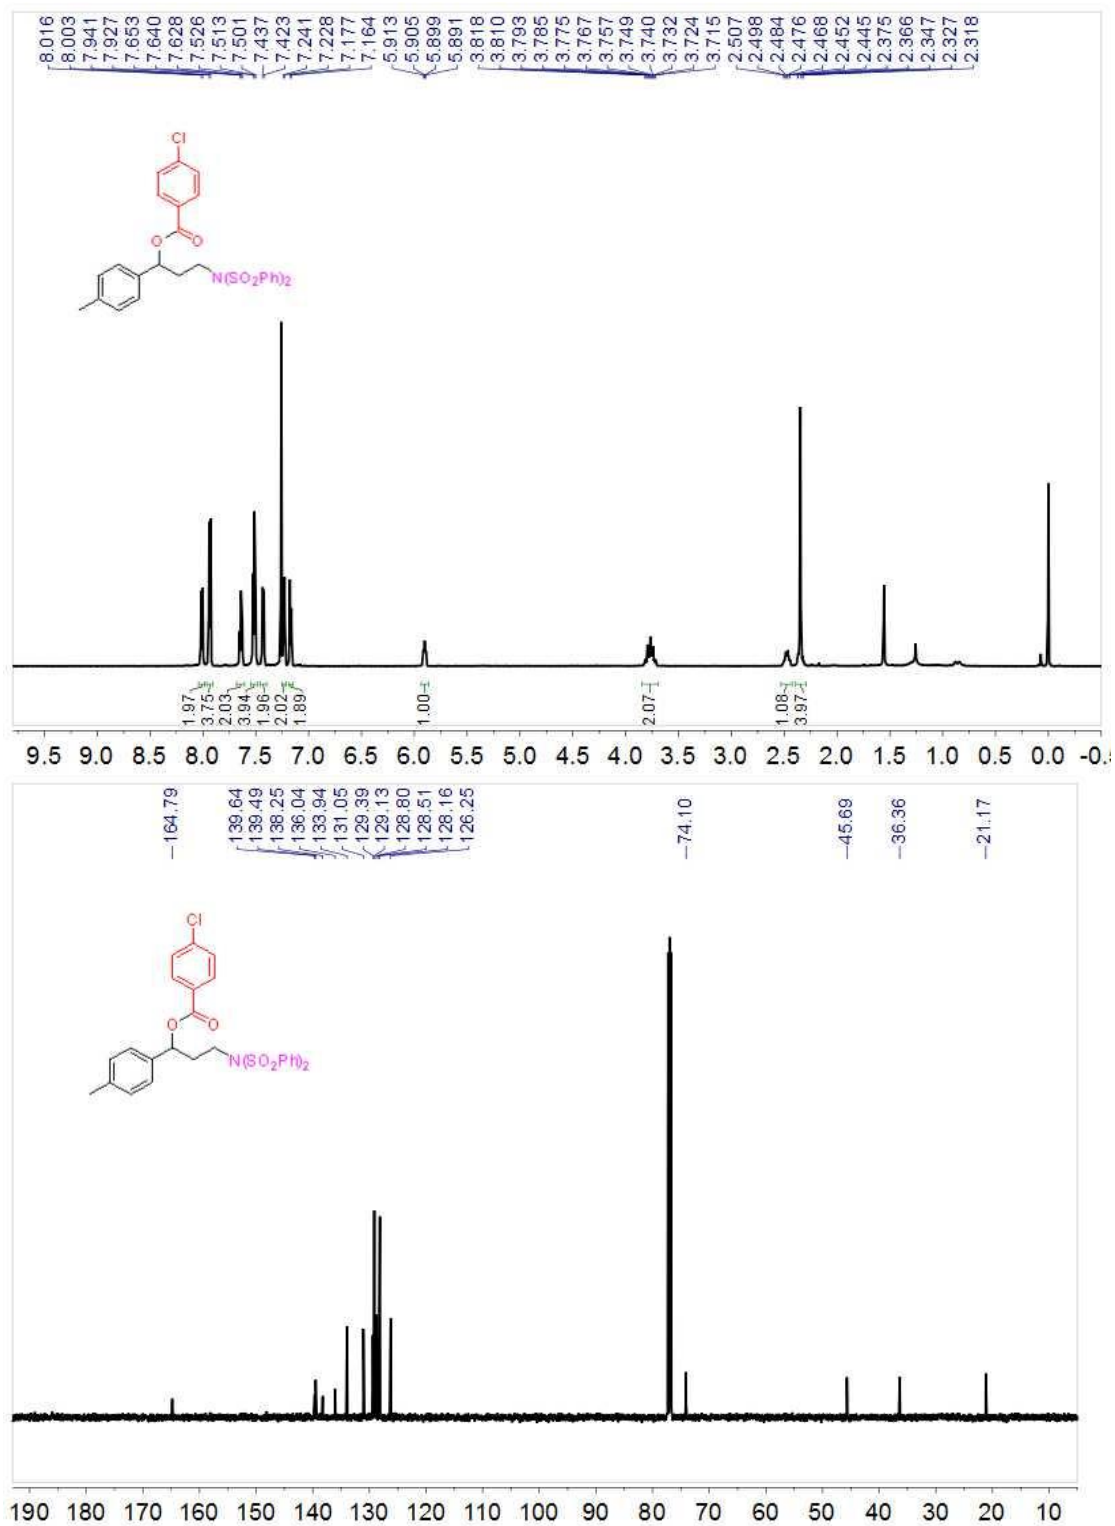

Compound **4f'**

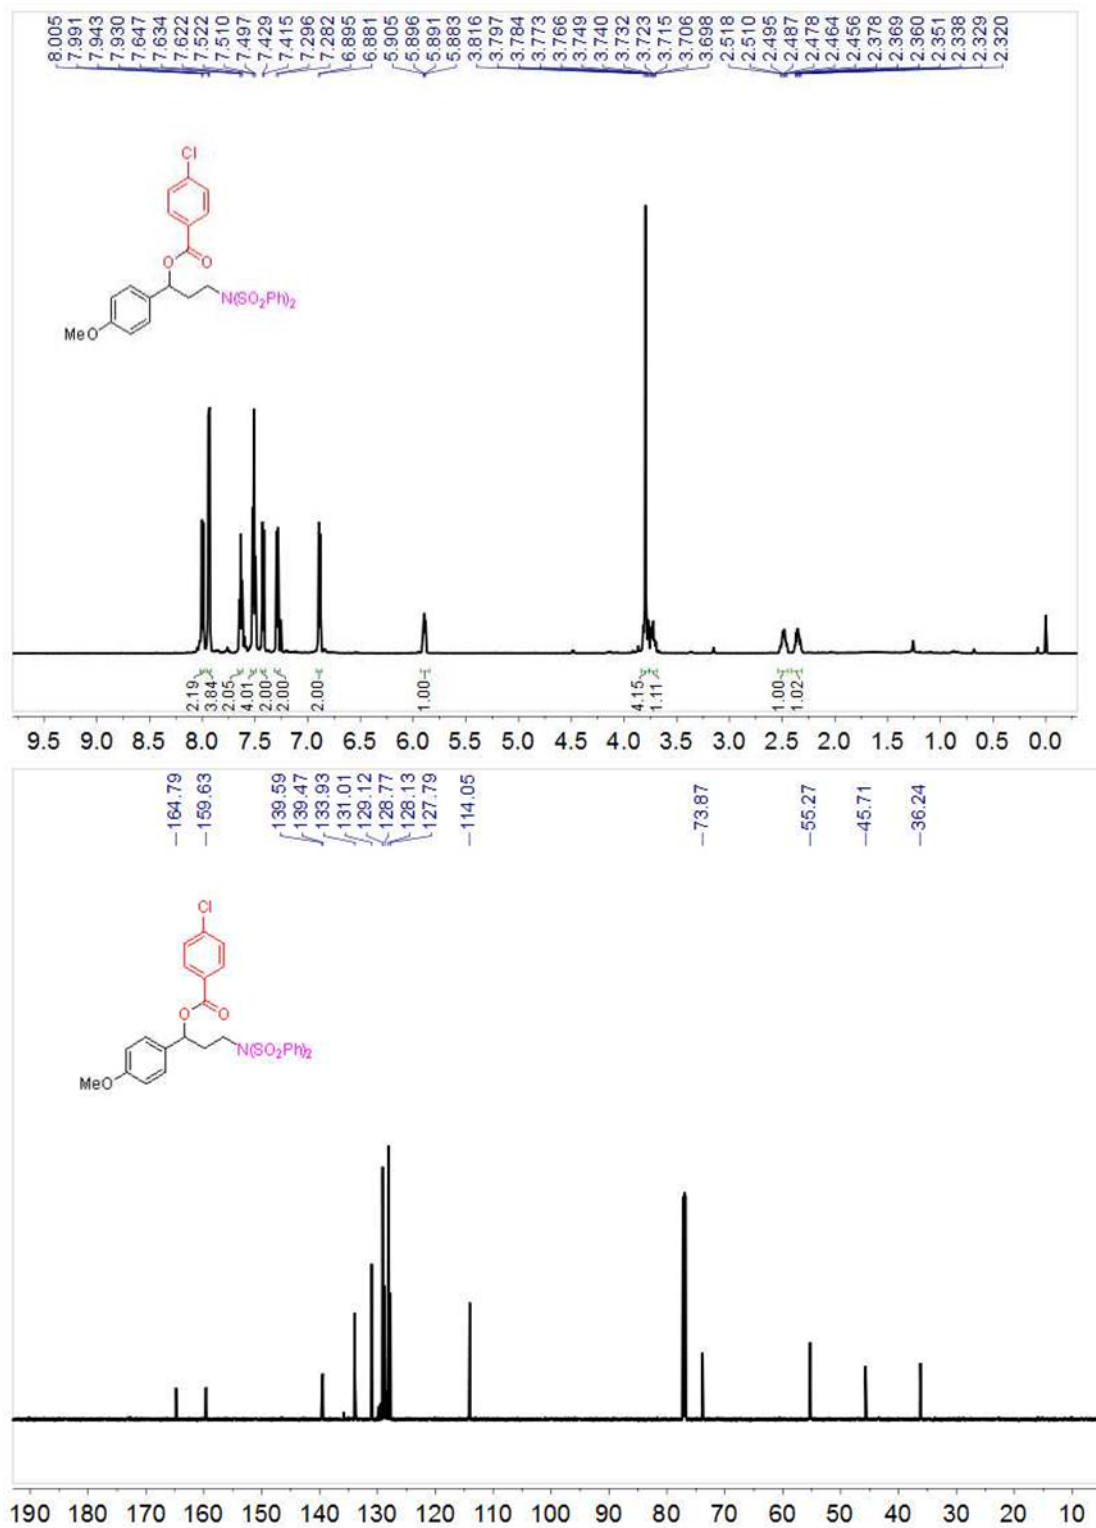

Compound **4g**

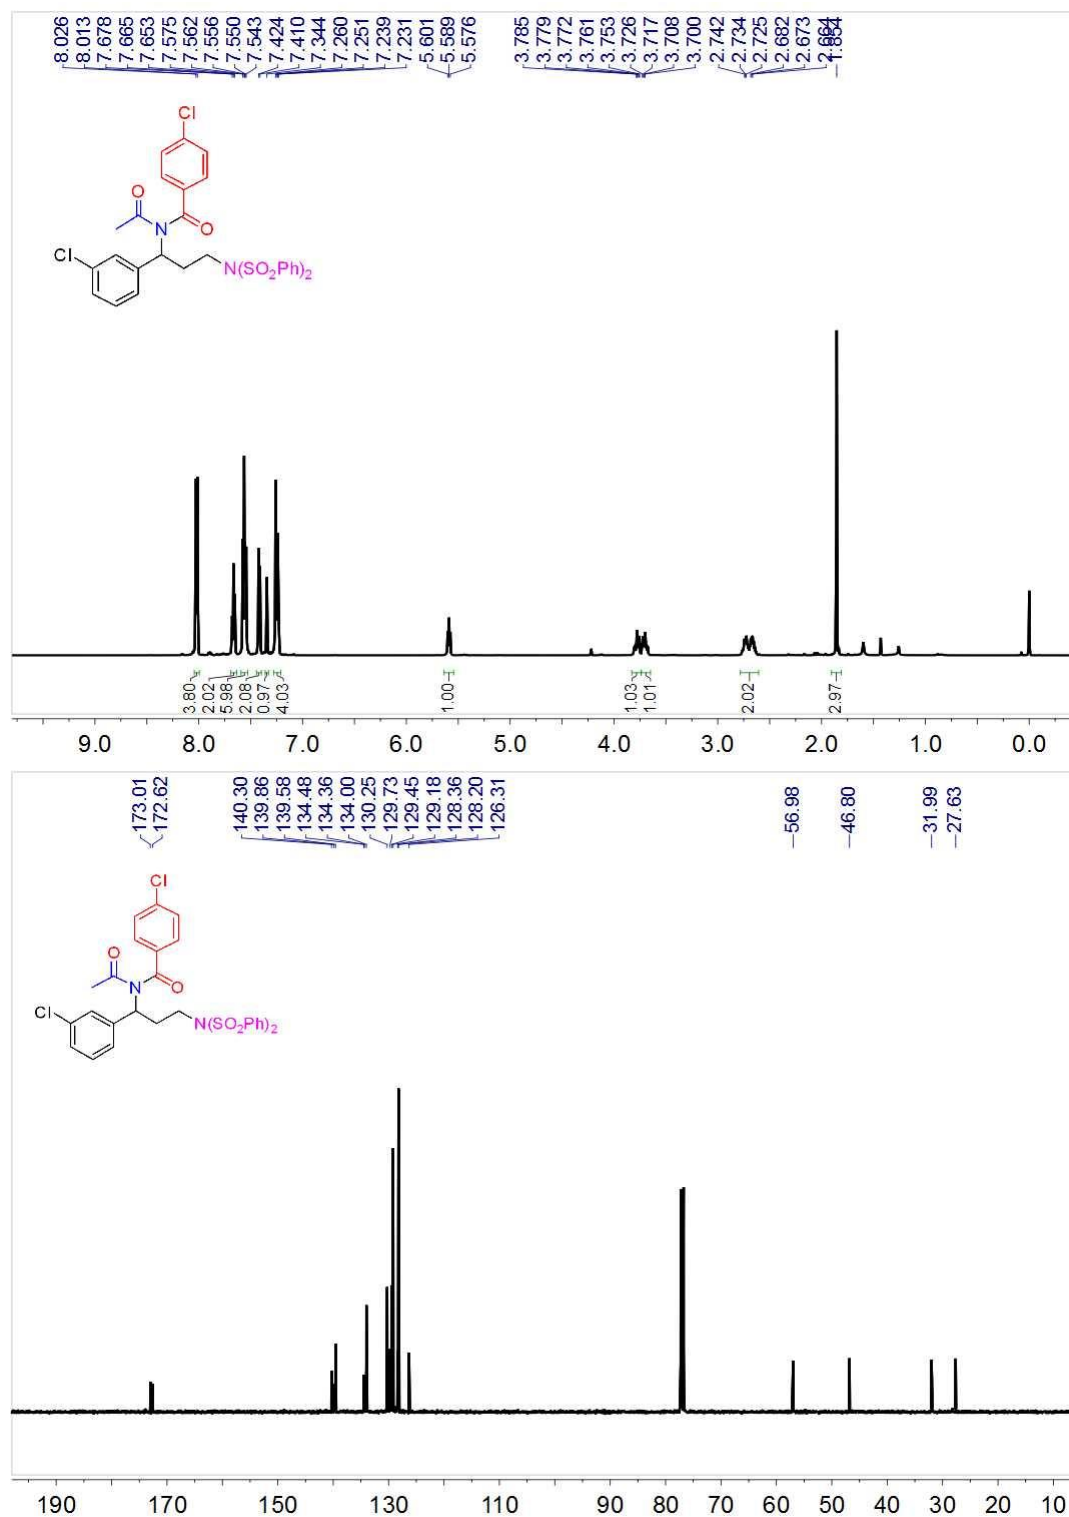

Compound **4h**

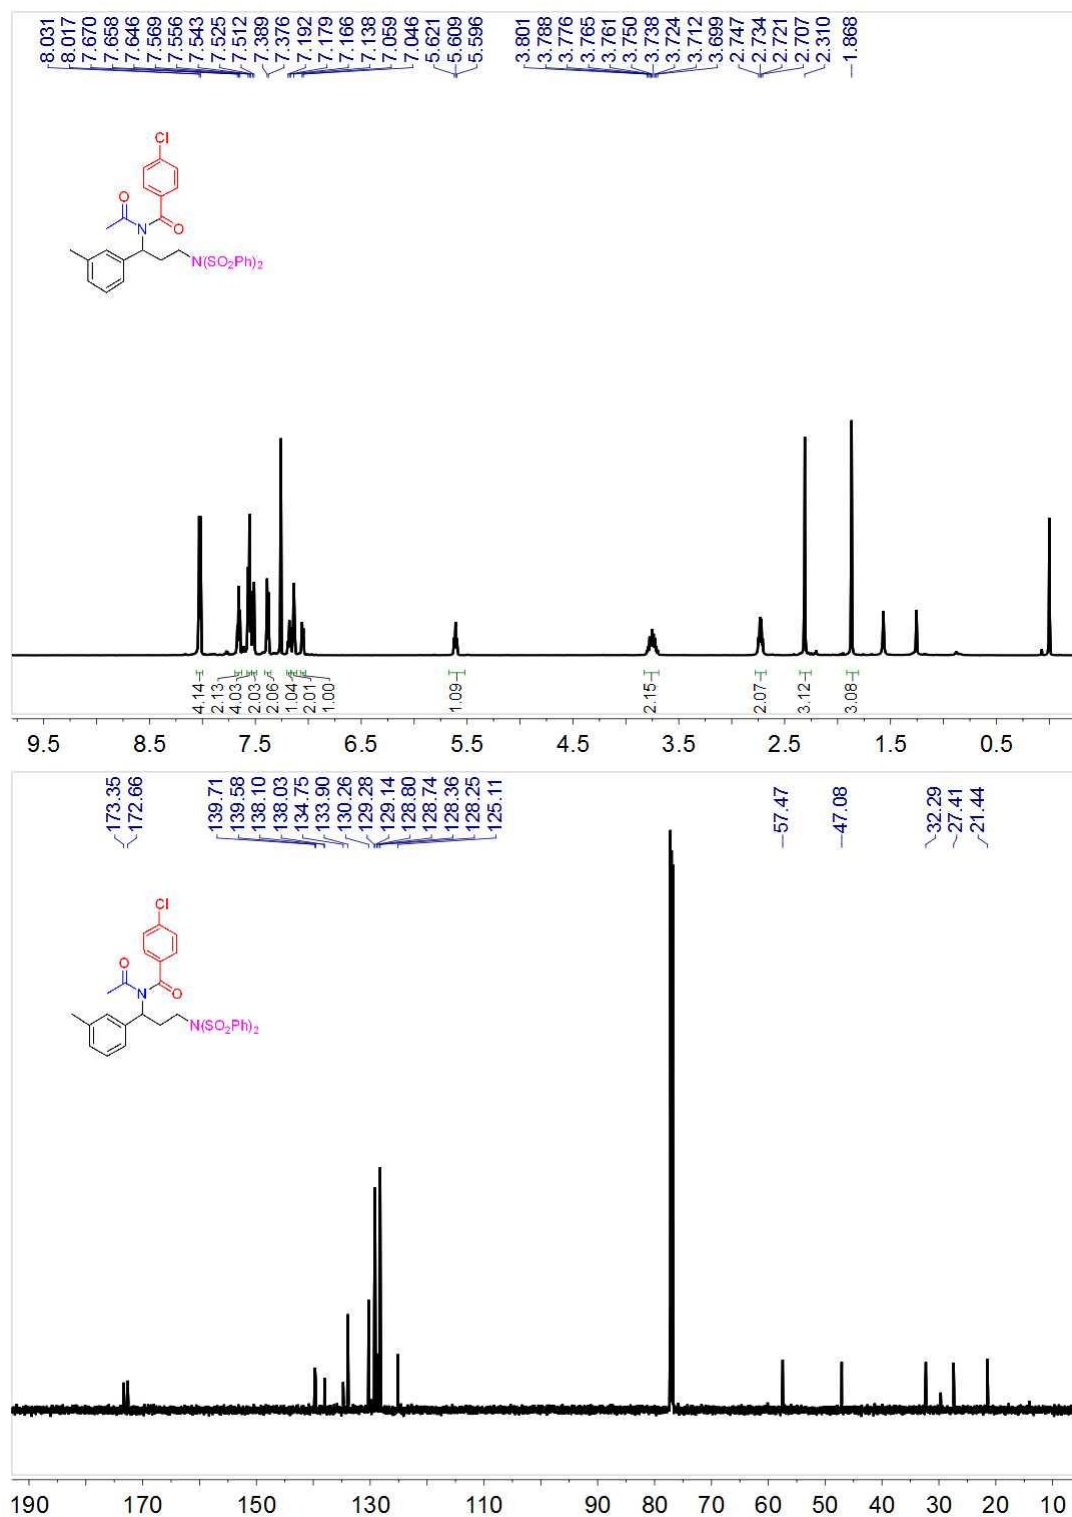

Compound **4i**

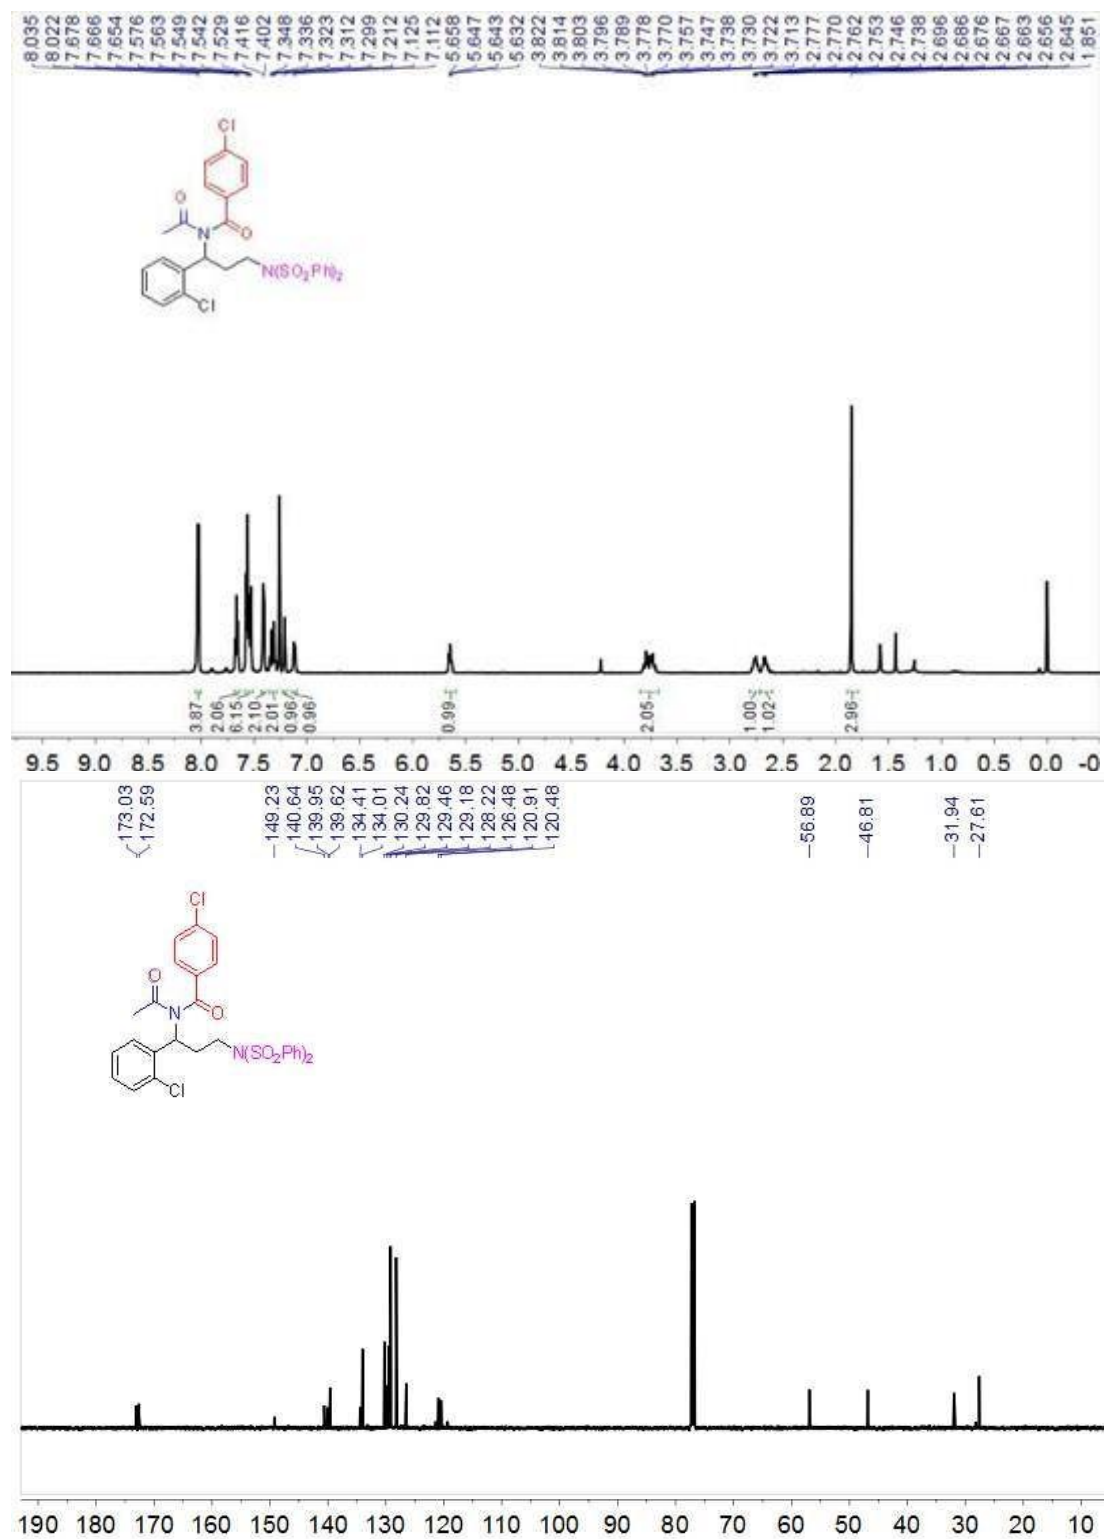



Compound **4j**

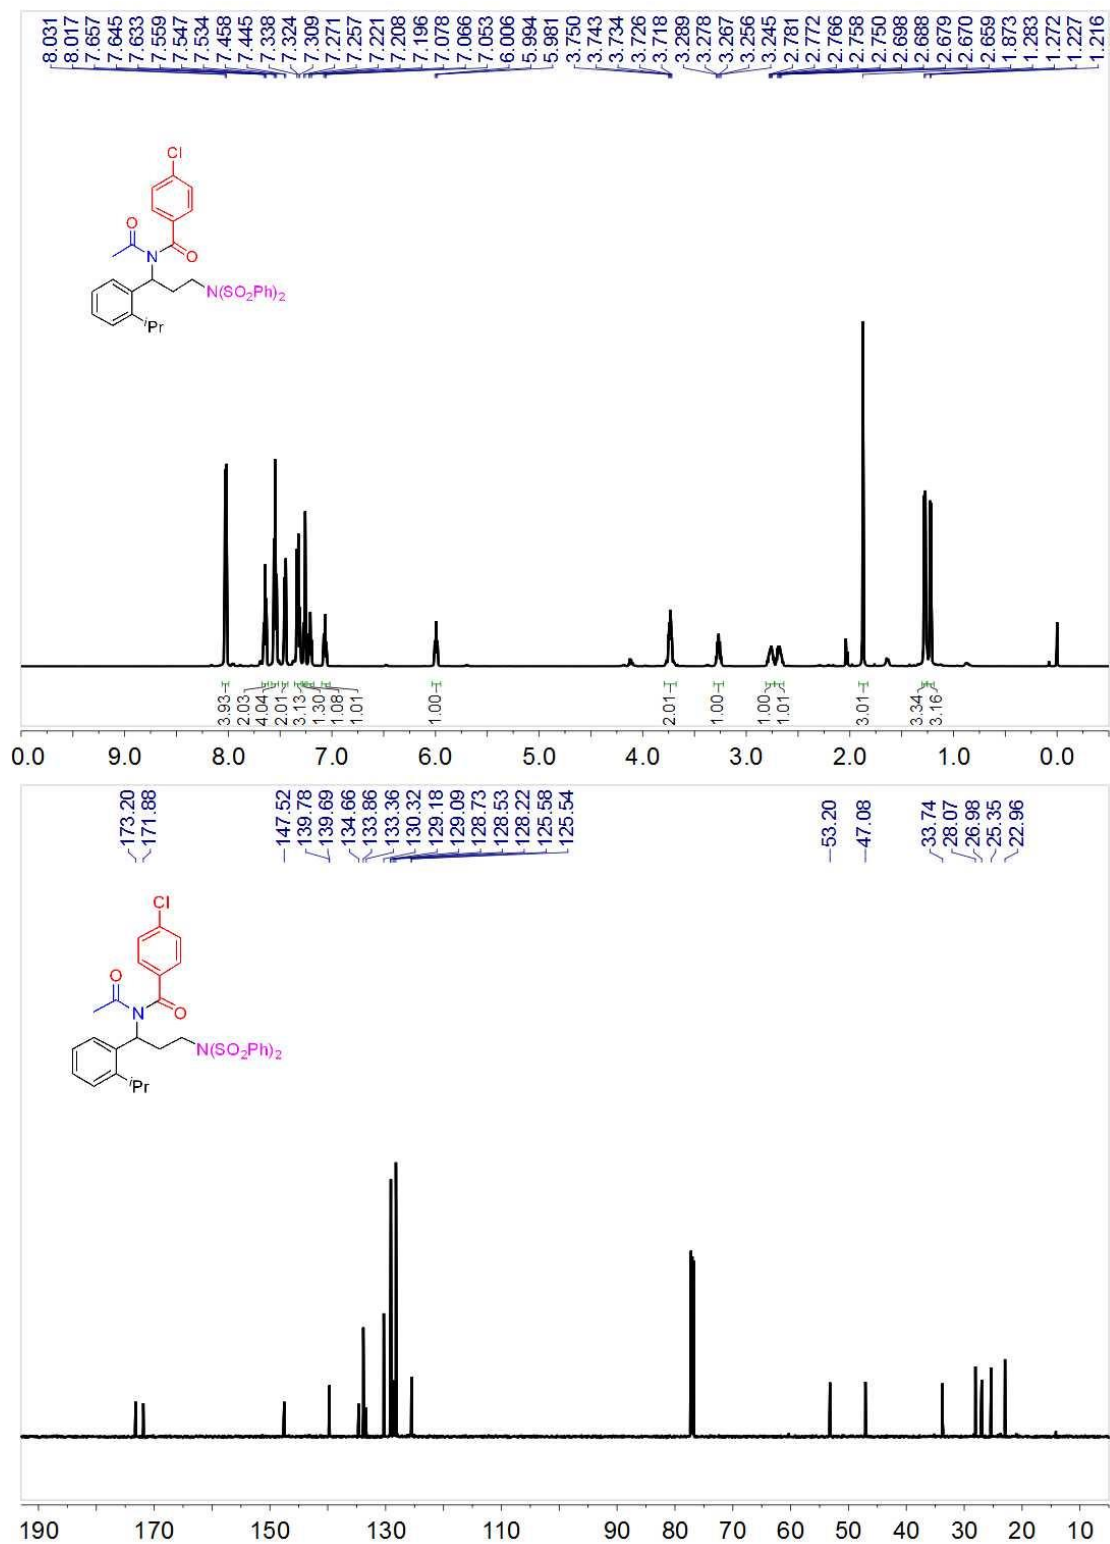

# Compound 4k

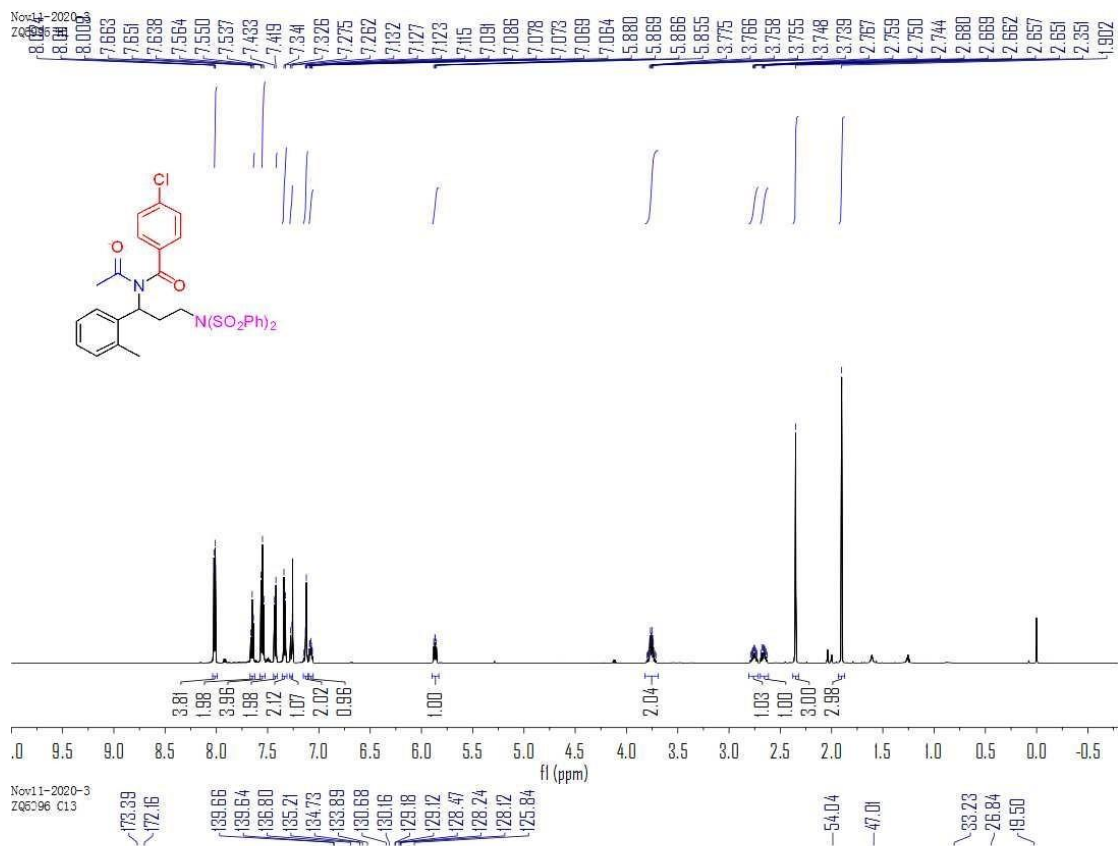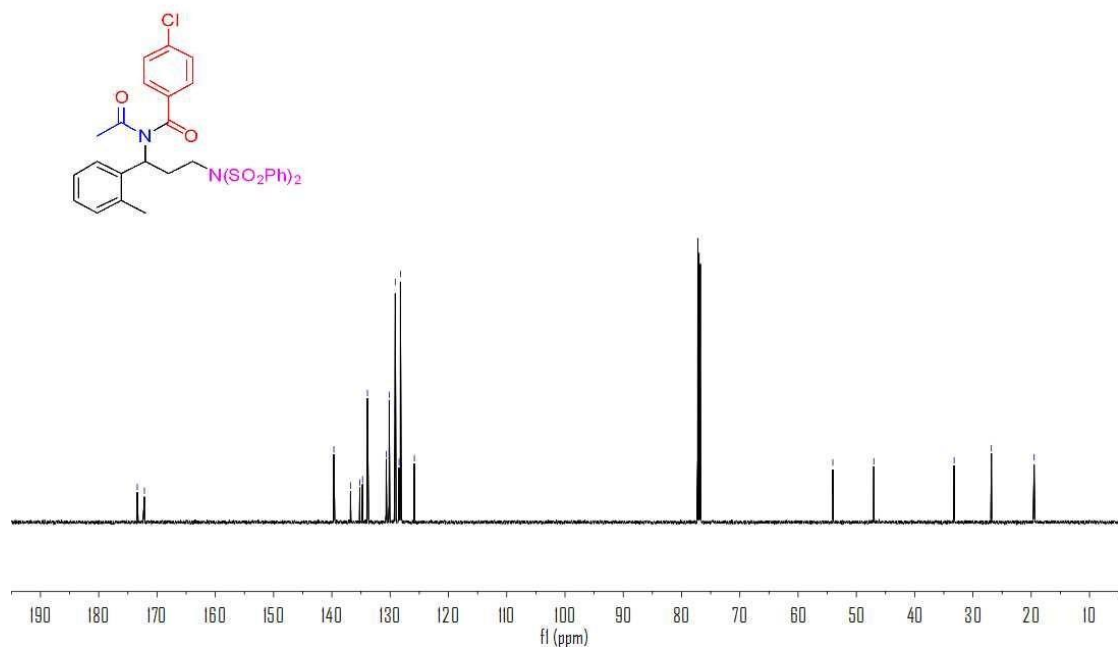

Compound 4l

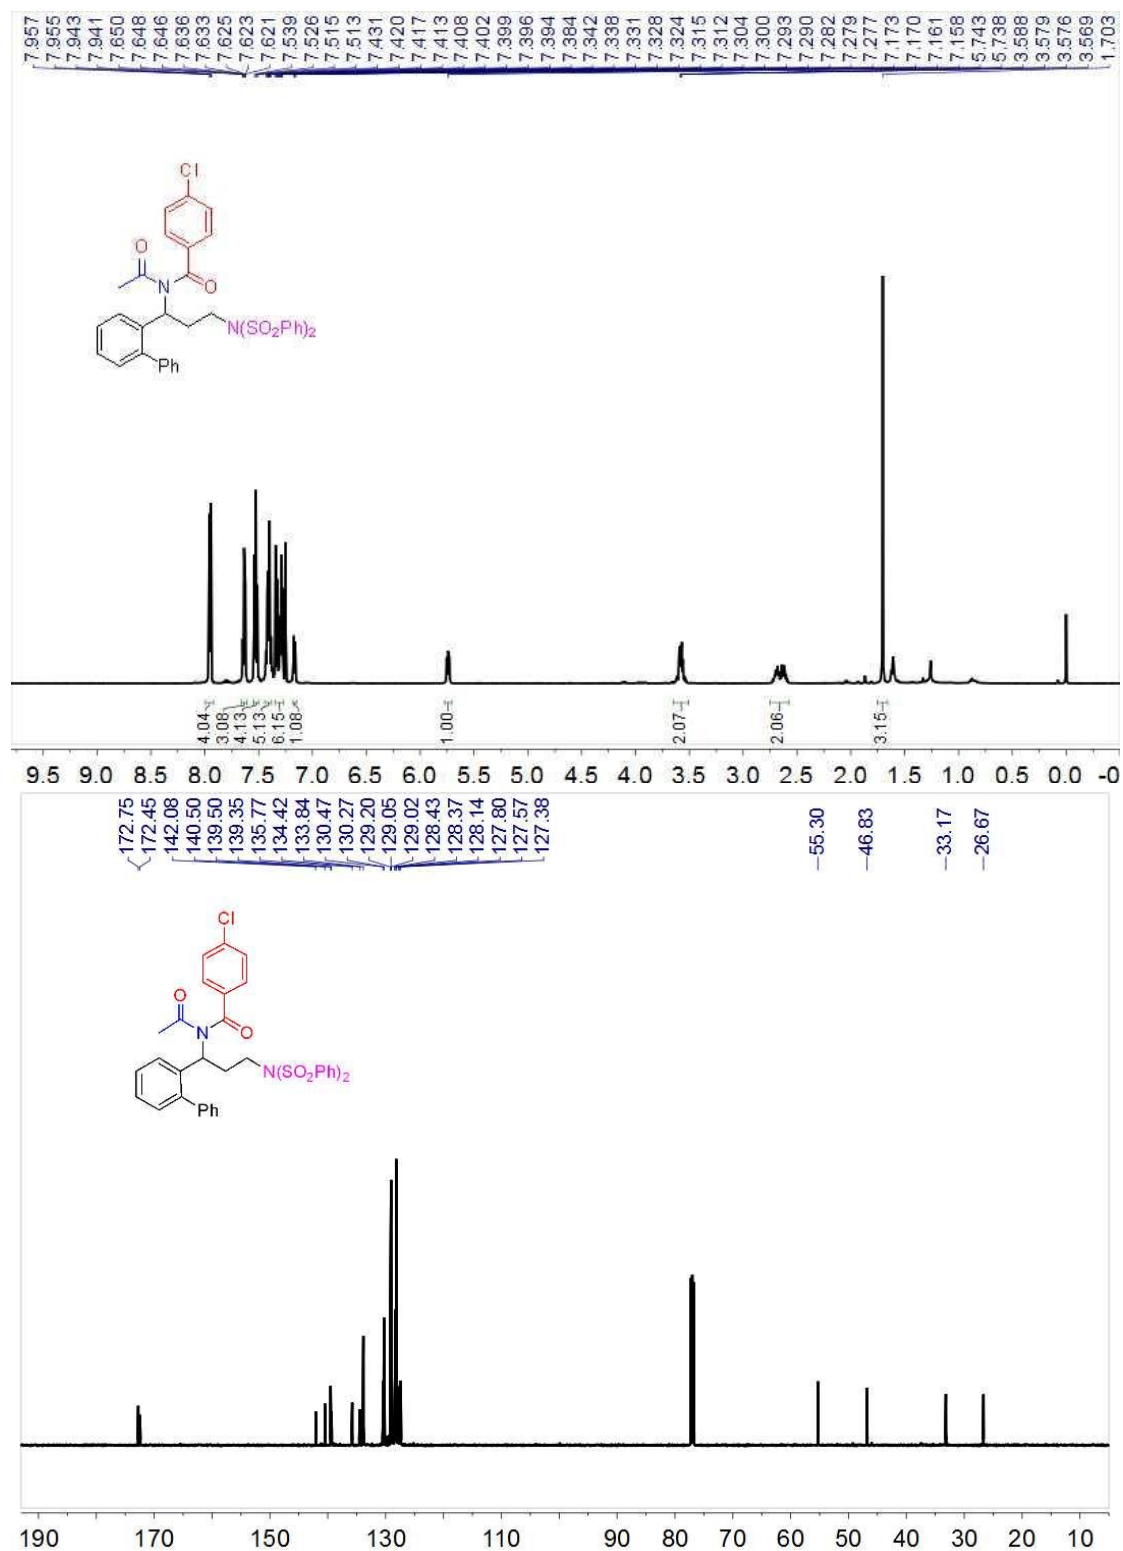

The figure displays the  $^1\text{H}$  and  $^{13}\text{C}$  NMR spectra of compound 10, along with its chemical structure.

**Chemical Structure:** The structure of compound 10 is shown, featuring a 2,6-dimethylphenyl ring substituted with a 4-chlorobenzoyl group and a  $\text{N}(\text{SO}_2\text{Ph})_2$  group.

**$^1\text{H}$  NMR Spectrum (Top):** The  $^1\text{H}$  NMR spectrum (400 MHz,  $\text{CDCl}_3$ ) shows peaks in the aromatic region (6.8–8.1 ppm) and aliphatic region (1.9–2.8 ppm). Integration values are provided below the peaks.

**$^{13}\text{C}$  NMR Spectrum (Bottom):** The  $^{13}\text{C}$  NMR spectrum (100 MHz,  $\text{CDCl}_3$ ) shows peaks in the aromatic region (126–139 ppm) and aliphatic region (19–53 ppm).

Compound **5a**

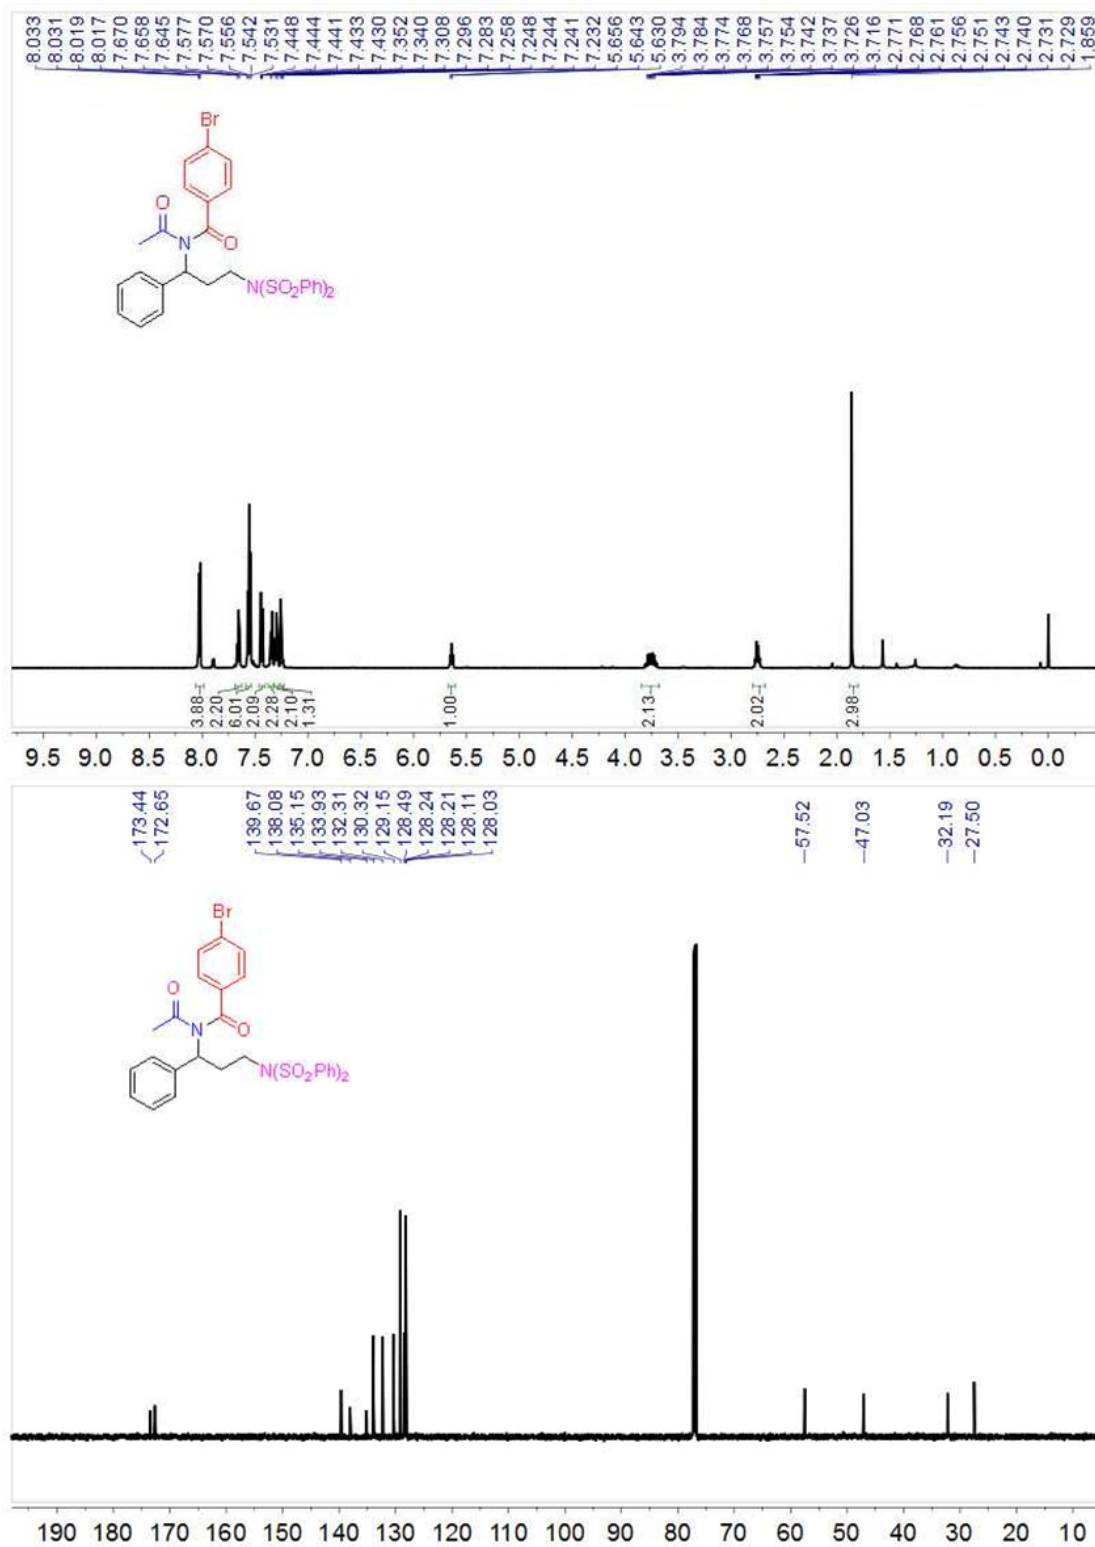

Compound **5b**

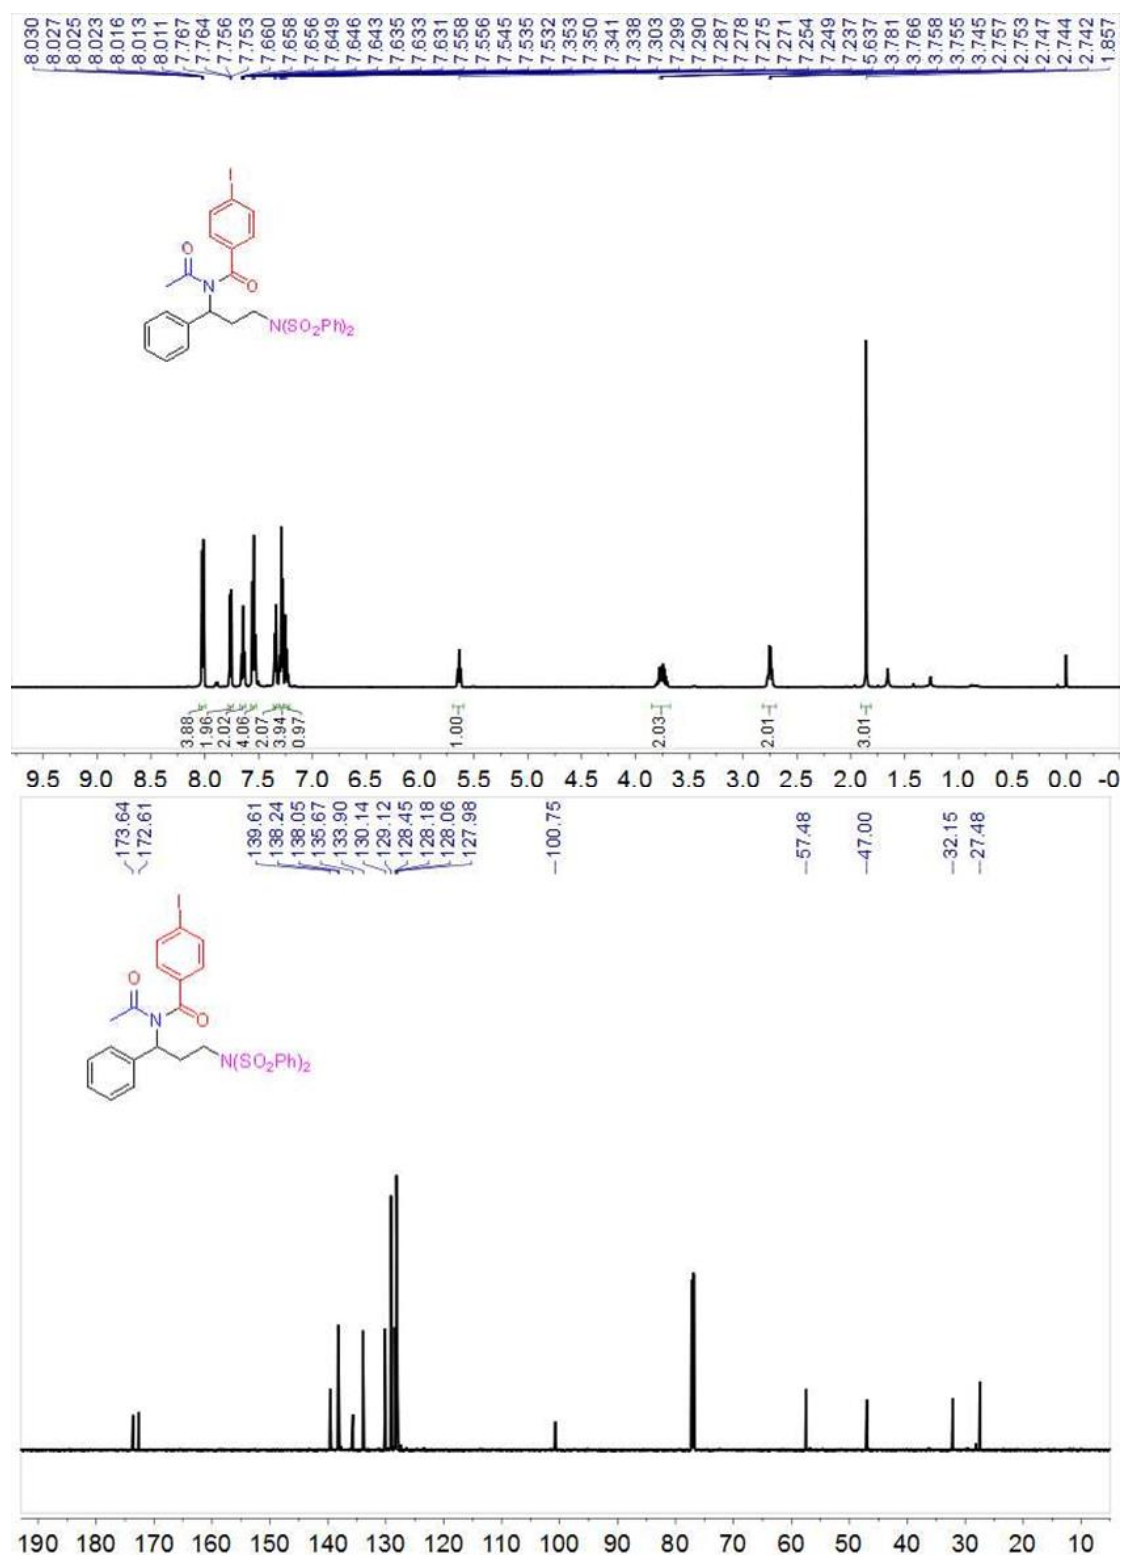

Compound **5c**

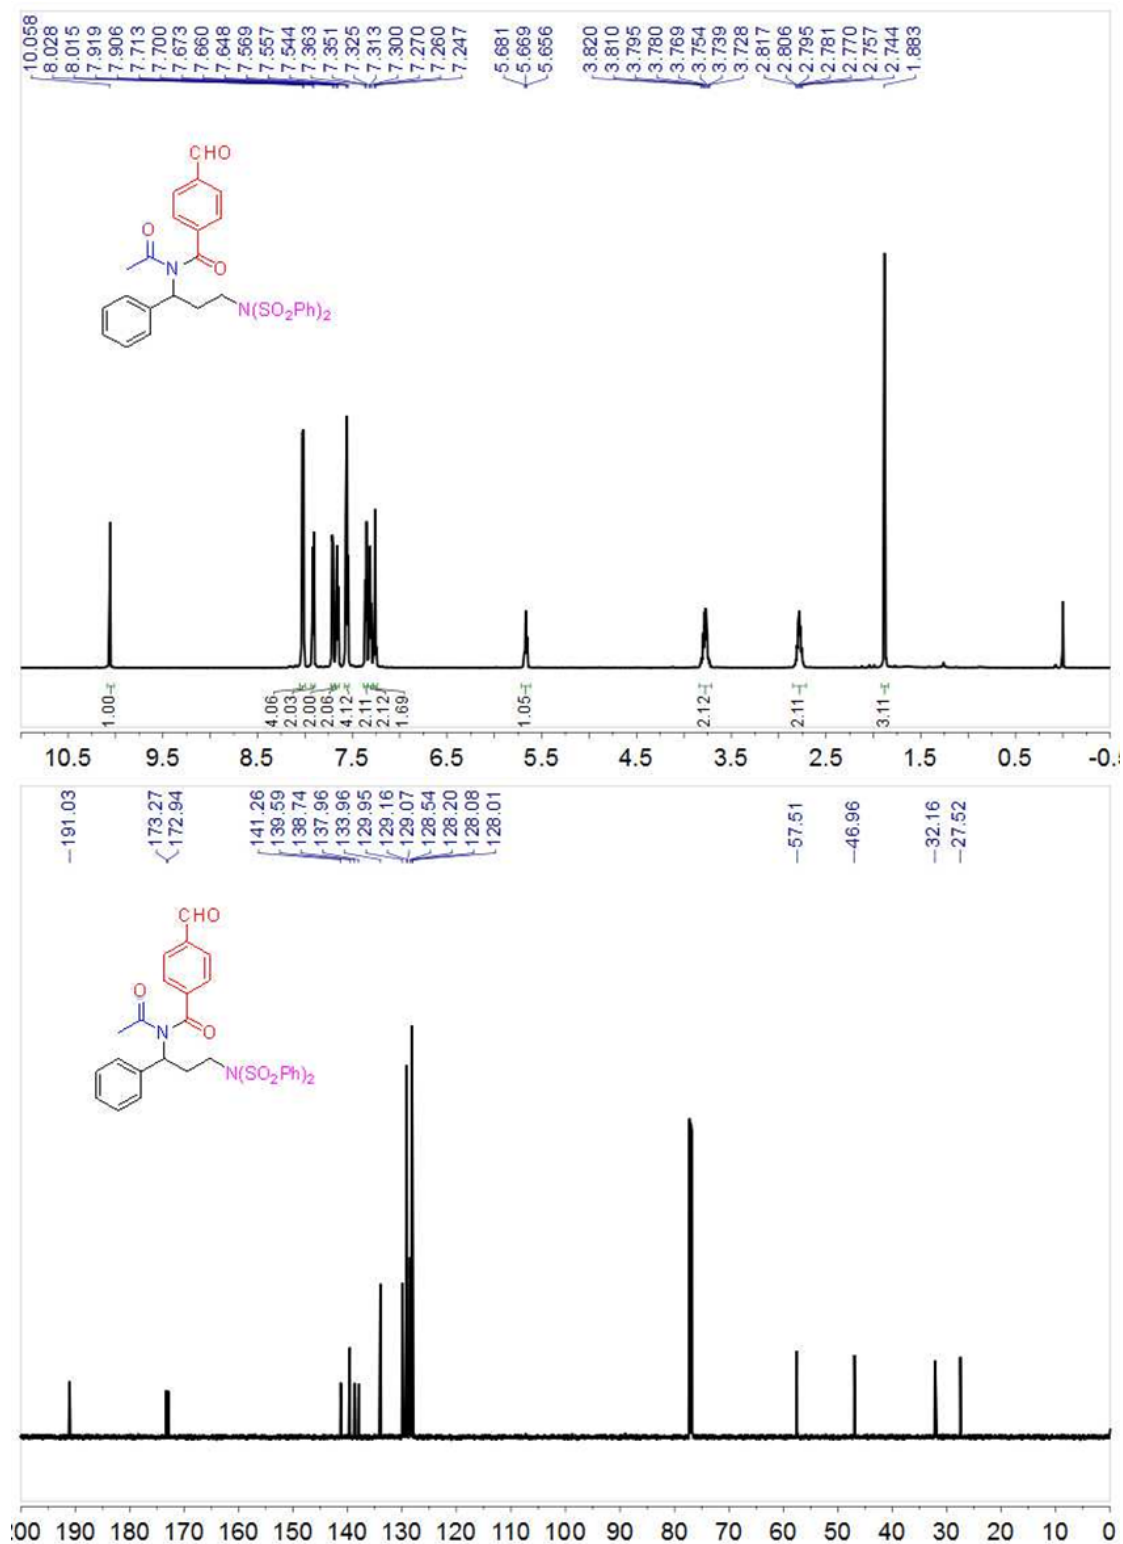



Compound **5d**

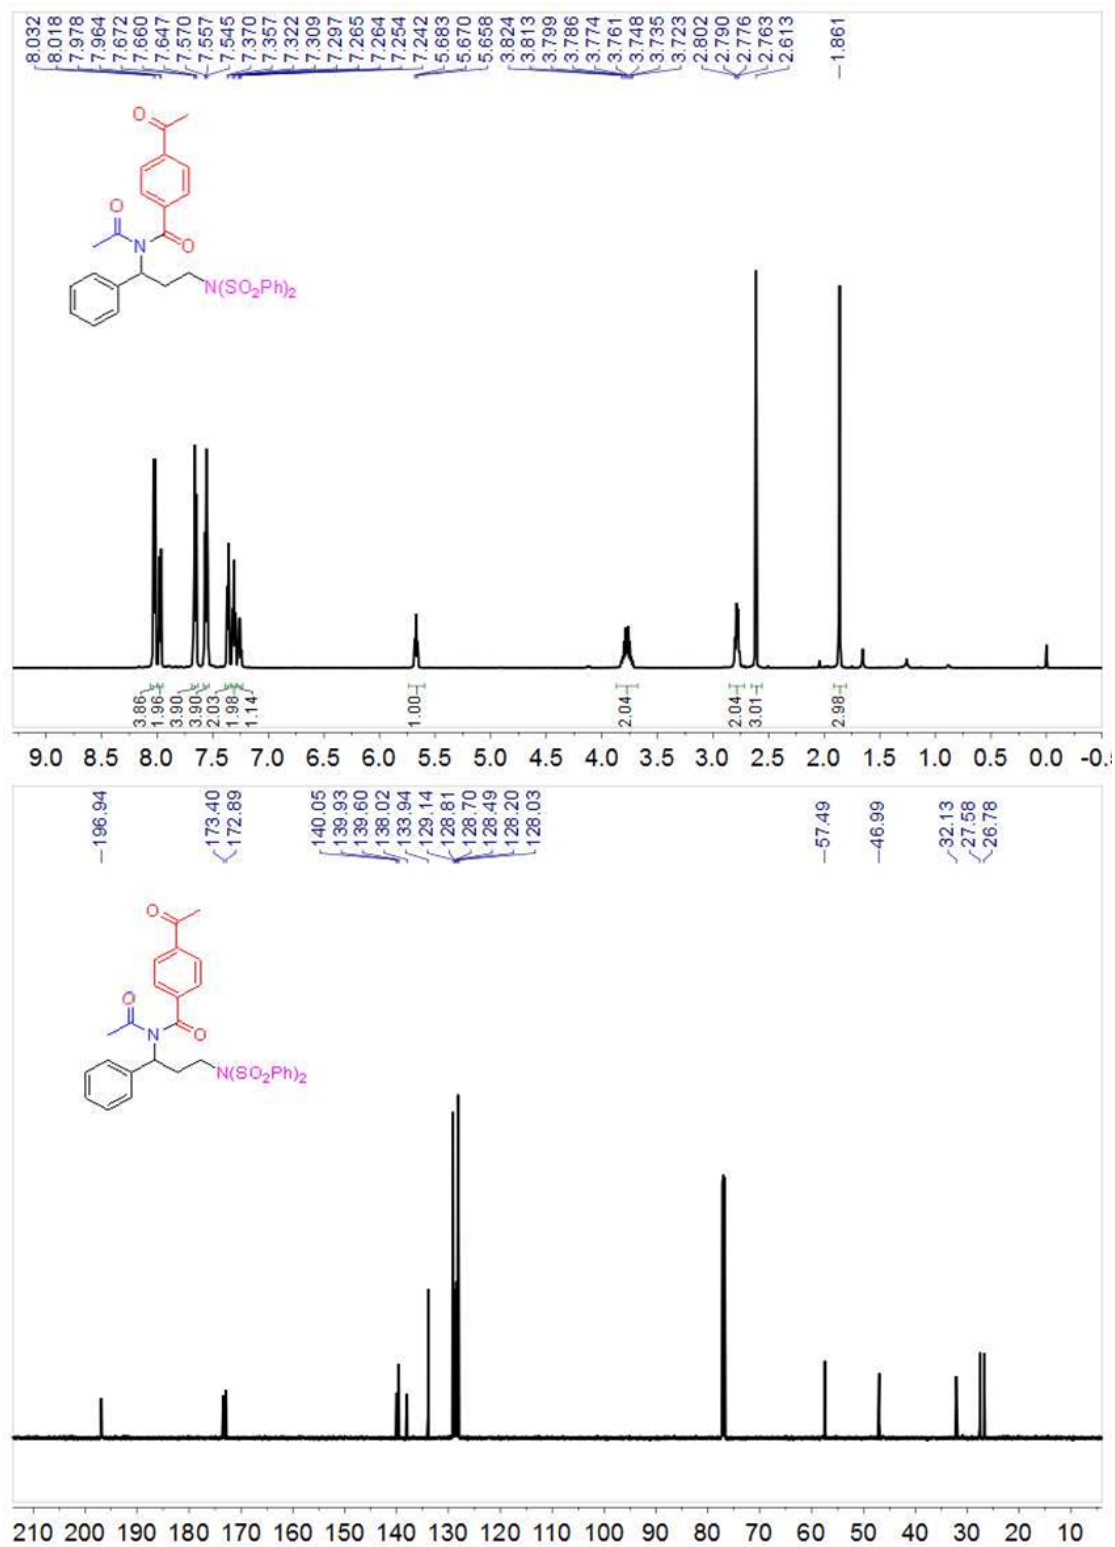



Compound **5e**

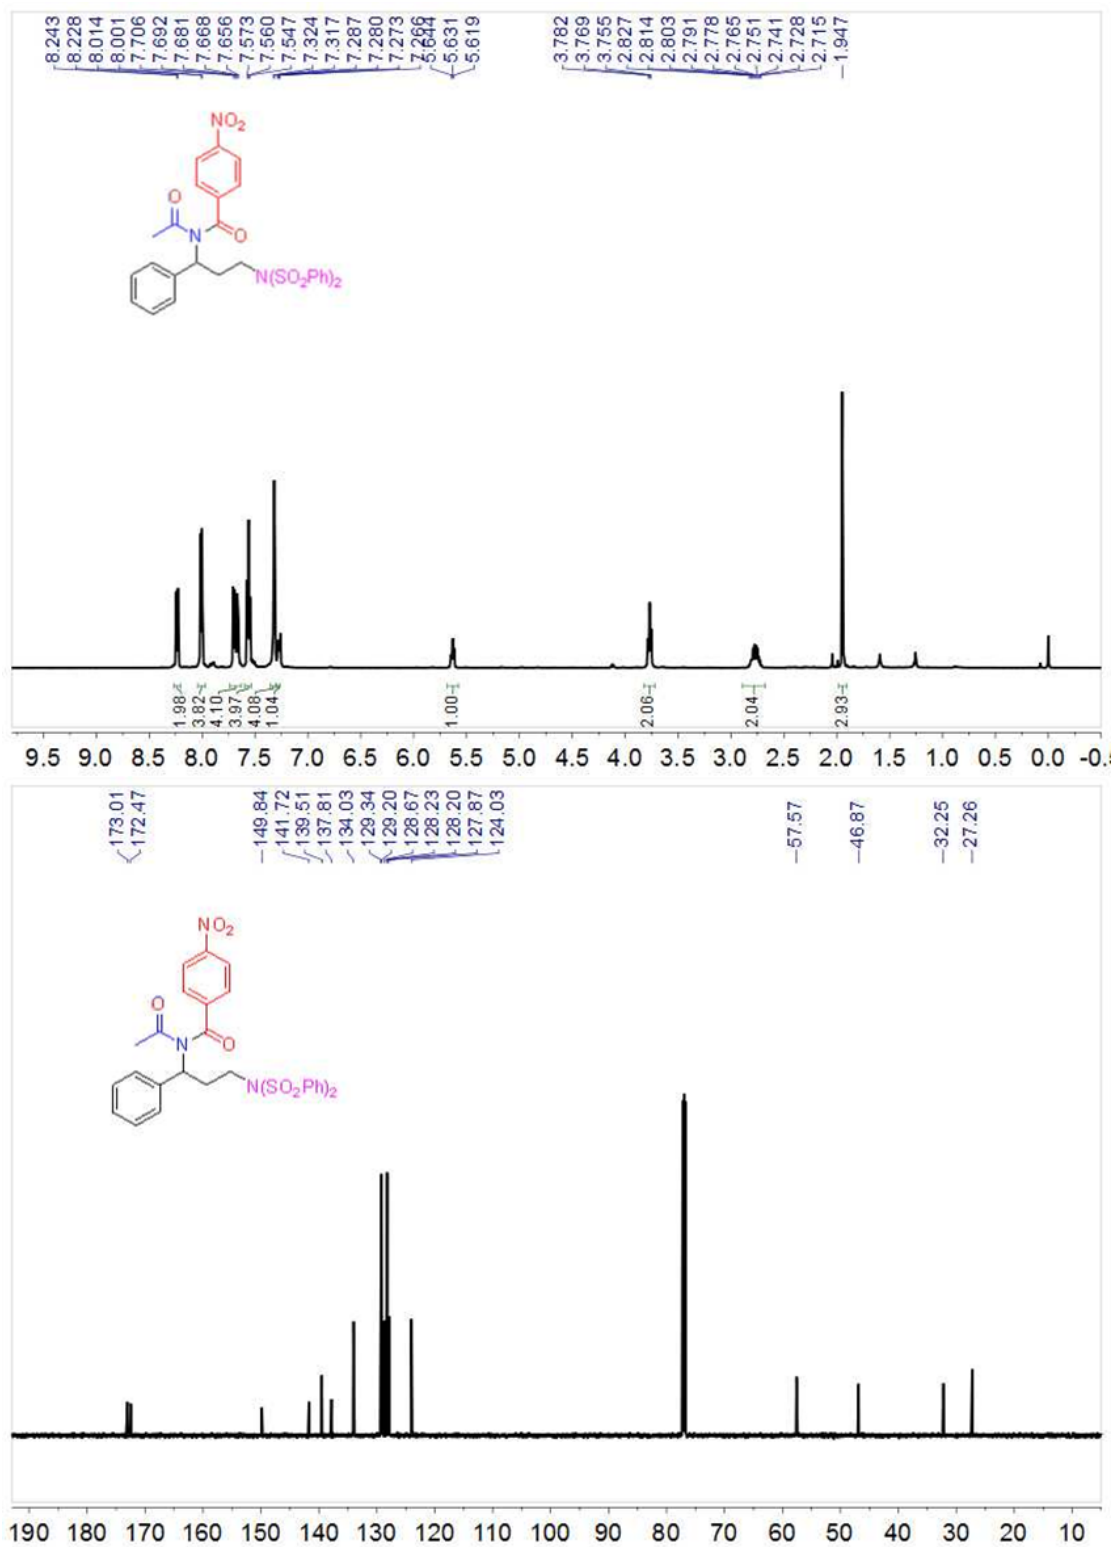

Compound **5f**

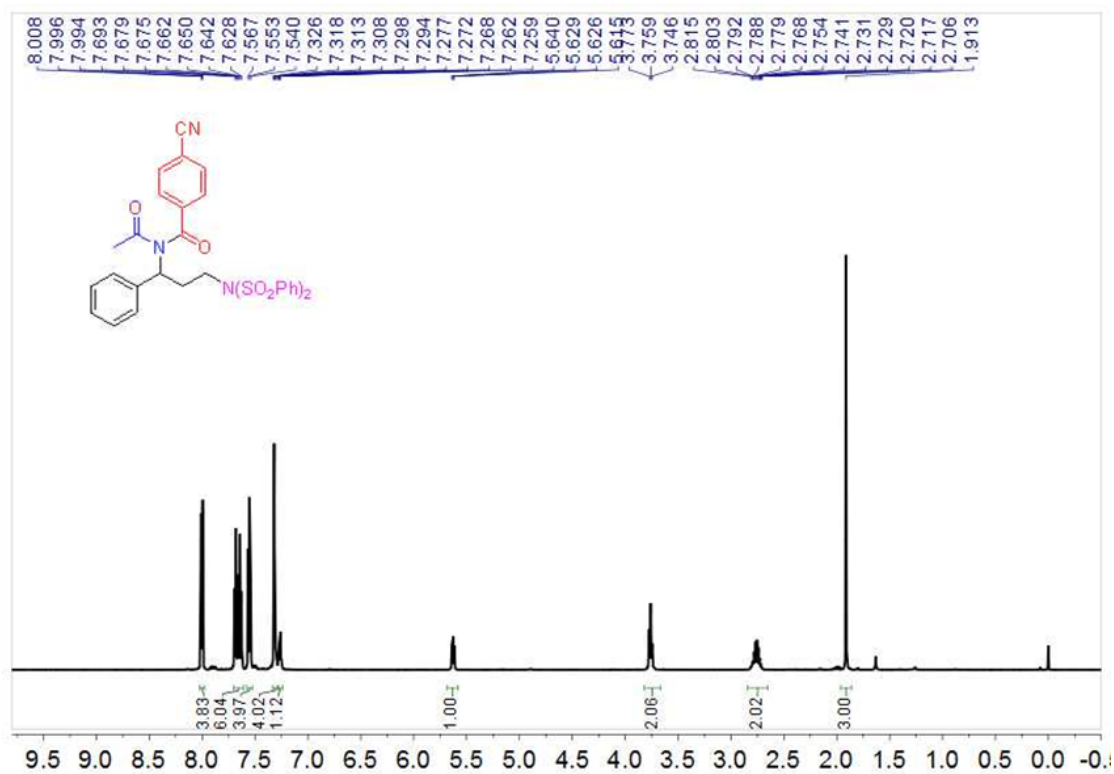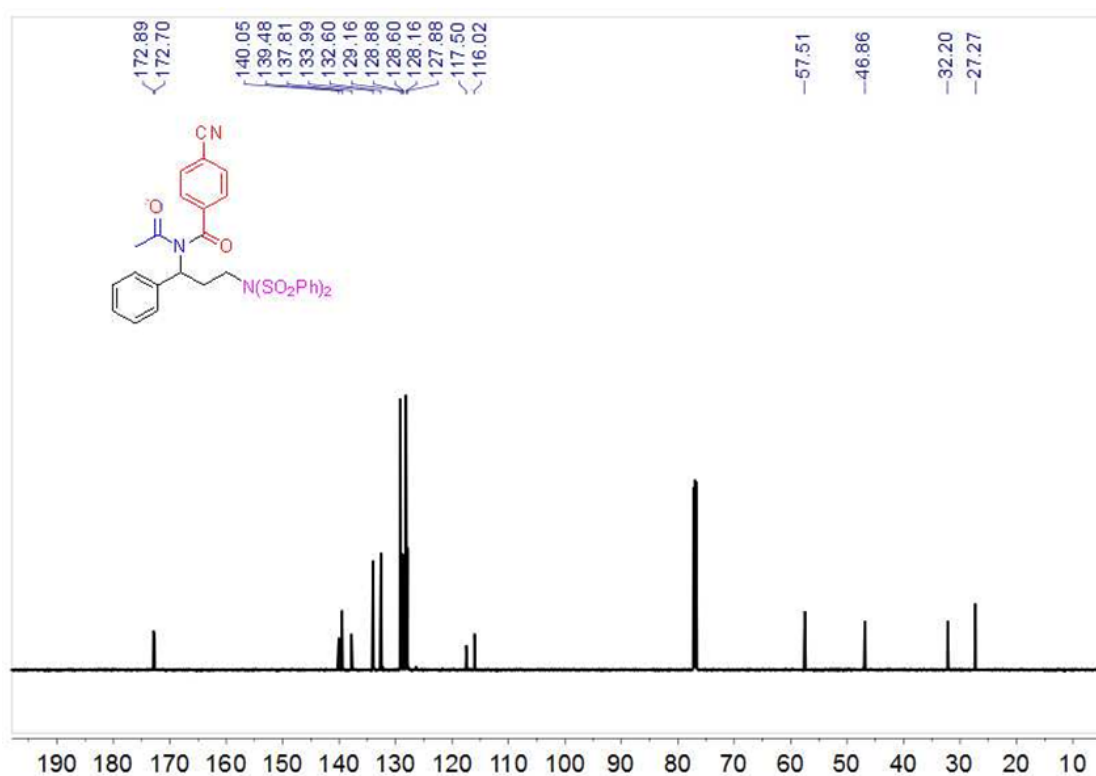

Compound **5g**

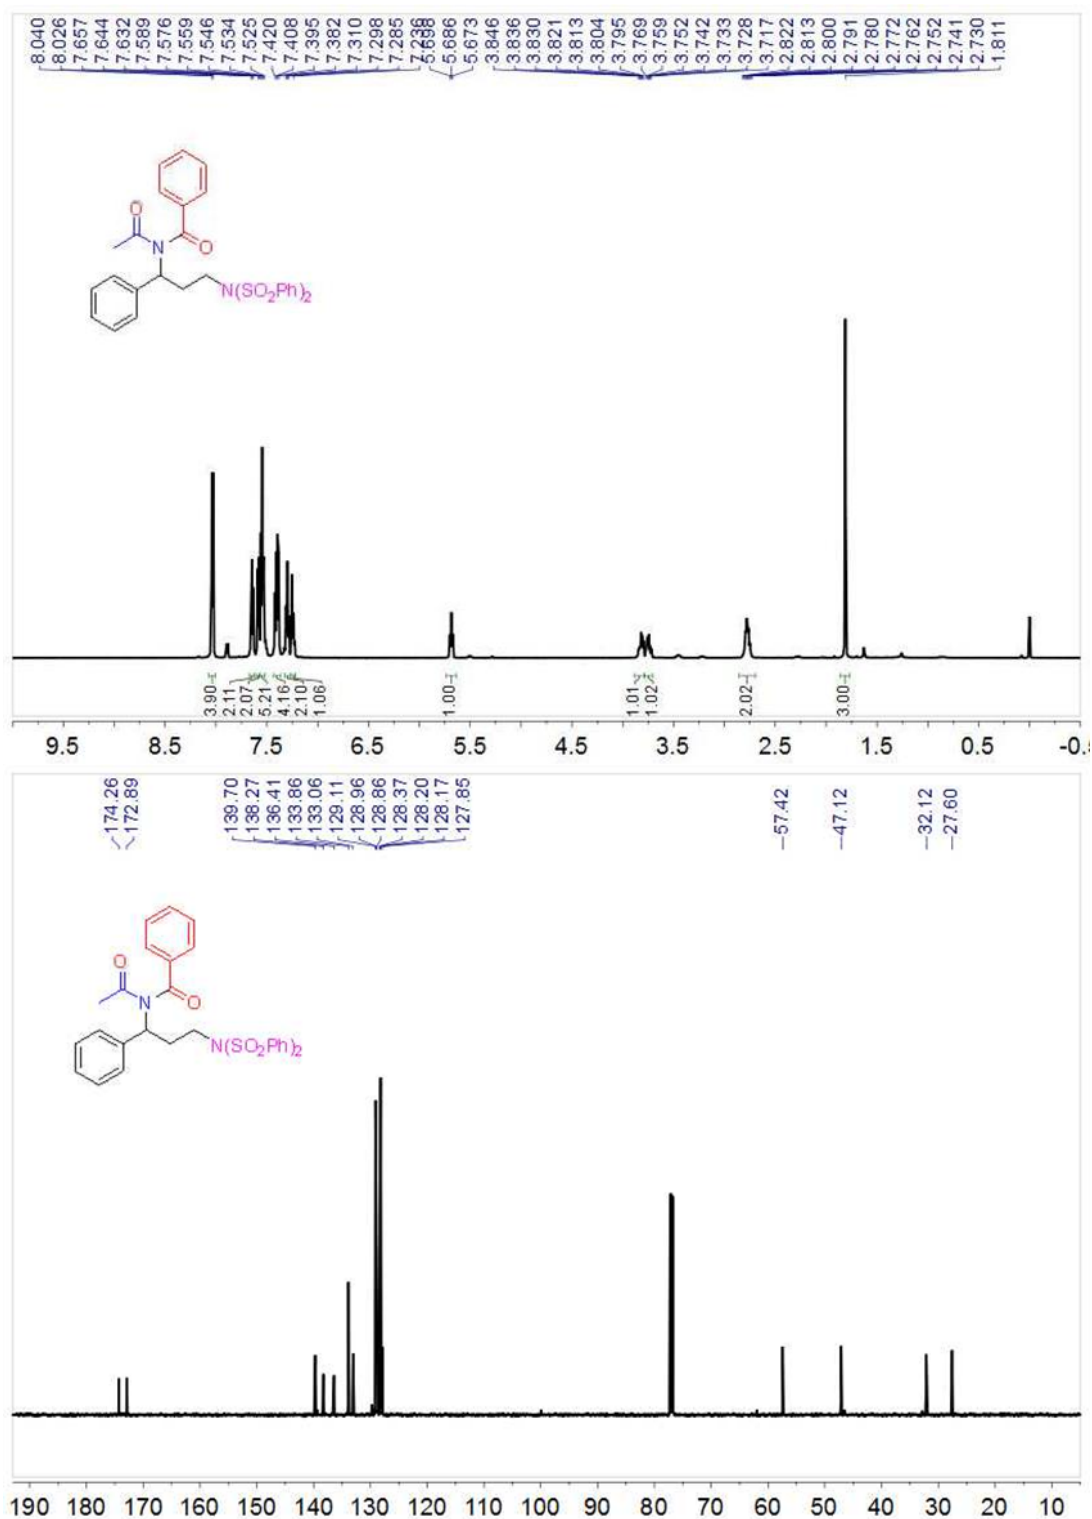

Compound **5h**

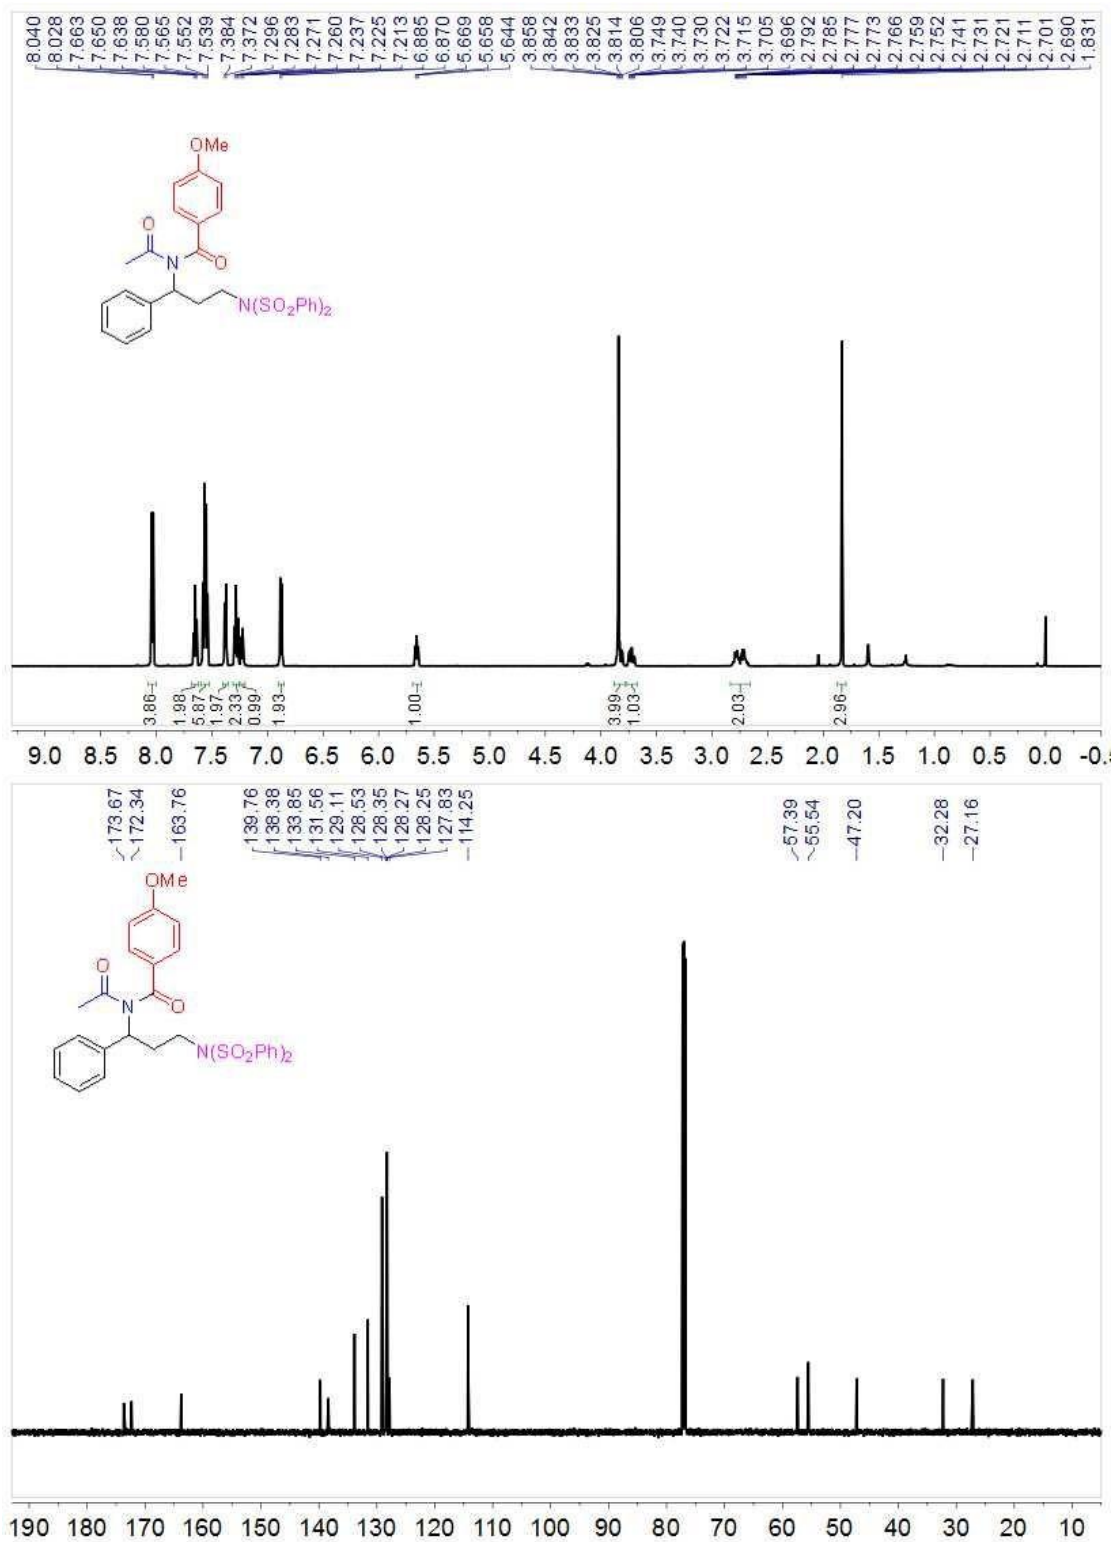

Compound **5i**

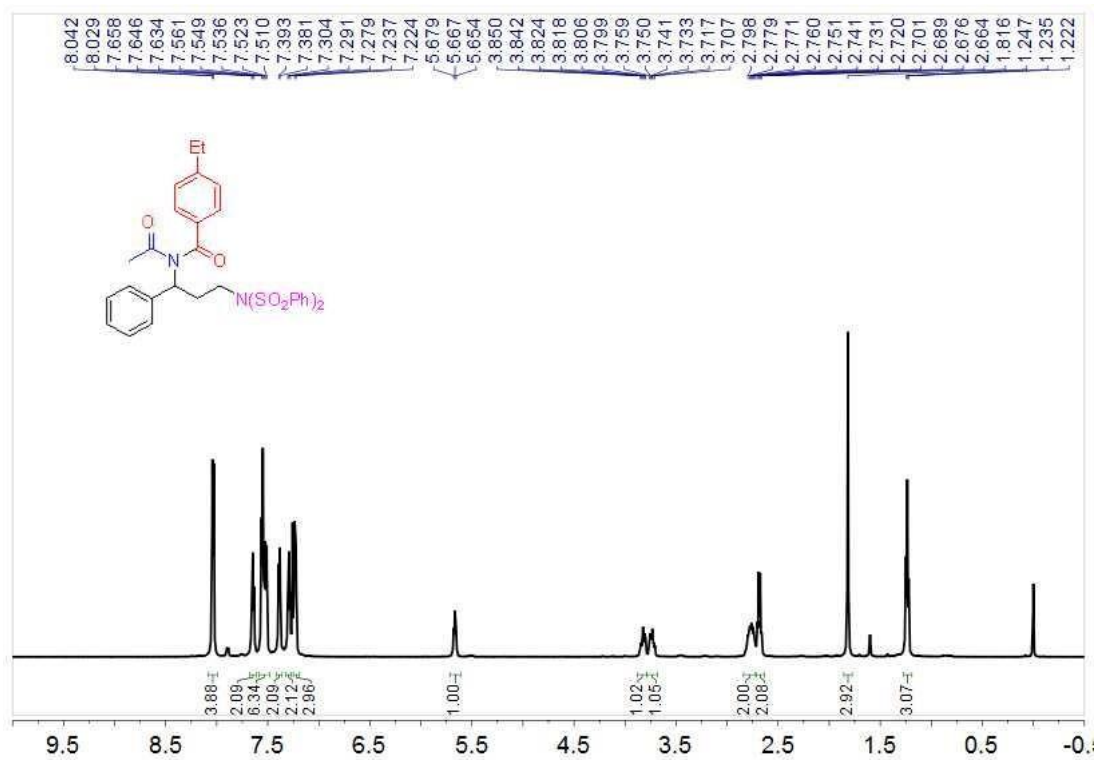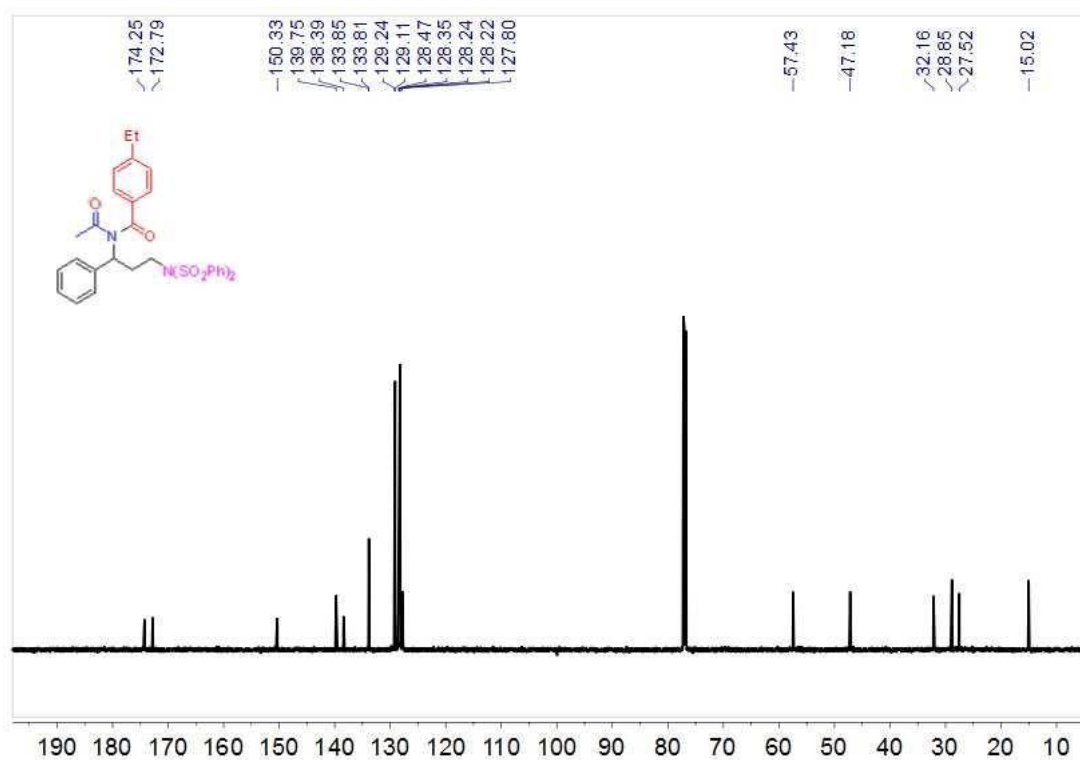

Compound **5j**

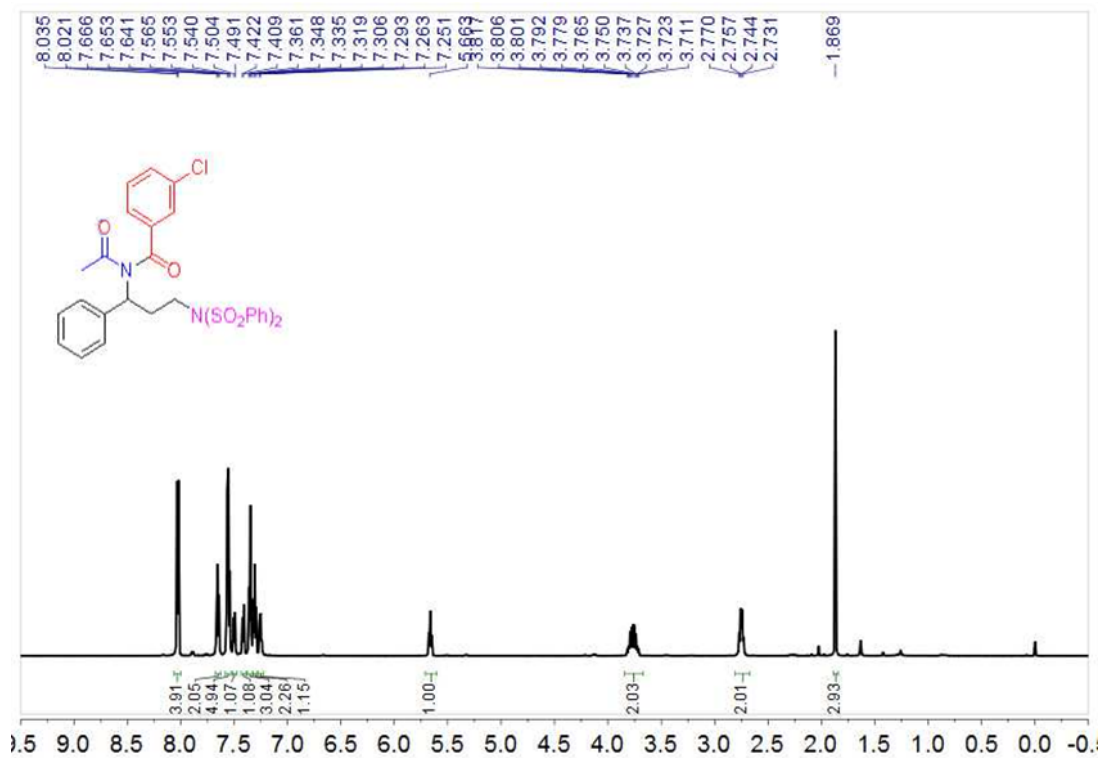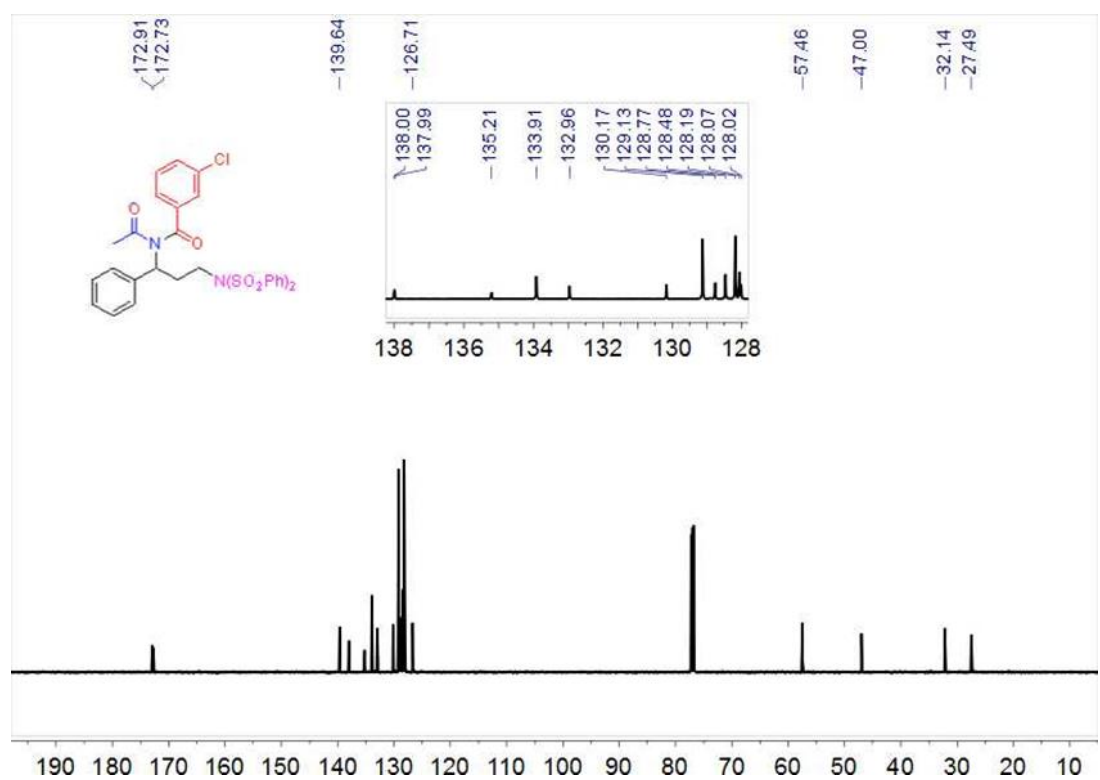

Compound **5k**

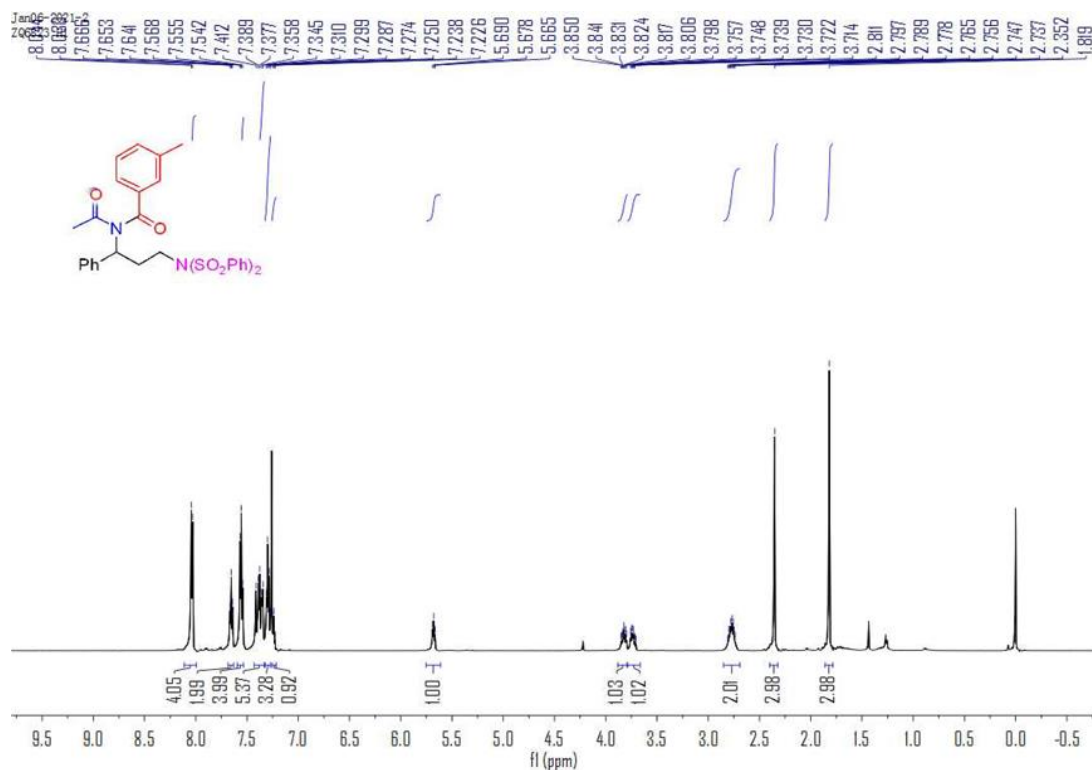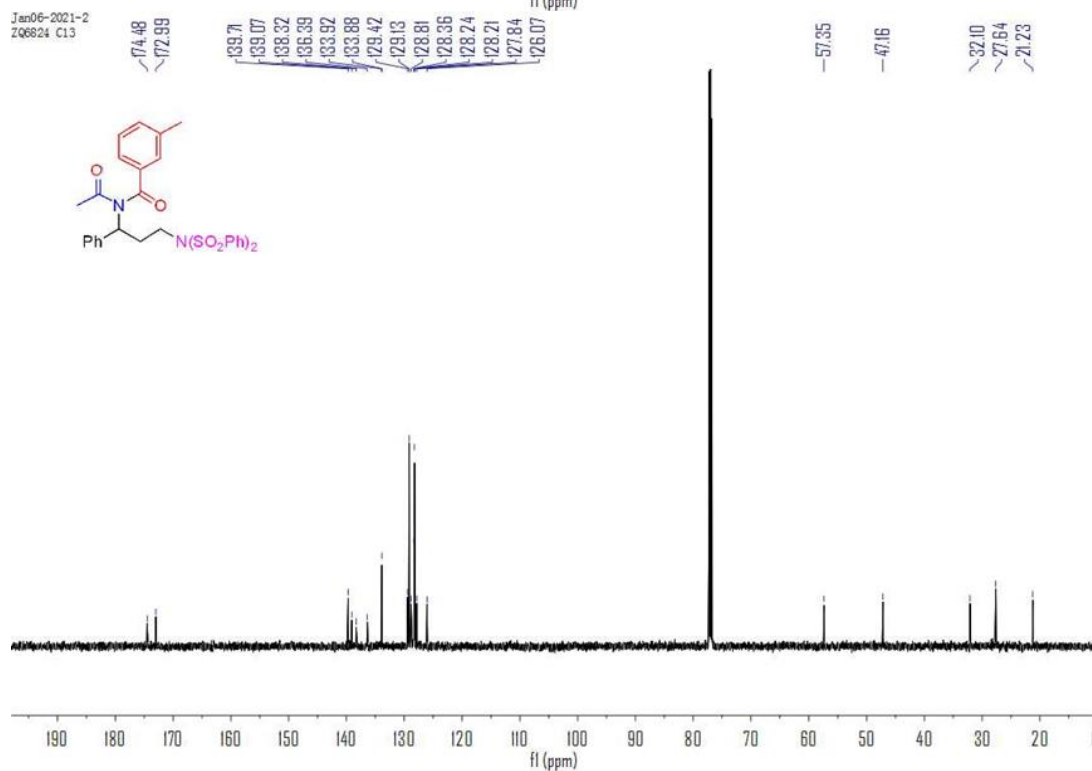



Compound **51**

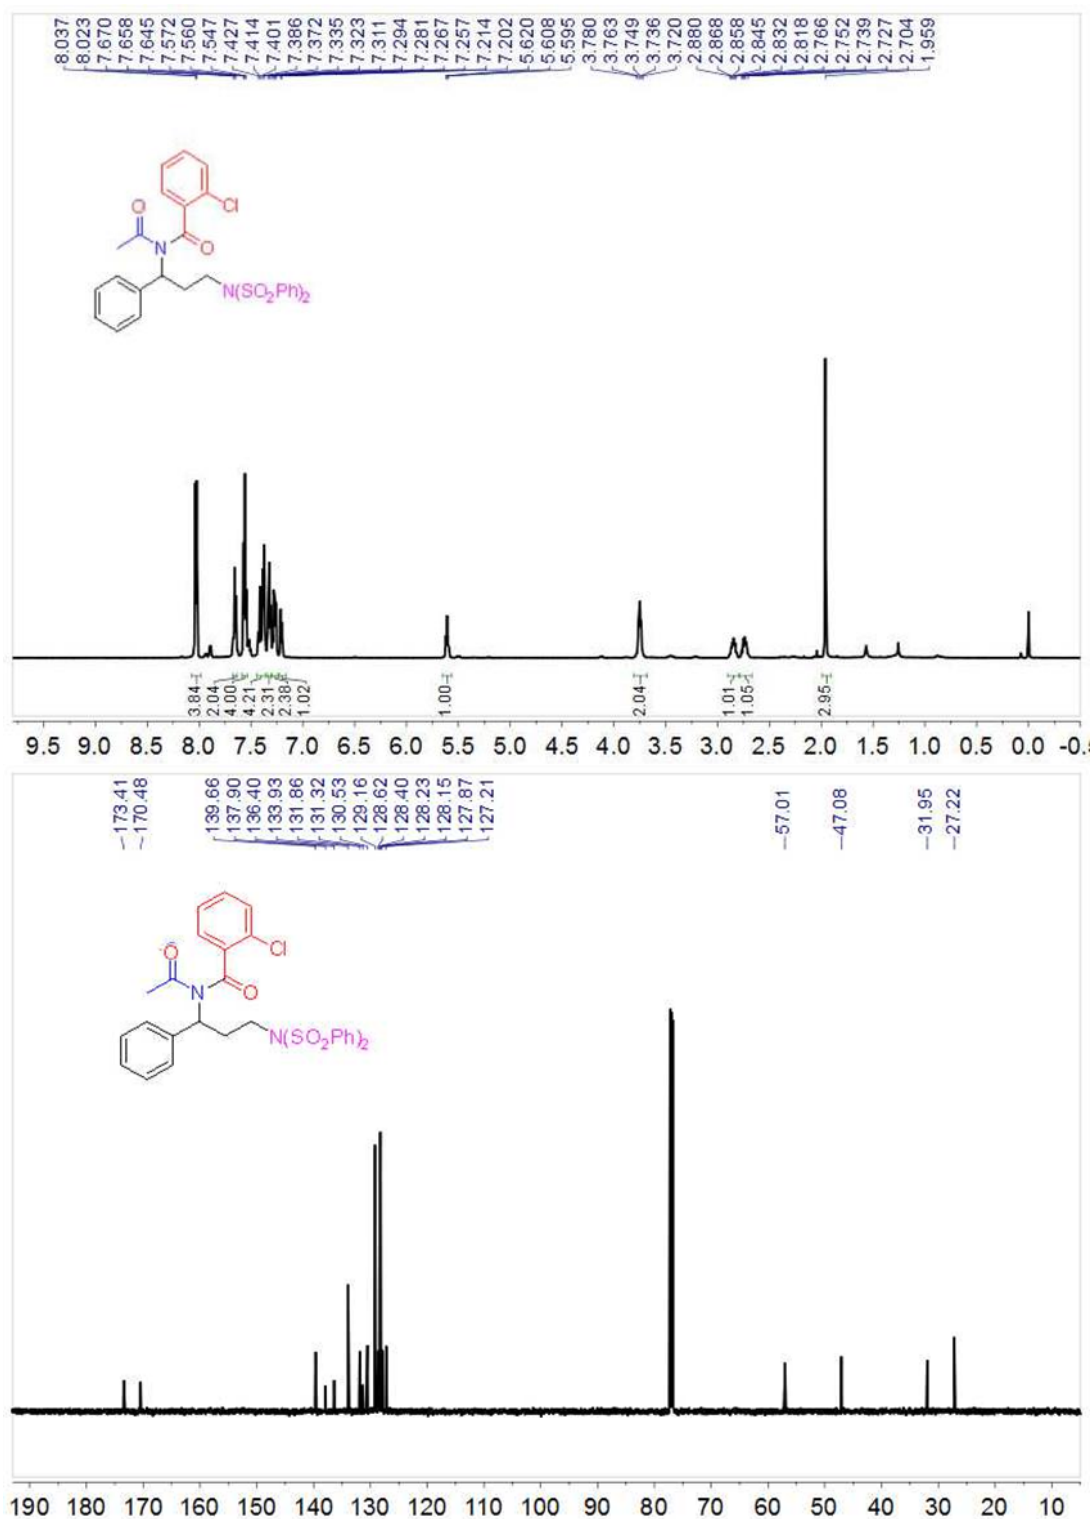



Compound **5m**

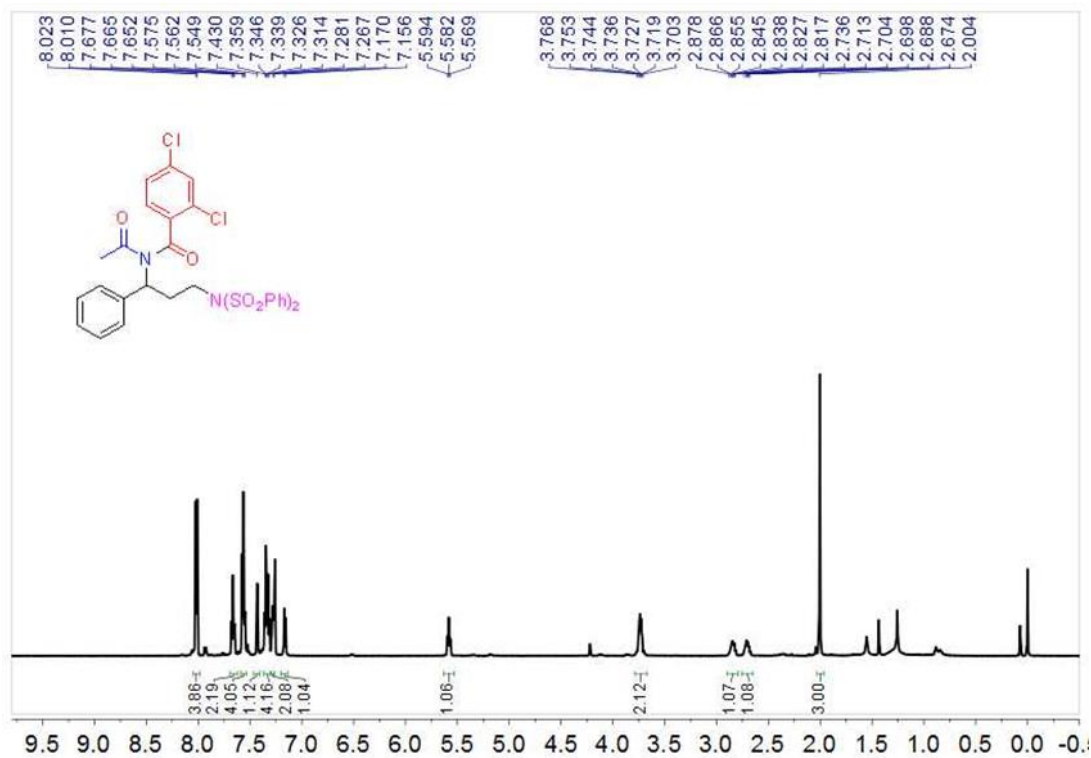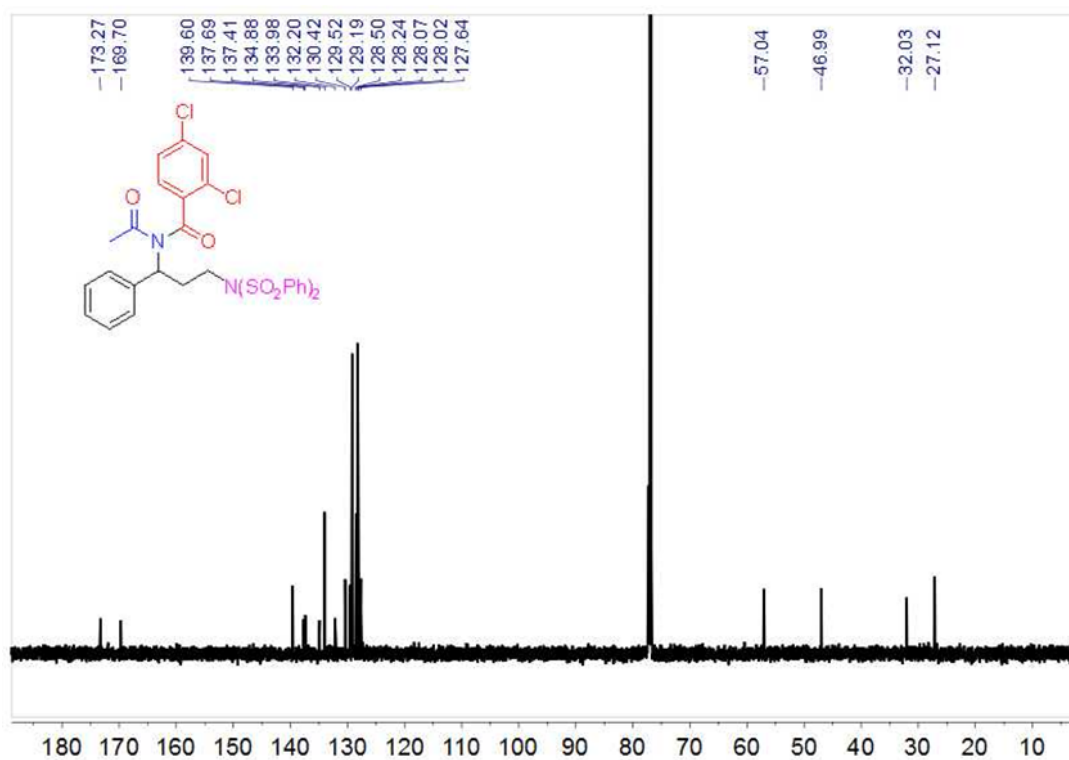

Compound **5n**

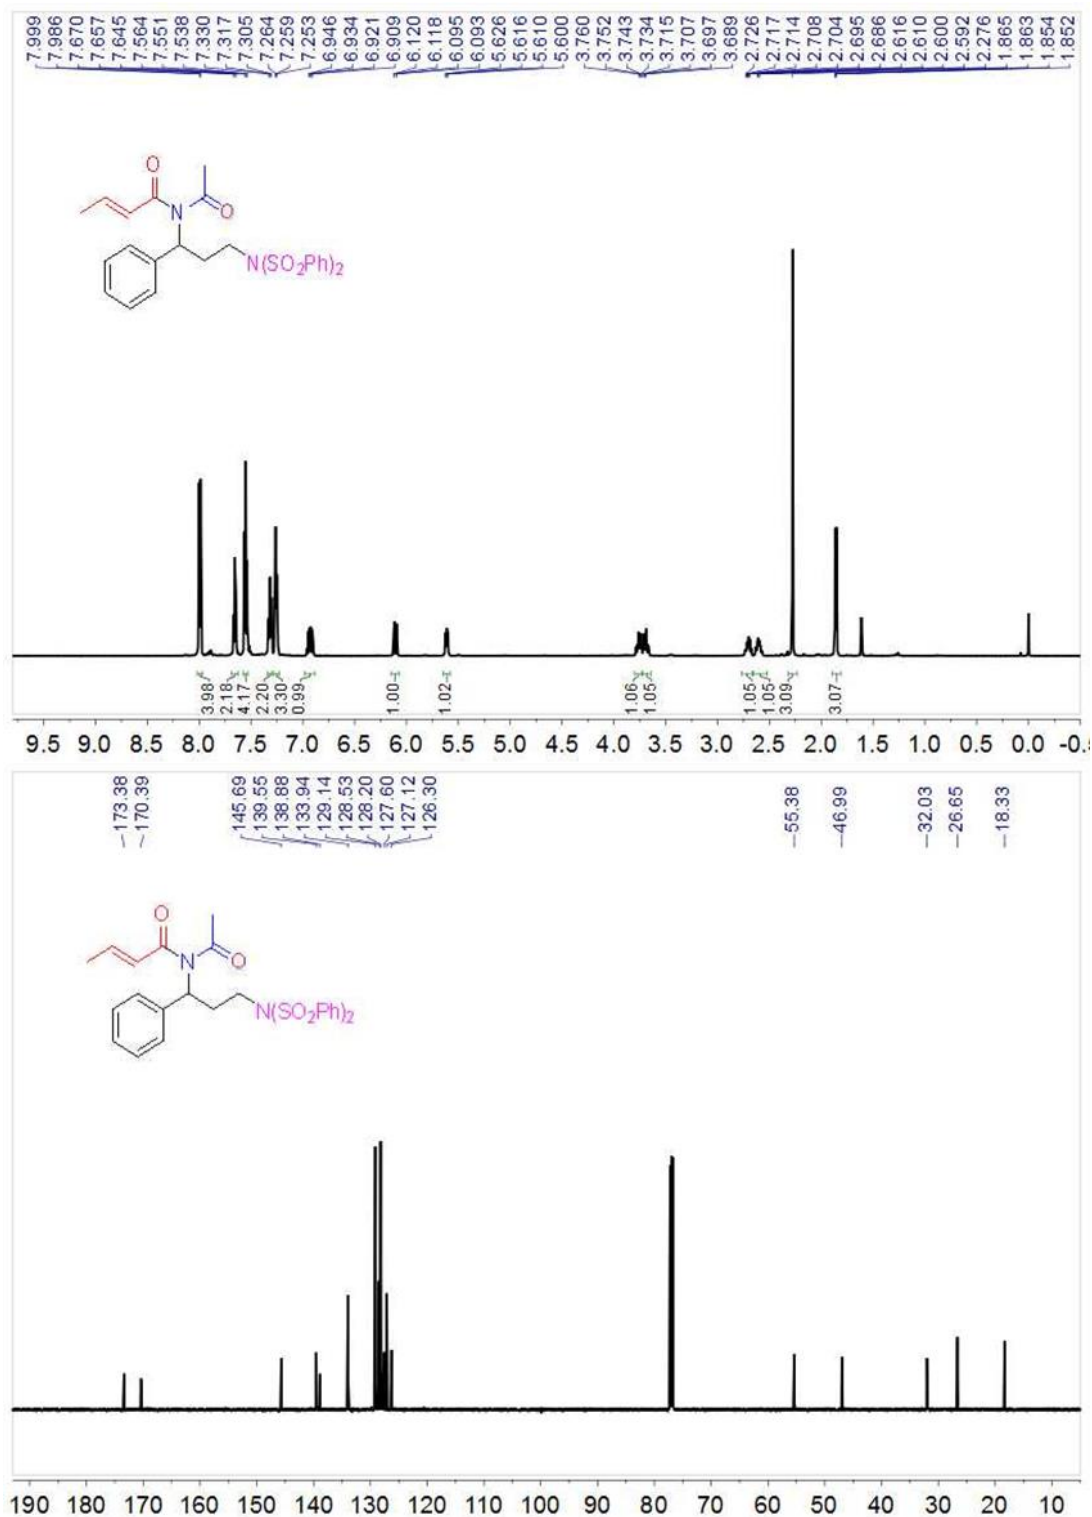

Compound **5o**

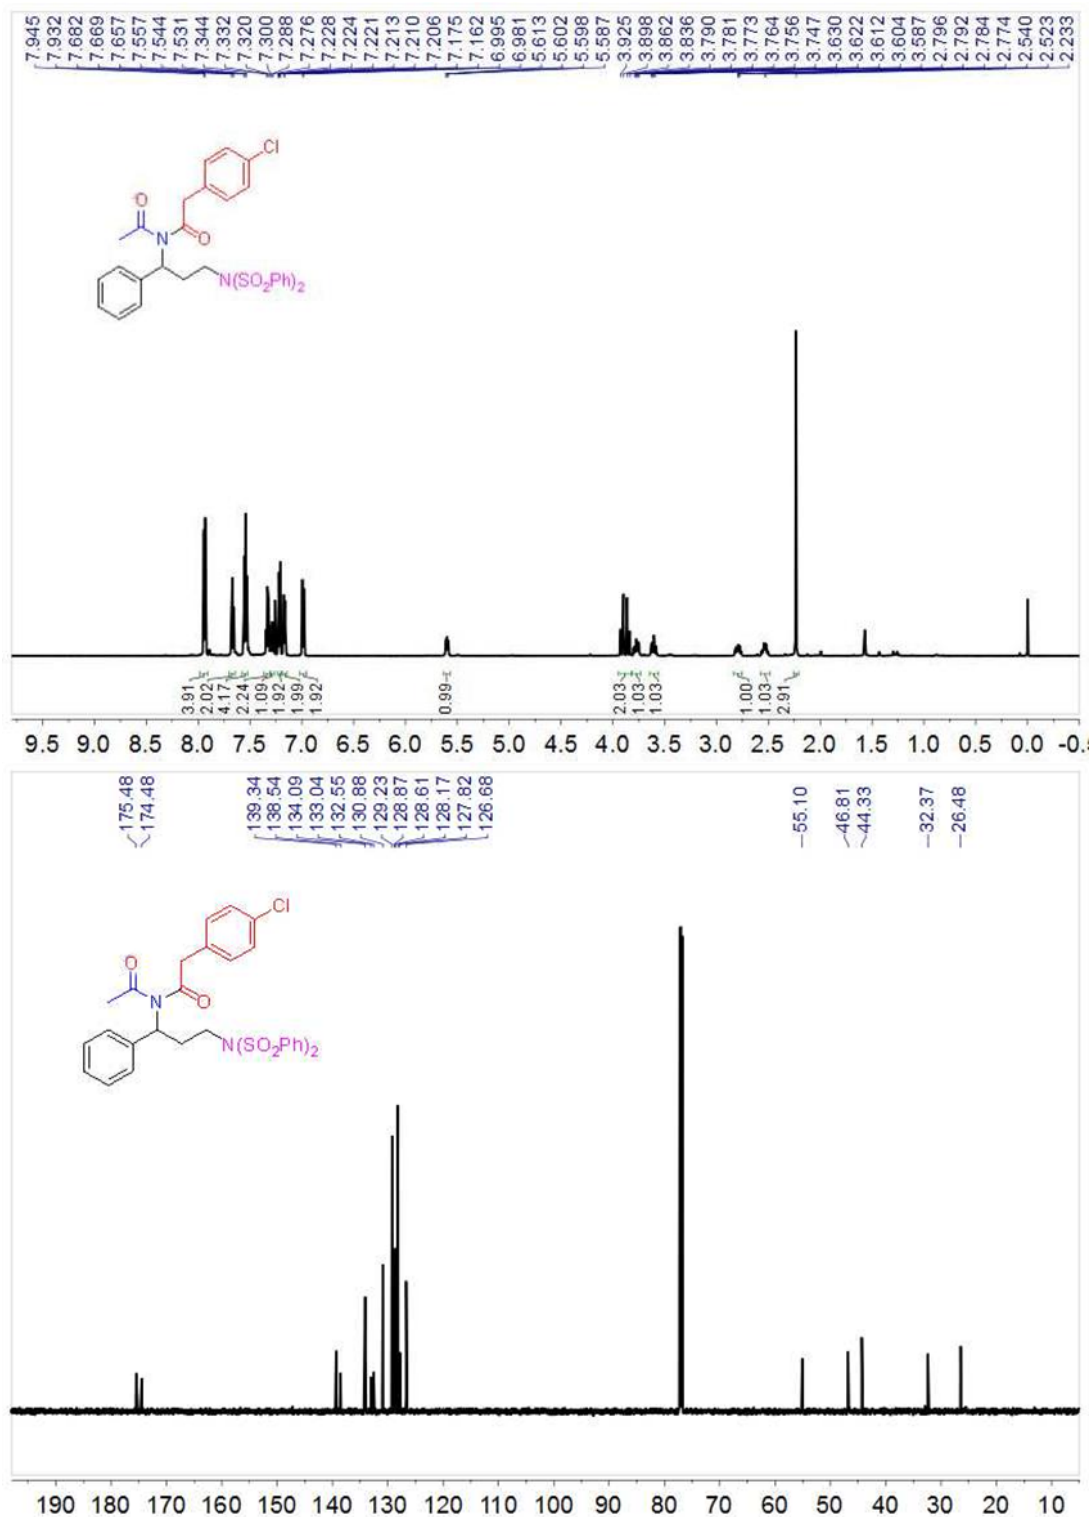

Compound **5p**

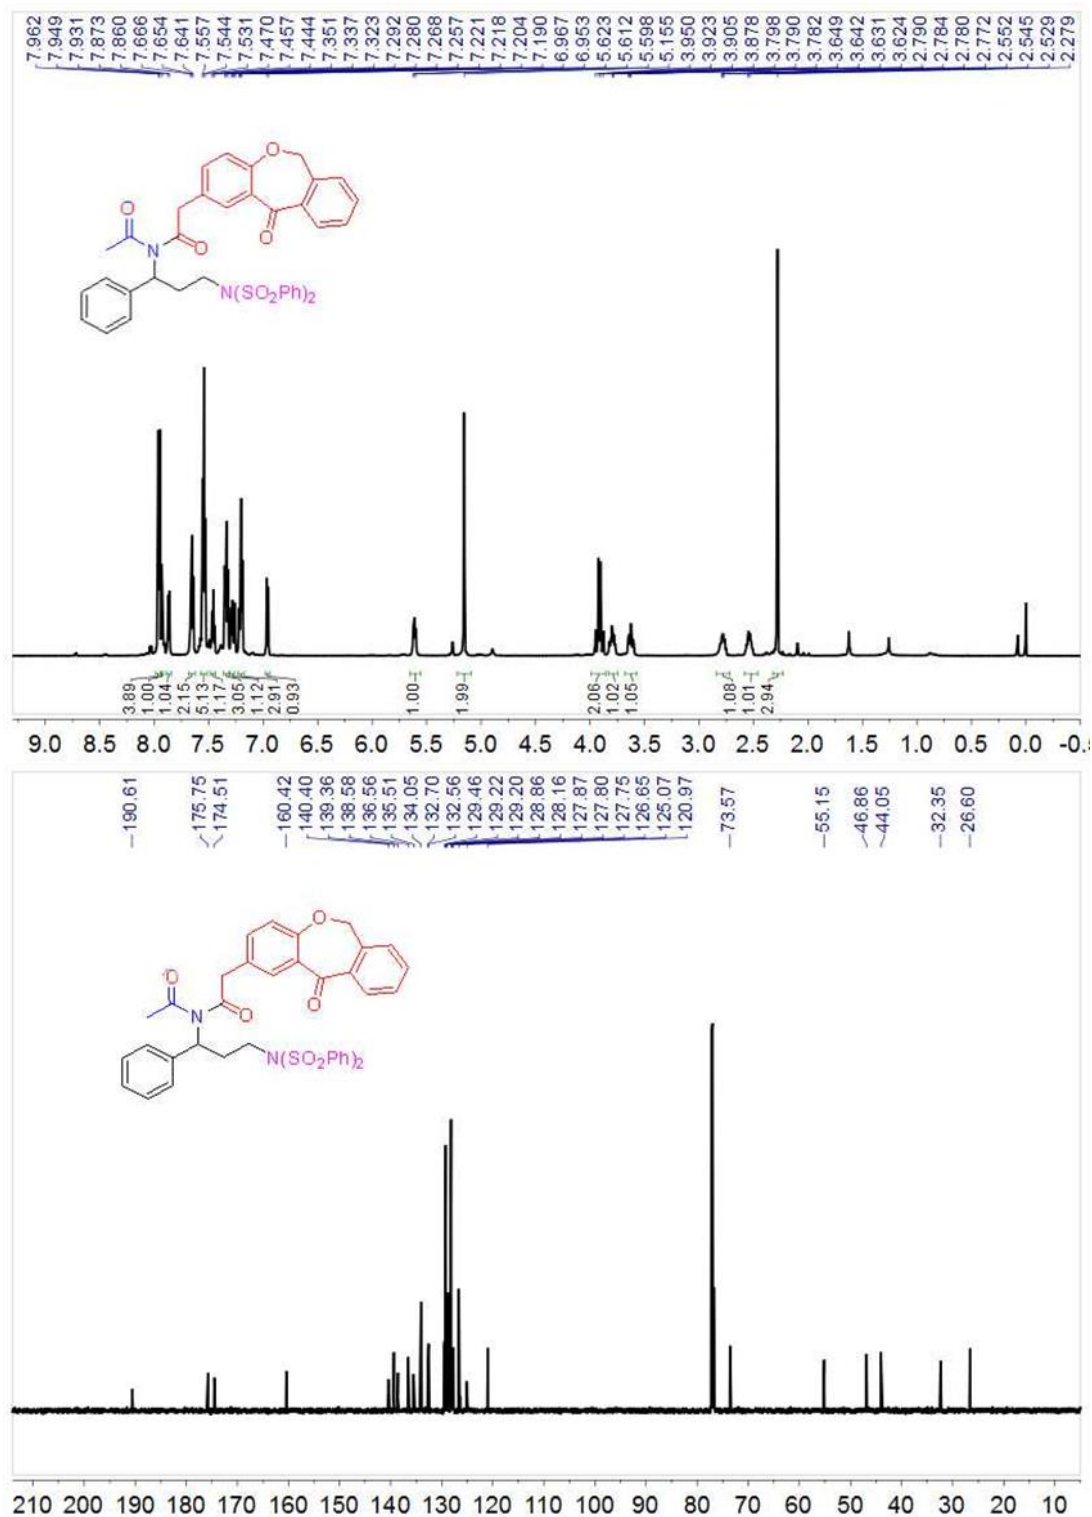

Compound **5q**

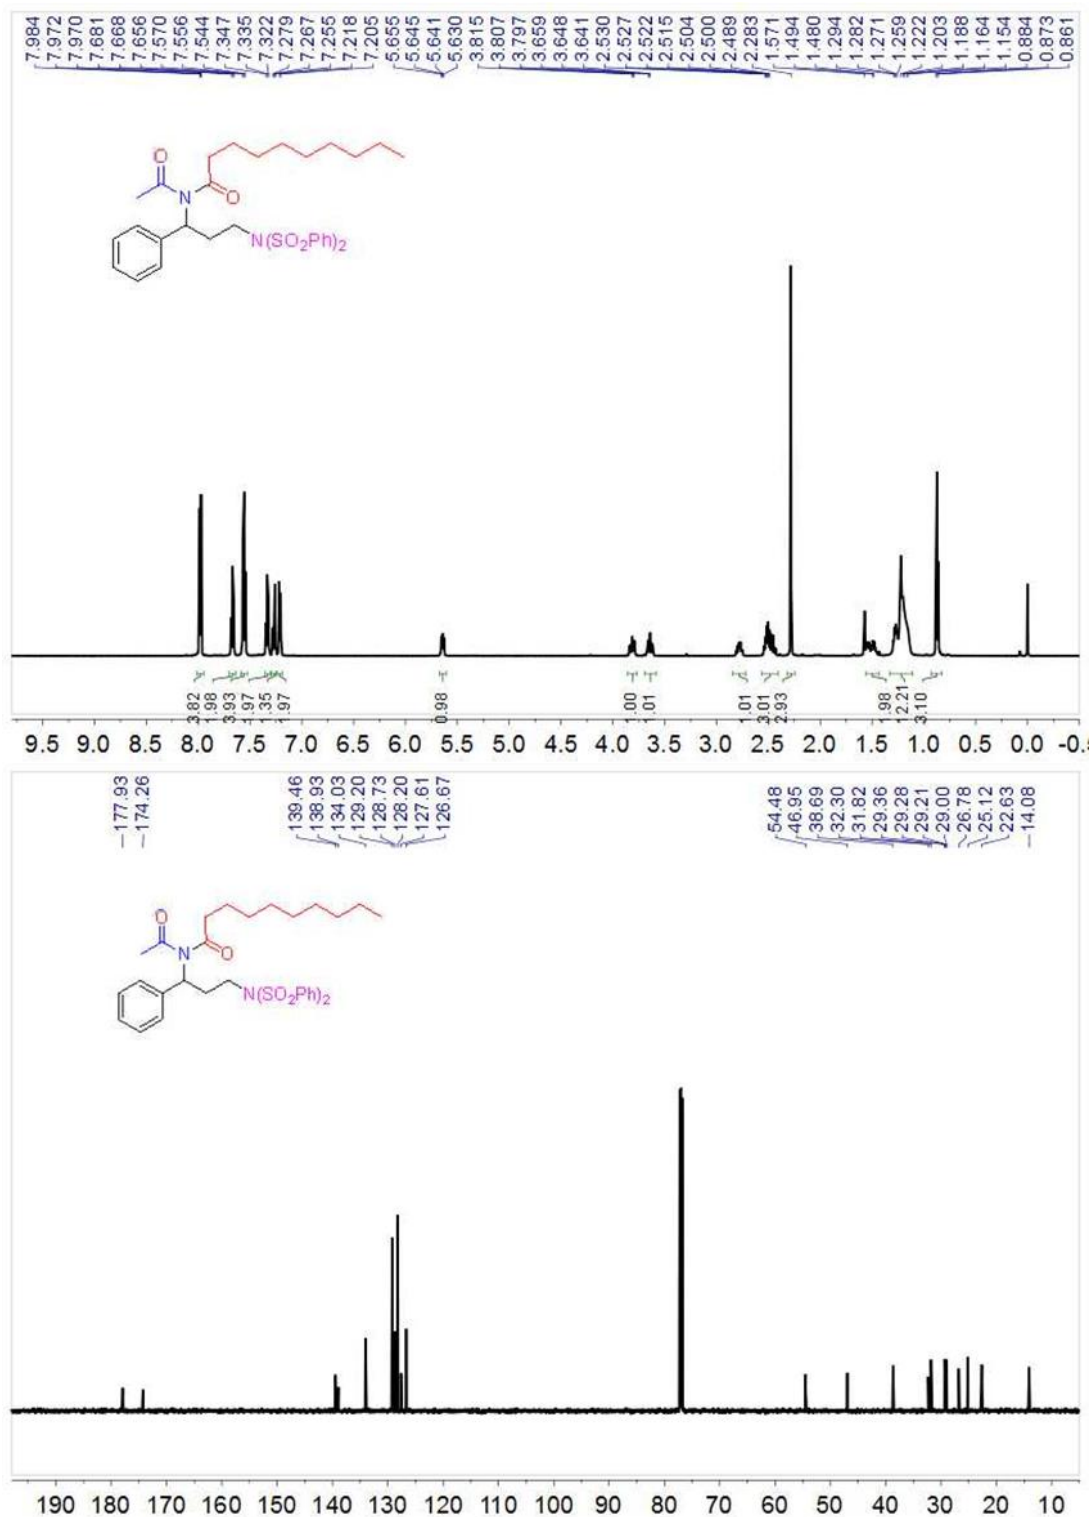

Compound **7a**

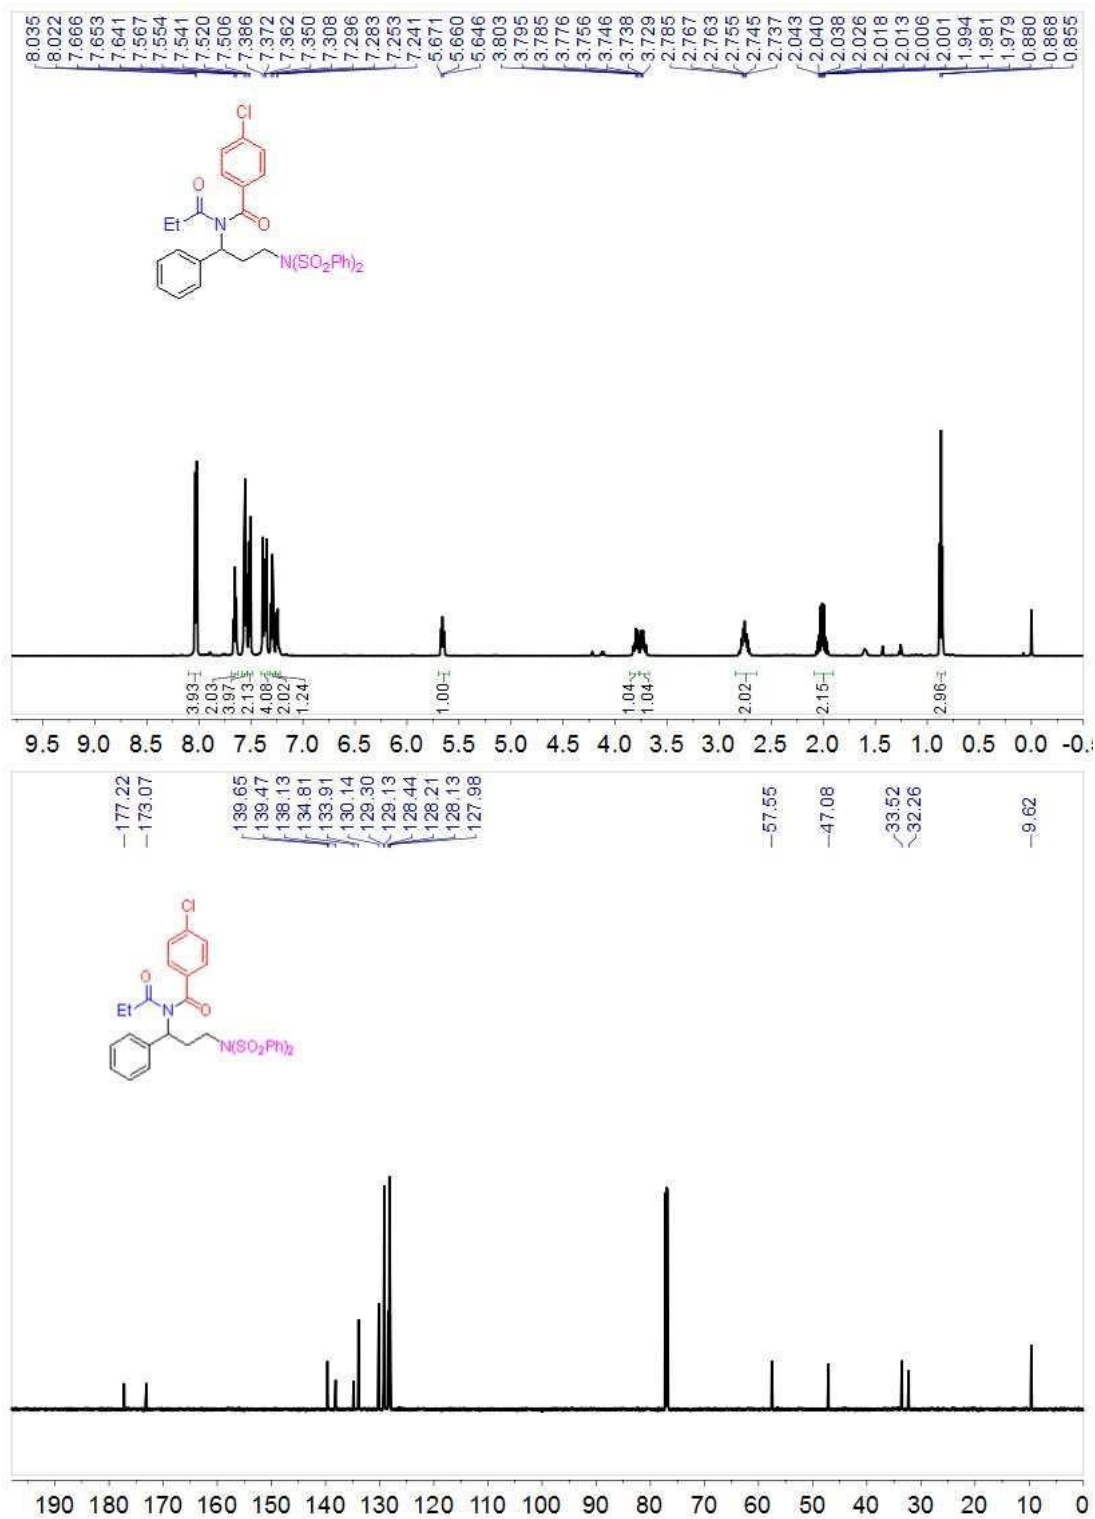

Compound **7b**

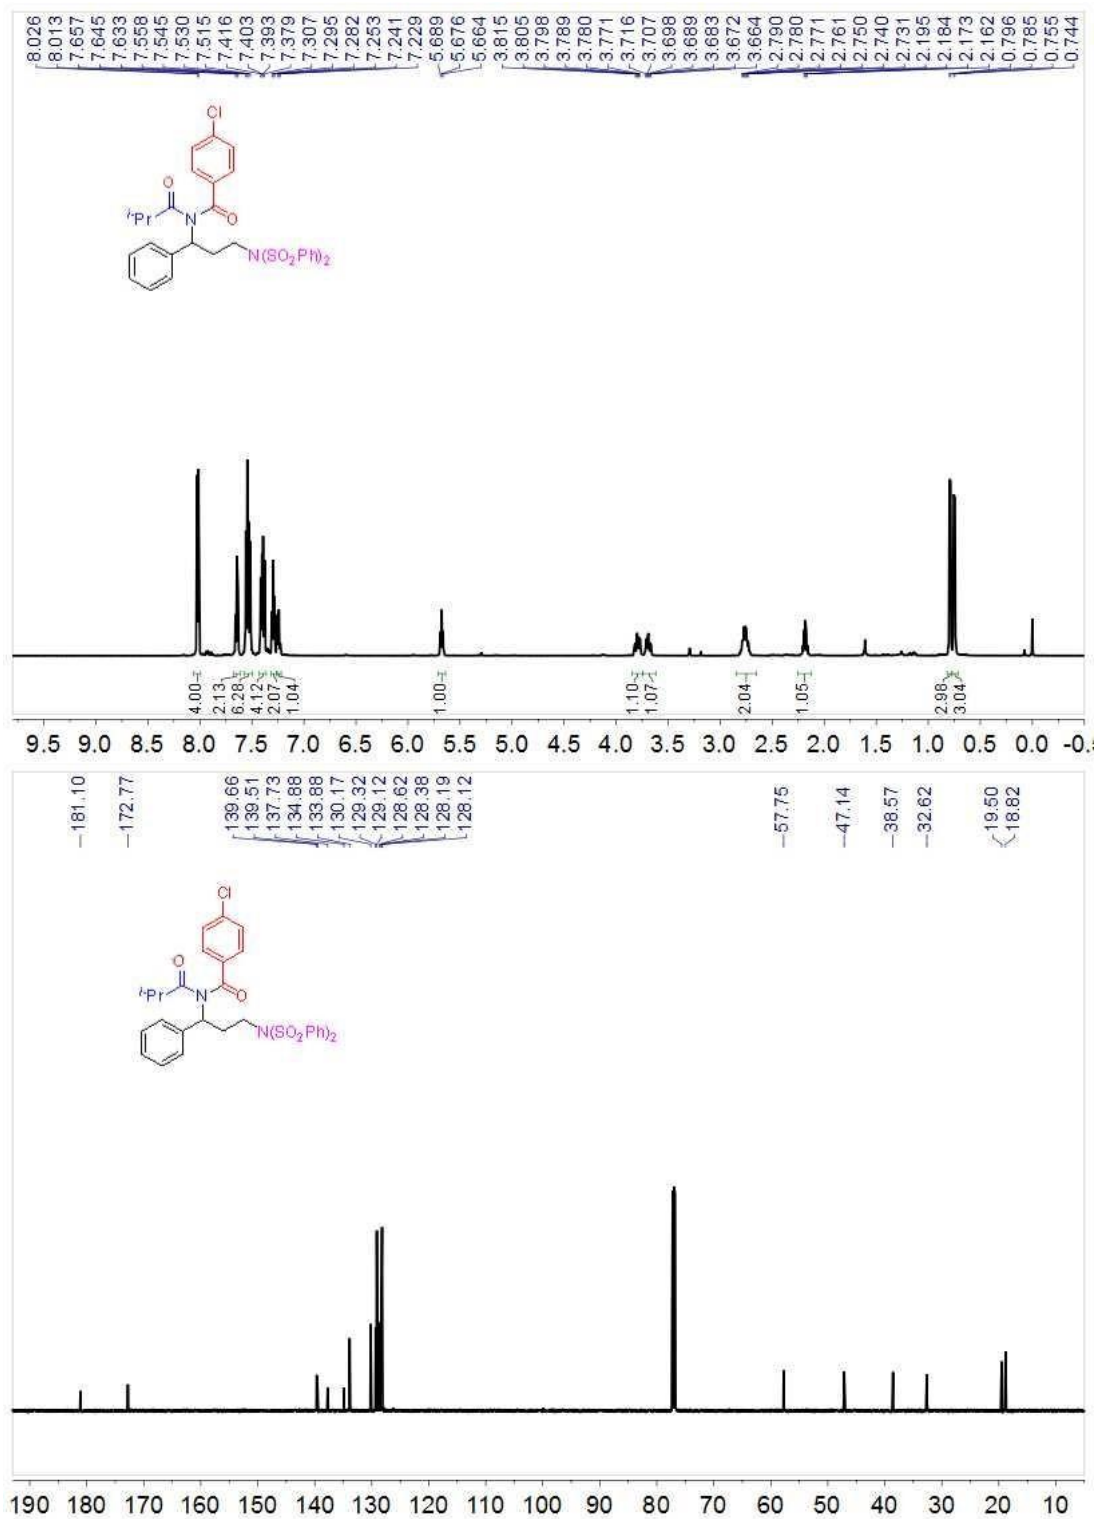



Compound **7c**

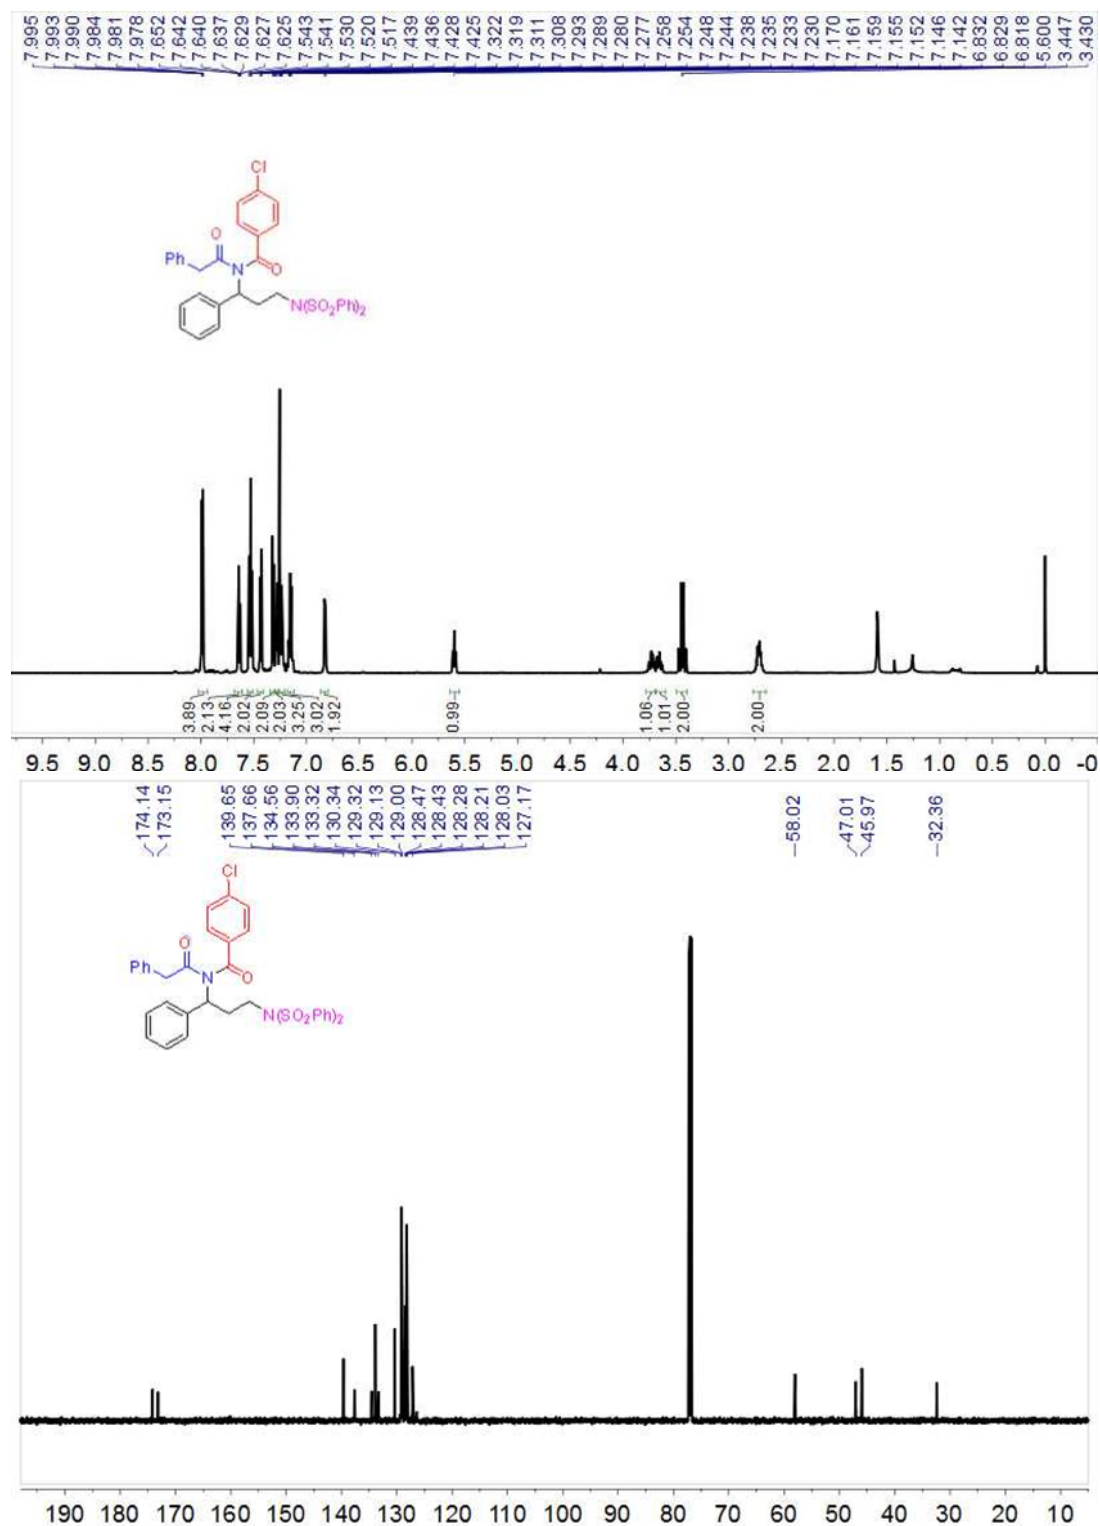



Compound **7d**

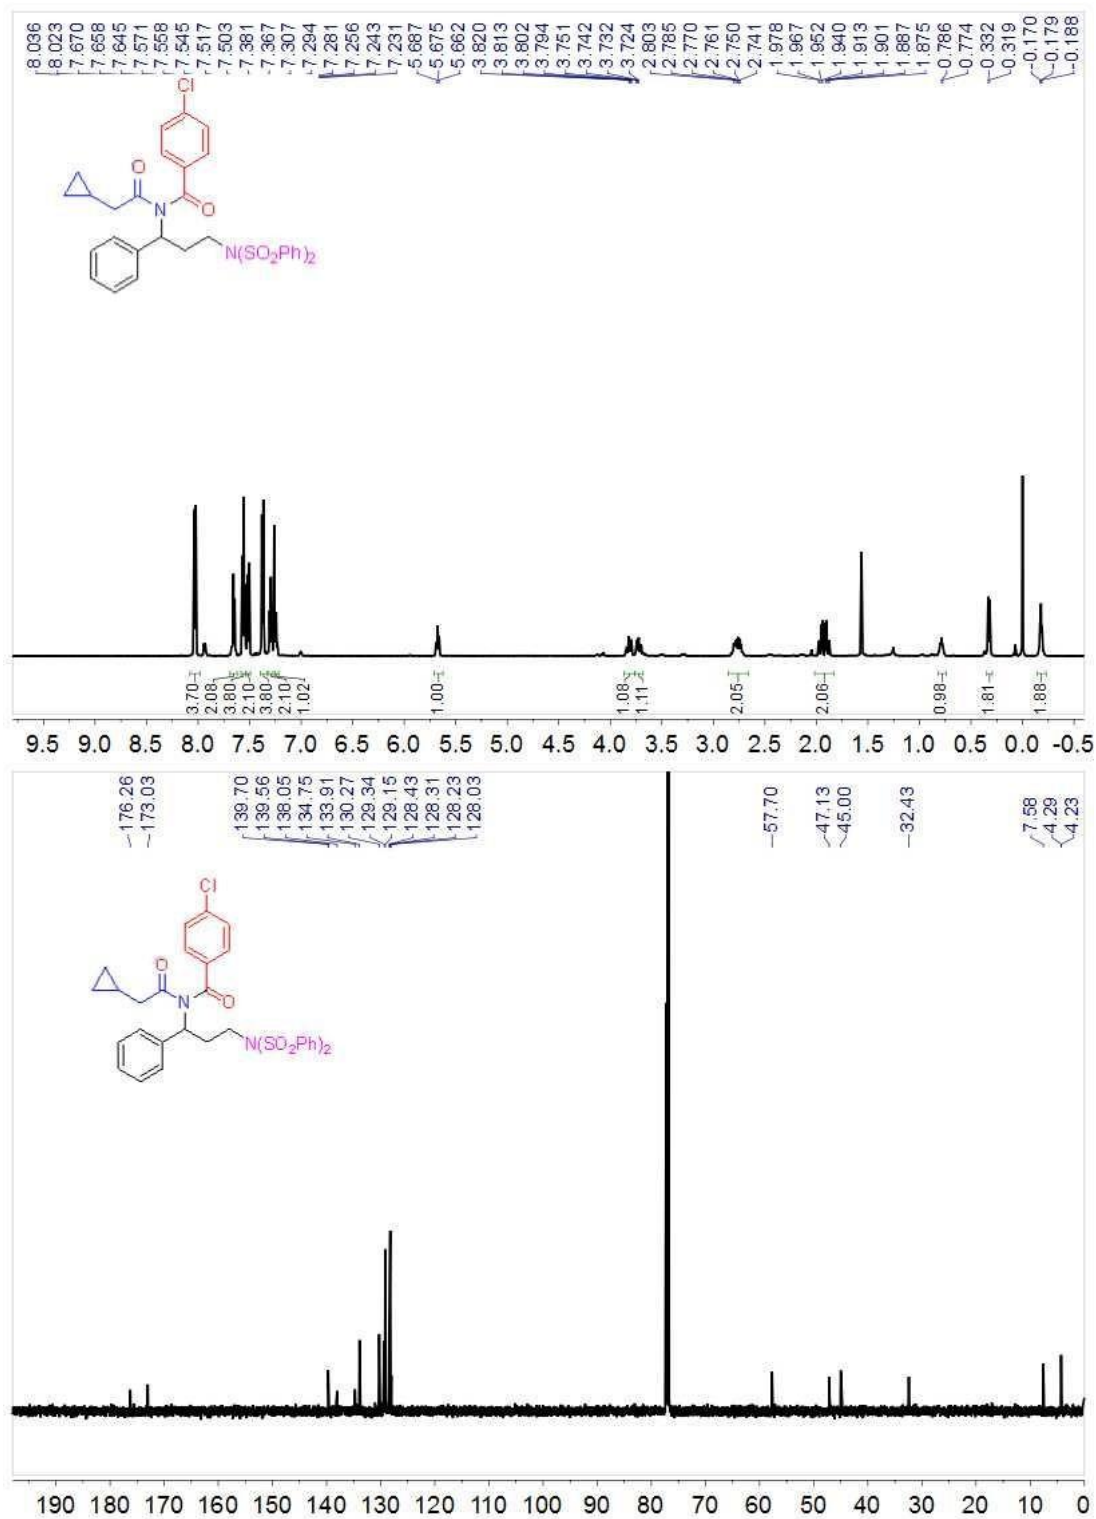

Compound **7e**

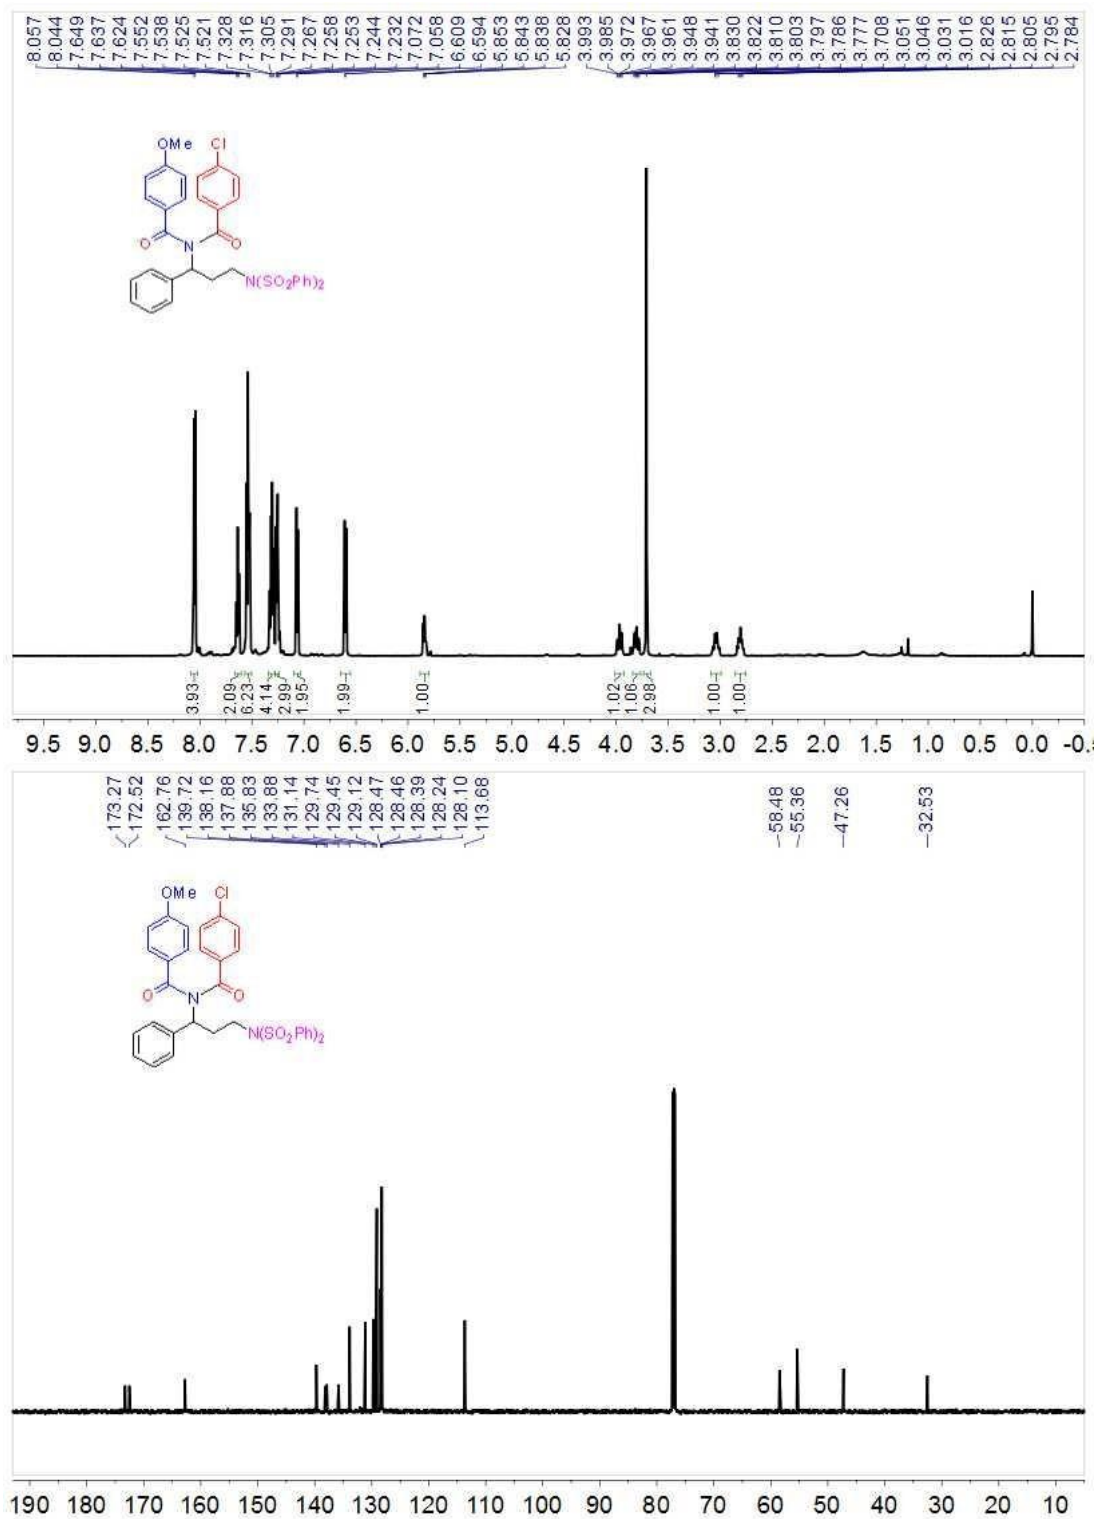

Compound **7f**

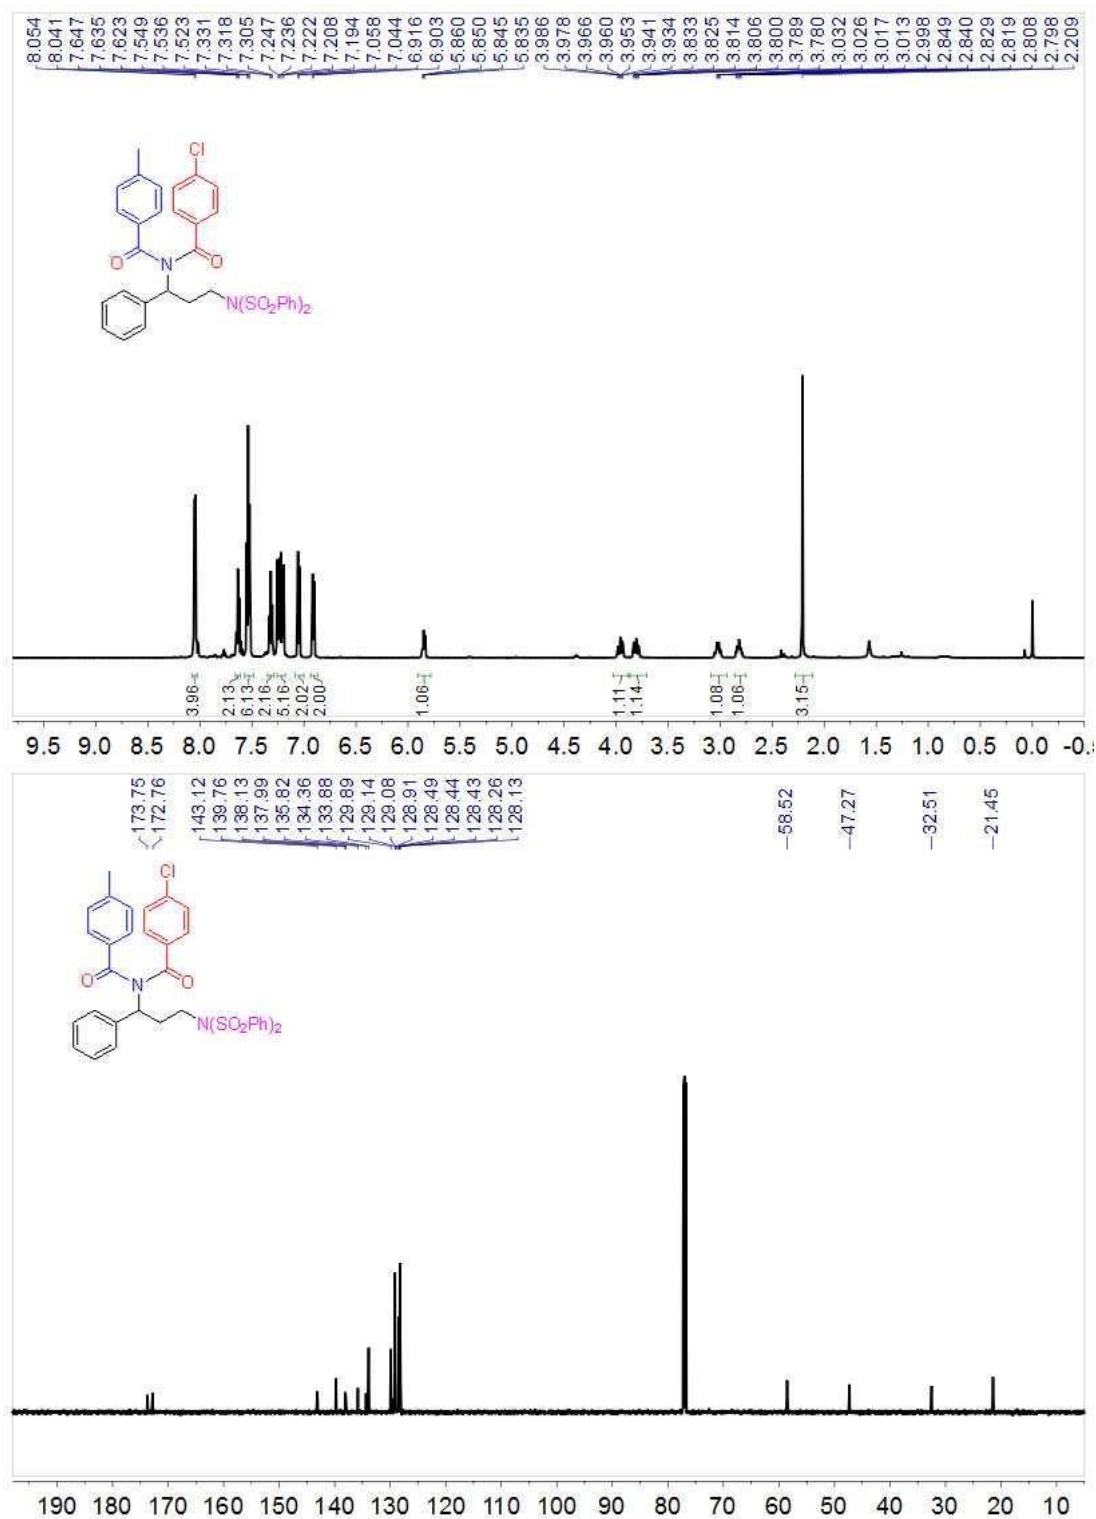

Compound **7g**

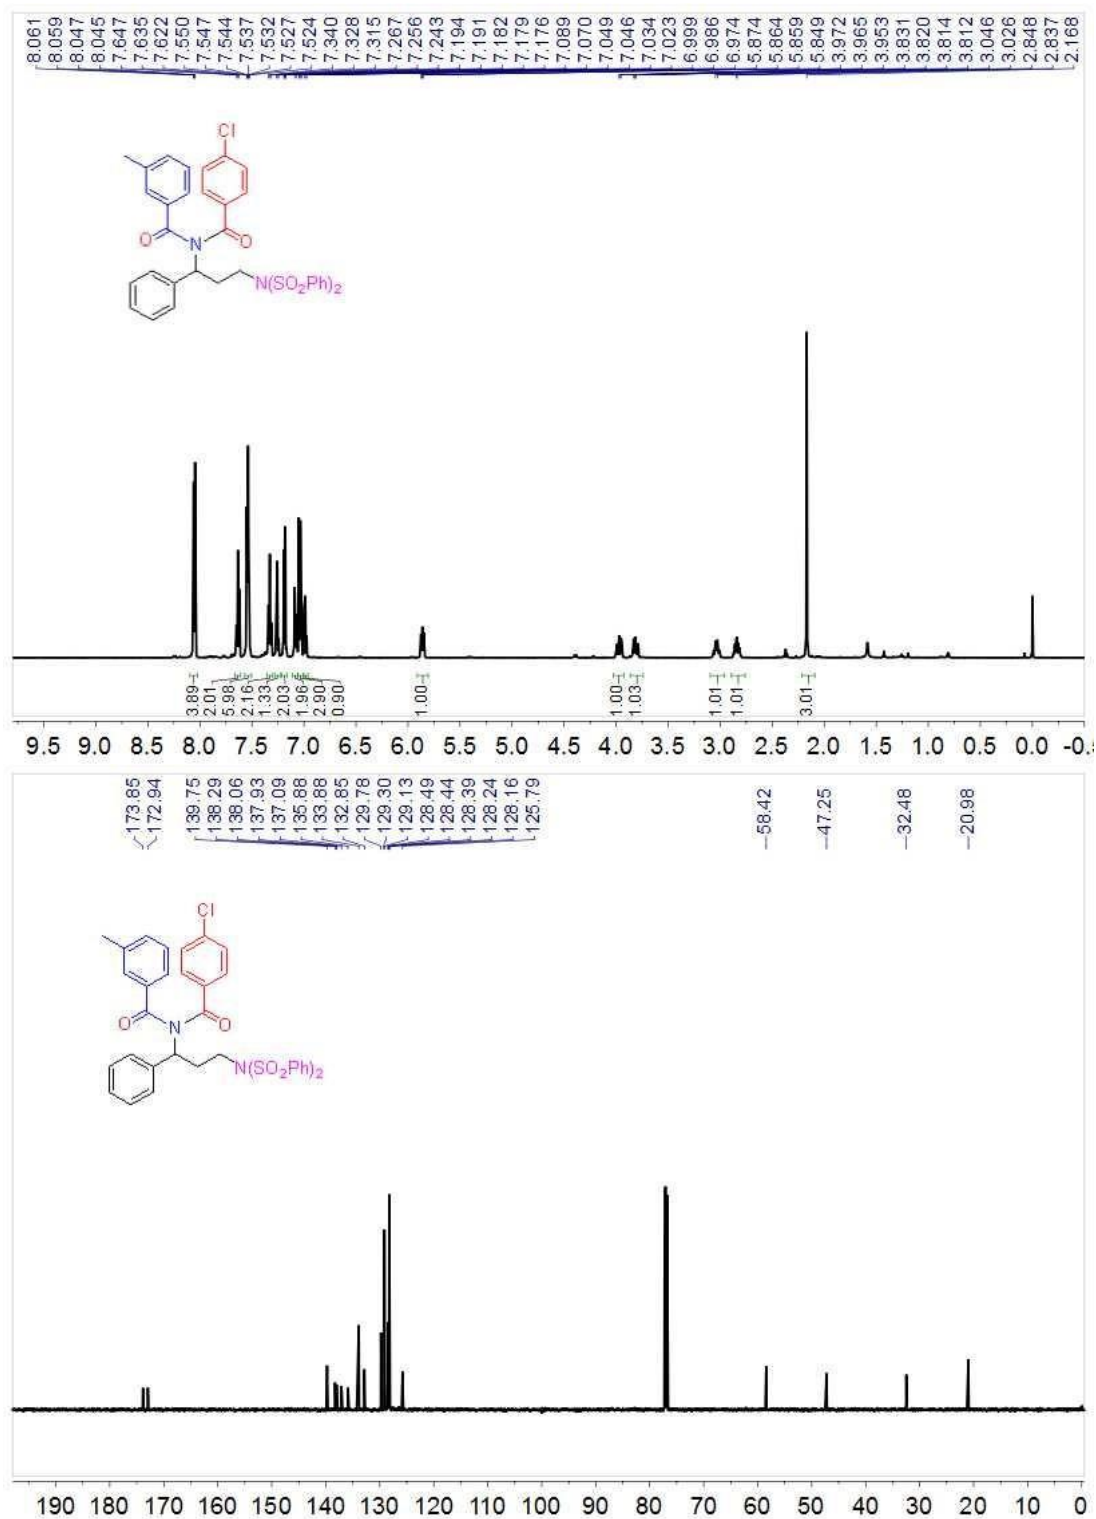

The figure displays the  $^1\text{H}$  and  $^{13}\text{C}$  NMR spectra of compound 10, which is 2-(2-(4-chlorobenzoyl)-1-phenylethan-1-yl)-1-phenylethan-1-one. The chemical structure is shown above the spectra.

**$^1\text{H}$  NMR Spectrum (Top):** The spectrum shows peaks in the aromatic region (6.5–8.1 ppm) and aliphatic region (1.9–2.1 ppm). The chemical shift values (ppm) are listed on the left: 8.068, 8.055, 7.650, 7.638, 7.625, 7.578, 7.565, 7.555, 7.542, 7.529, 7.363, 7.351, 7.338, 7.288, 7.276, 7.263, 7.126, 7.112, 7.055, 7.052, 7.041, 6.978, 6.966, 6.942, 6.930, 6.917, 6.840, 6.827, 5.870, 5.858, 5.845, 5.845, 3.984, 3.965, 3.946, 3.939, 3.831, 3.822, 3.812, 3.804, 3.797, 3.787, 3.778, 3.010, 3.005, 2.999, 2.911, 2.900, 2.880, 2.193.

**$^{13}\text{C}$  NMR Spectrum (Bottom):** The spectrum shows peaks in the aromatic region (125–139 ppm) and aliphatic region (19.7–57.9 ppm). The chemical shift values (ppm) are listed on the left: 173.52, 172.71, 139.74, 137.76, 137.71, 136.51, 136.50, 133.90, 131.17, 131.14, 129.14, 128.94, 128.68, 128.52, 128.25, 128.21, 127.71, 125.42, 57.90, 47.25, 19.73.

Compound **7i**

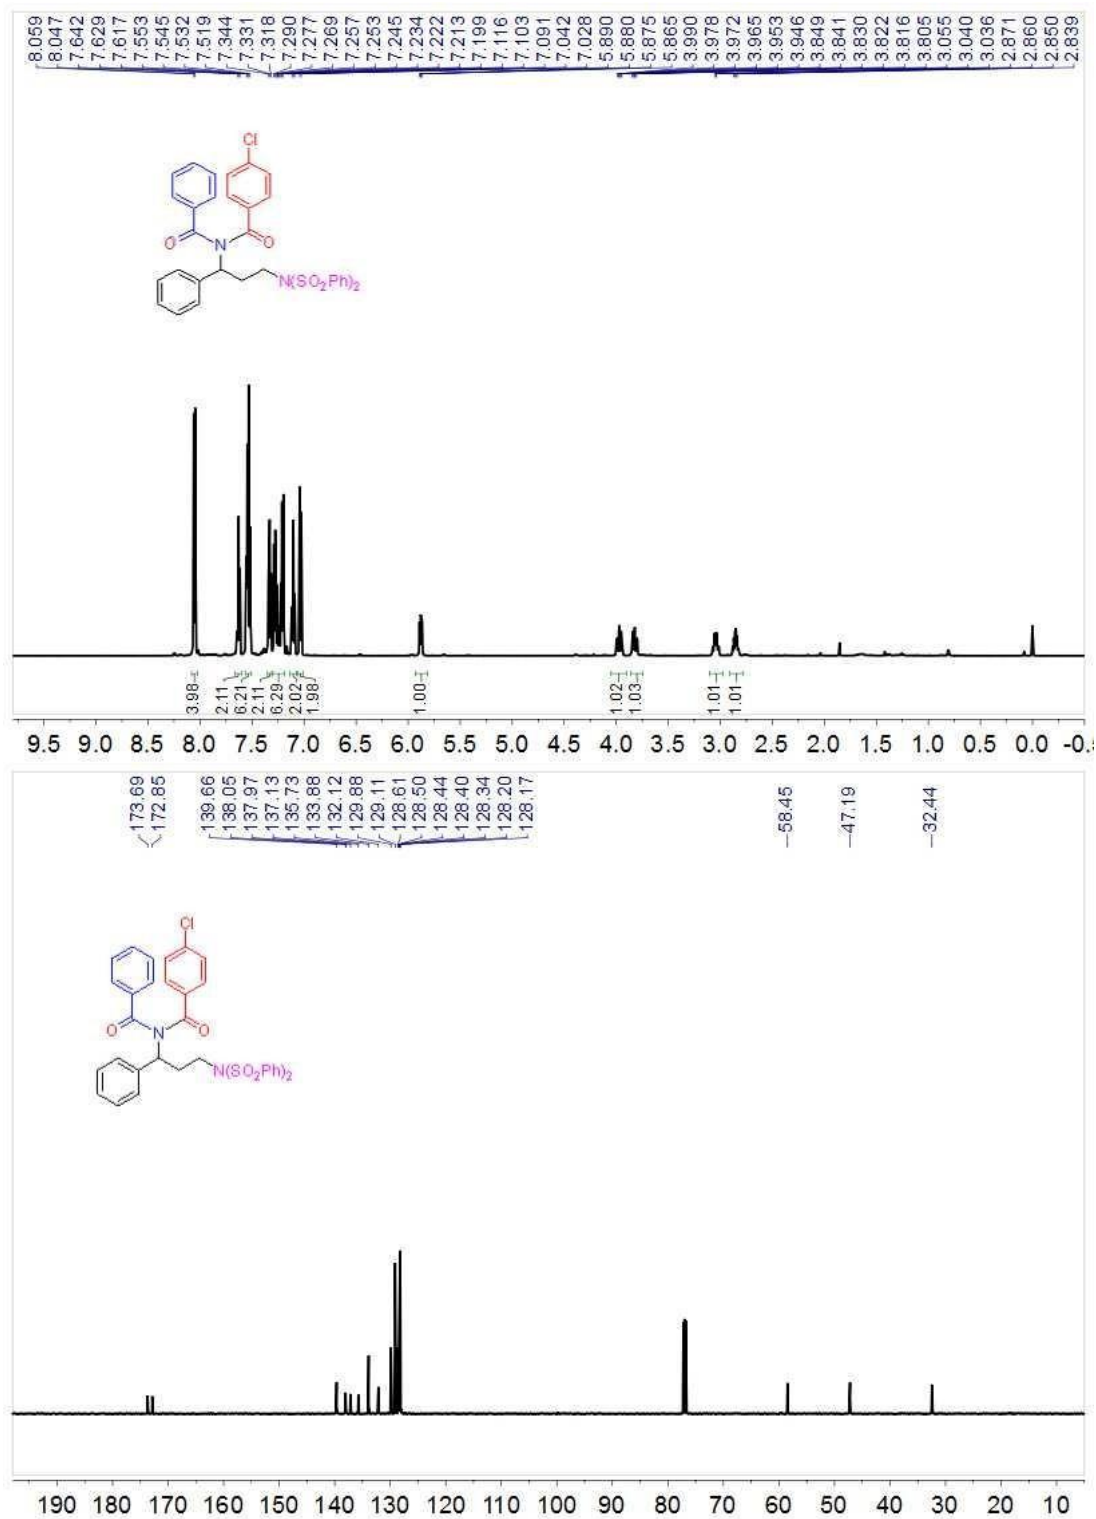

Compound **7j**

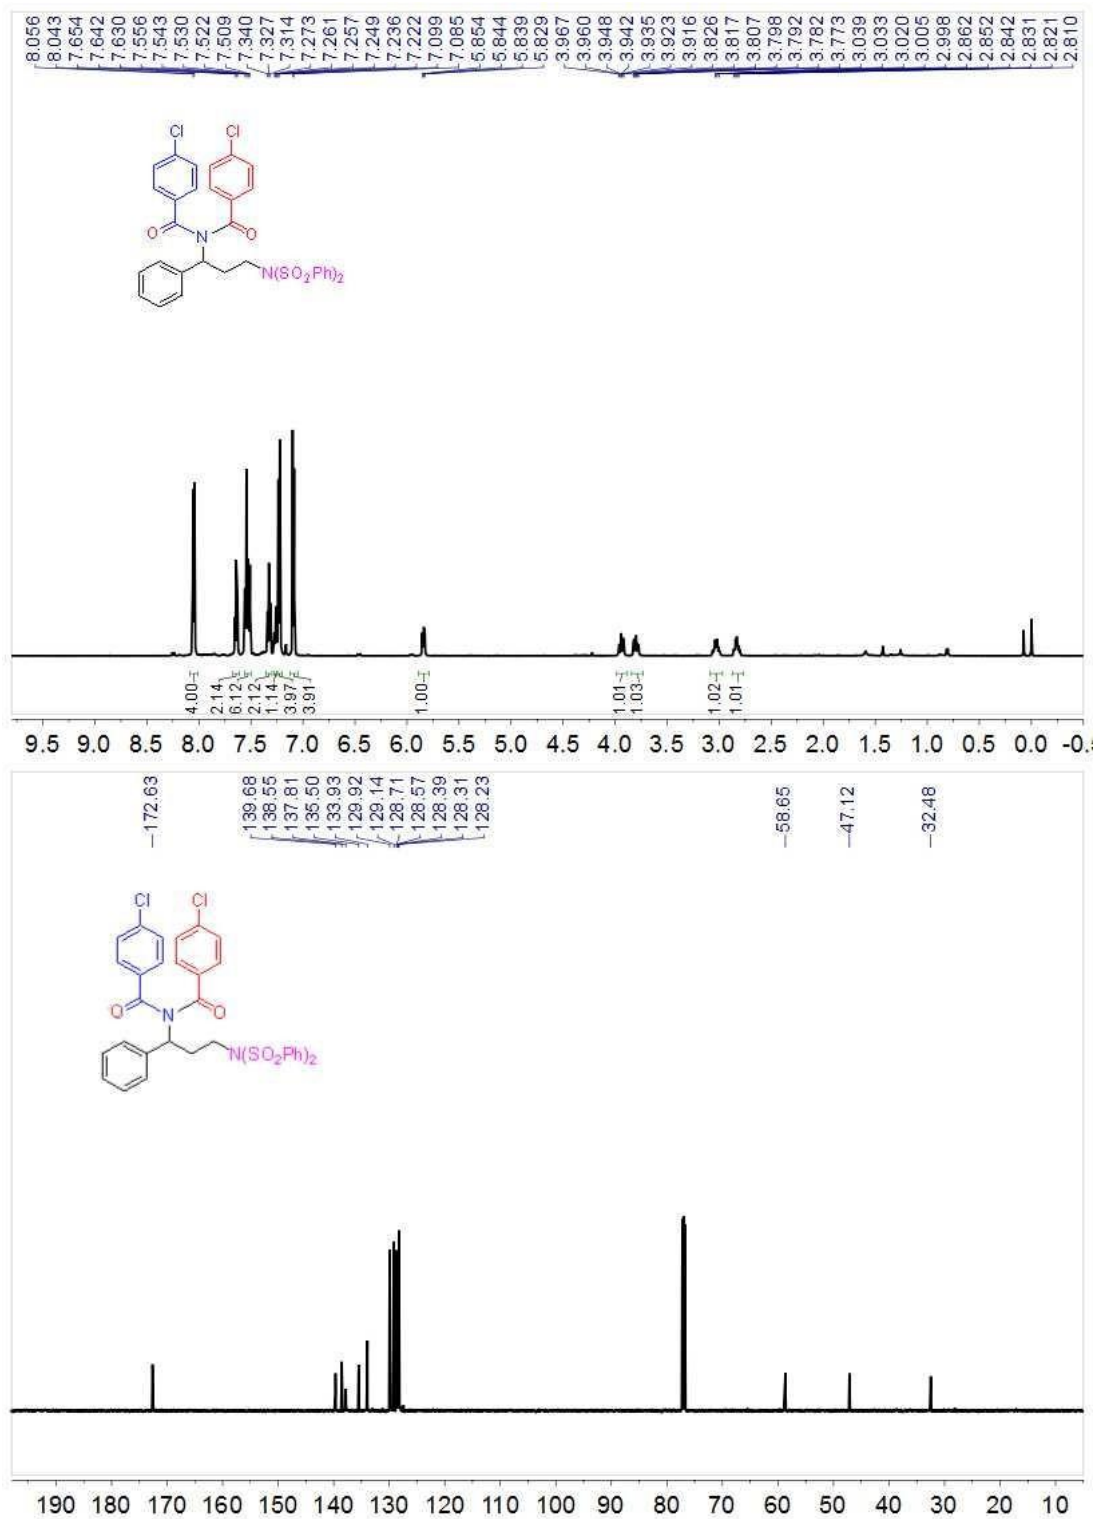



Compound **7k**

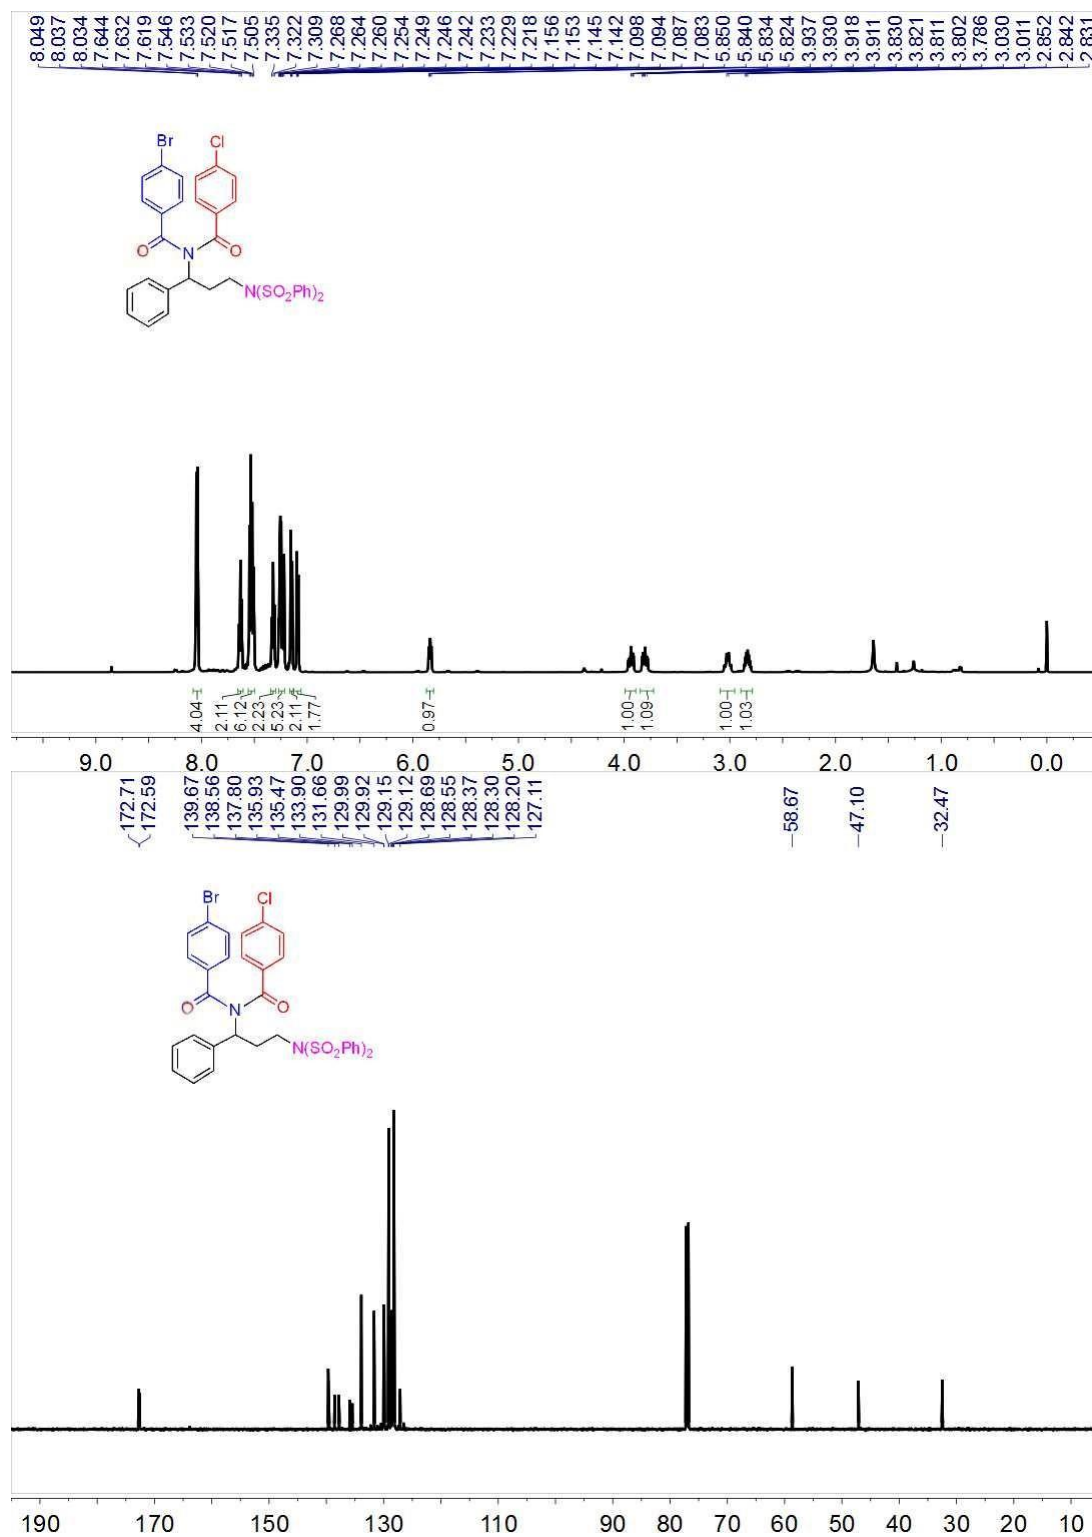



Compound **7l**

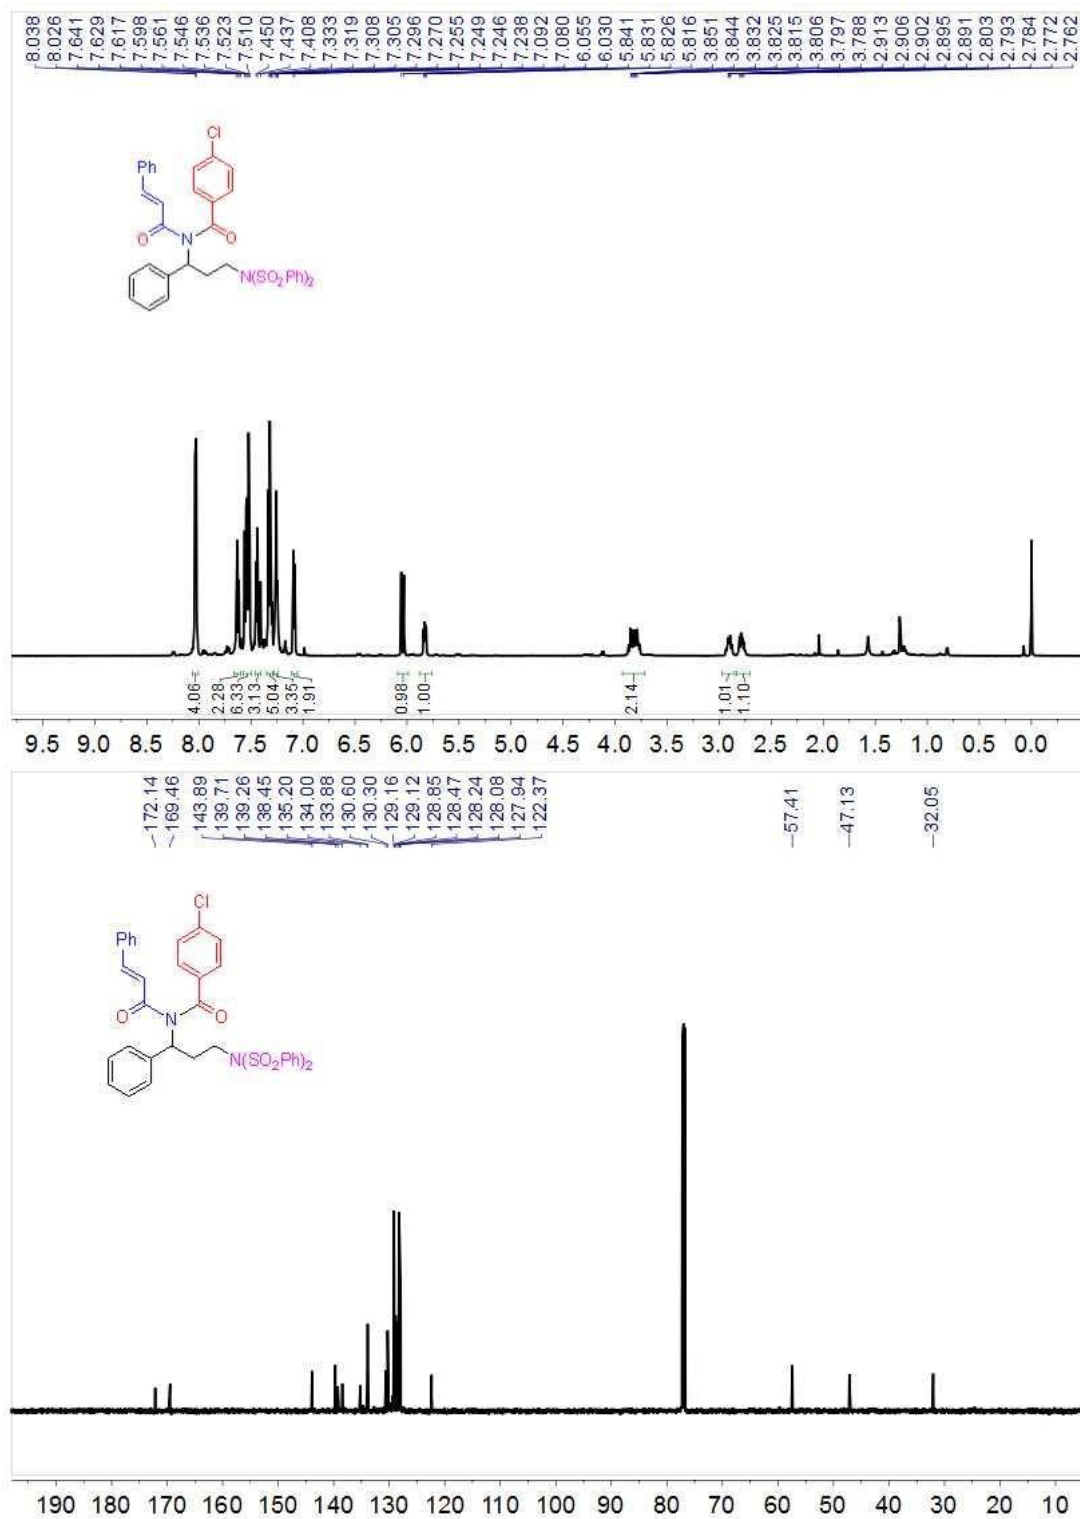

Supplement: d2sc04913a1.pdf [file d2sc04913a1.pdf]
